# Supplementary material for: Ni cluster nucleation and growth on the anatase TiO2(101) surface: a density functional theory study
Source: Royal Society of Chemistry journal article supplement (doi:10.1039/c4ra13975e), 2015-01-01
Supplement: c4ra13975e1.pdf [file c4ra13975e1.pdf]

## Supplementary Information

### Ni Cluster Nucleation and Growth on Anatase TiO<sub>2</sub>(101) Surface: A Density Functional Theory Study

Yanxin Wang<sup>1</sup>, Yan Su<sup>2</sup>, Mingyuan Zhu<sup>1</sup>, Lihua Kang<sup>1\*</sup>

<sup>1</sup>College of Chemistry and Chemical Engineering/ Key Laboratory for Green Processing of Chemical Engineering of Xinjiang Bingtuan. Shihezi University, Shihezi, Xinjiang, 832000, PR China

<sup>2</sup>School of Physics and Optoelectronic Technology and College of Advanced Science and Technology, Dalian University of Technology, Dalian 116024, China.

Table S1. Atomic Bader Charges of Ni Atom and Surface Atoms for Clean Perfect TiO<sub>2</sub>(101) Surface and Ni<sub>1,a</sub>/TiO<sub>2</sub>(101) Complexes.

|                     | Ni   | 6cTi <sup>1</sup> | 6cTi <sup>2</sup> | 5cTi <sup>1</sup> | 5cTi <sup>2</sup> | 2cO <sup>1</sup> | 2cO <sup>2</sup> | 3cO <sup>1</sup> | 3cO <sup>2</sup> |
|---------------------|------|-------------------|-------------------|-------------------|-------------------|------------------|------------------|------------------|------------------|
| TiO <sub>2</sub>    |      | 1.94              | 1.94              | 1.92              | 1.92              | -0.86            | -0.86            | -1.00            | -1.03            |
| Ni/TiO <sub>2</sub> | 0.55 | 1.90              | 1.90              | 1.88              | 1.88              | -0.97            | -0.97            | -1.03            | -1.05            |

The sites of these atoms are labeled in Figure 2a .

Table S2. Atomic Bader Charges of Ni Atom and Surface Atoms for Clean Defective TiO<sub>2</sub>(101) Surface and Ni<sub>1,A</sub>/TiO<sub>2</sub>(101) Complexes.

|                     | Ni   | Ti <sub>v-5c</sub> | Ti <sub>v-4c</sub> | 6cTi | 5cTi | 3cO <sup>a</sup> | 3cO <sup>b</sup> | 2cO   | 3cO <sup>v</sup> |
|---------------------|------|--------------------|--------------------|------|------|------------------|------------------|-------|------------------|
| TiO <sub>2</sub>    |      | 1.86               | 1.83               | 1.93 | 1.90 | -1.03            | -1.05            | -0.87 | -1.00            |
| Ni/TiO <sub>2</sub> | 0.35 | 1.79               | 1.76               | 1.91 | 1.88 | -1.07            | -1.06            | -0.95 | -1.00            |

The sites of these atoms are labeled in Figure 3a .

Table S3. Atomic Bader Charges of Ni Atom and Surface Atoms for Clean Defective TiO<sub>2</sub>(101) Surface and Ni<sub>1,B</sub>/TiO<sub>2</sub>(101) Complexes.

|                     | Ni    | Ti <sub>v-5c</sub> | Ti <sub>v-4c</sub> | 3cO <sup>v</sup> | 3cO <sup>1</sup> | 3cO <sup>2</sup> | 3cO <sup>3</sup> | 3cO <sup>4</sup> |
|---------------------|-------|--------------------|--------------------|------------------|------------------|------------------|------------------|------------------|
| TiO <sub>2</sub>    |       | 1.86               | 1.84               | -1.01            | -1.04            | -1.06            | -1.04            | -1.06            |
| Ni/TiO <sub>2</sub> | -0.29 | 1.77               | 1.71               | -0.99            | -1.02            | -1.04            | -1.02            | -1.04            |

The sites of these atoms are labeled in Figure 3b .

### 1 The description of Ni<sub>1,b</sub>, Ni<sub>1,c</sub> and Ni<sub>1,d</sub>

In the Ni<sub>1,b</sub> configuration, the Ni adatom adsorbs at the 2cO–6cTi–2cO bridge site with the 2cO atom on the step edge, the 6cTi atom at the bottom of the step, and the 3cO atom on the lower terrace of the step. The Ni–2cO, Ni–6cTi and Ni–3cO bond lengths were 1.80, 2.32 and 1.82 Å, respectively. The Ni adatom existence elongates 2cO–6cTi and 3cO–6cTi bond lengths from 1.88 and 2.02 Å on the clean surface to 2.17 and 2.52 Å, respectively, weakening their interaction. By placing a Ni atom on top of either a 2cO or 5cTi atom shifts to the same final bridge site between 2cO and 5cTi atoms (namely 2cO–5cTi bridge site) after relaxation. The Ni<sub>1,d</sub> structure, the least stable structure among three stable structures, has 1.81 eV

adsorption energy, the Ni–2cO and Ni–5cTi bond lengths are 1.75 and 2.40 Å. Ni adsorption at this site causes significant 2cO–5cTi bond elongation, from 1.84 Å on the clean surface to 2.00 Å.

## **2 The description of Ni<sub>1,B</sub>**

In Ni<sub>2,B</sub> structure, the Ni atom adsorb in the vacancy site. The Ni–Ti<sub>v-5c</sub> and Ni–Ti<sub>v-4c</sub> bond lengths were 2.39 and 2.20 Å, respectively. The filling of the oxygen site by Ni adatom caused the two Ti atoms to move toward each other by 0.39 Å. Consequently, the Ti<sub>v-5c</sub>–3cO<sup>v</sup>–Ti<sub>v-4c</sub> angle decreased from 126.23° of the clean defective surface to 101.93°, which is closer to that in the clean perfect surface (101.92°). This configuration's adsorption energy was 2.88 eV, which is even less than that of the Ni adatom on the bridge site of the two perfect surface 2cO atoms.

## **3 The description of Ni<sub>2,b</sub>, Ni<sub>2,c</sub> and Ni<sub>2,d</sub>**

Ni<sub>2,b</sub> displays the second most stable adsorption, in which each of the individual Ni atoms bind at the 2cO–6cTi–3cO bridge site and the Ni–Ni bond is parallel to the [010] direction with Ni–Ni bond length maximally elongating (2.86 Å). Ni<sub>2,c</sub> was built by adding the second Ni atom to the most stable single Ni adsorption (Ni<sub>1,a</sub>). Allowing the structures to relax again, one Ni atom located at the 2cO bridge site, and another sites at the top of 3cO. The least stable was the Ni<sub>2,d</sub> structure with two Ni atoms at the 2cO–5cTi bridge site and the Ni–Ni bond length was 2.33 Å.

## **4 The description of Ni<sub>2,B</sub>, Ni<sub>2,C</sub>**

In the Ni<sub>2,B</sub> configuration, the two Ni atoms symmetrically distributed two sides of the oxygen vacancy site and the Ni1-Ni2 bond axis was parallel with the [010] direction, with 2.34 Å bond length. The Ni<sub>2,B</sub> adsorption energy on the surface was 3.72 eV, which is slightly less than that of Ni<sub>2,A</sub> (3.81eV). Similar with Ni<sub>2,B</sub>, in the most stable structure for Pd dimer adsorption on the defective surface, the two Pd atoms also prefer to symmetrically distribute at the oxygen vacancy site.<sup>33</sup> In the structure of Ni<sub>2,C</sub>, the two Ni atoms occupy the oxygen vacancy site with Ni1 and Ni2 sitting almost atop of Ti<sub>v-5</sub> and Ti<sub>v-4c</sub> atoms, respectively, and the Ni–Ni bond axis perpendicular to the 2cO edge.

### **5 The description of Ni<sub>3,b</sub>, Ni<sub>3,c</sub>, Ni<sub>3,d</sub>**

Ni<sub>3,b</sub> was also obtained by adding a third Ni adatom to the Ni<sub>2,b</sub> structure. In the Ni<sub>3,b</sub> configuration, the Ni<sub>3</sub> triangular plane was tilted to the left and laid almost parallel to the terrace. The Ni1–Ni2 bond length was 2.44 Å and those of Ni1–Ni3 and Ni2–Ni3 were both equal to 2.24 Å. The three Ni–Ni bonds were all shorter than those in Ni<sub>3,a</sub> disclosing that the bonds strength was stronger than those of Ni<sub>3,a</sub>. However, no direct interaction between the Ni3 atom and the TiO<sub>2</sub> surface led to slightly lower adsorption energy of 3.49 eV compared to 3.57 eV in Ni<sub>3,a</sub>. Ni<sub>3,c</sub>, the less stable configurations, was viewed as adding a third adatom to the Ni<sub>2,d</sub> dimer with Ni1 and Ni2 atoms all absorbed at the 2cO–5cTi bridge sites. It also revealed a triangular plane parallel to the terrace. The Ni3 atom was located at the 2cO–6cTi–3cO bridge site with the distance of Ni1–Ni2, Ni1–Ni3, and Ni2–Ni3 equal to 2.22, 2.46, and 2.45 Å, respectively. In contrast to Ni<sub>3,a</sub>, the Ni–Ni bonds parallel to the

2cO–2cO bond of Ni<sub>3,c</sub> became shorter than the other two Ni–Ni bonds. Pd trimer kept its linear structure when absorbed on the perfect anatase TiO<sub>2</sub>(101) surface.<sup>33</sup> The relaxed Ni trimer of Ni<sub>3,e</sub>, however, was highly bent with the middle Ni2 atom and lifting by over 1 Å with respect to Ni1 and Ni2 atoms. Consequently, the linear structure was not stable and became a triangular plane with Ni1–Ni2 and Ni2–Ni3 bond length of 2.30 and 2.48 Å, respectively, and was almost perpendicular to the surface terrace. The adsorption energy was 3.18 eV, which is slightly lower than that of Ni<sub>3,c</sub> (3.20 eV).

## **6 The description of Ni<sub>3,C</sub> and Ni<sub>3,D</sub>**

In the Ni<sub>3,C</sub> configuration, the Ni1–Ni2 bond axis was almost parallel to Ti<sub>v-5c</sub>–Ti<sub>v-4c</sub> direction, similar to that of Ni<sub>2,C</sub>. The bond lengths of Ni1–Ni2, Ni1–Ni3 and Ni2–Ni3 were 2.27, 2.34 and 2.30 Å, respectively, and the distances between Ni1 and Ni2 were a little higher than that of 2.24 Å in Ni<sub>2,D</sub> dimer. This structure was less stable than Ni<sub>3,A</sub> and Ni<sub>3,B</sub>, however, it was the most stable configuration for Pt<sub>3</sub> adsorption on the defective anatase TiO<sub>2</sub>(101) surface.<sup>27</sup> The Ni<sub>3,D</sub> was the least stable among the four adsorbed Ni<sub>3</sub> structures with initial linear Ni<sub>3</sub> adsorption on the defective surface. After relaxation on the defective surface, the Ni<sub>3</sub> was not able to keep its primary linear shape and was highly deformed with the middle Ni3 atom displaced by 0.99 Å to the left and slightly lifted with respect to the remaining two Ni atoms. The relaxation transformed the linear structure into the triangular configuration.

## **7 The description of Ni<sub>4,b</sub> and Ni<sub>4,c</sub>**

In Ni<sub>4,b</sub>, the initial 2D square structure of Ni<sub>4</sub> transformed into a distorted diamond-shape configuration after relaxation on the perfect surface. This structure might have also been seen as adding a Ni4 adatom on the top-right corner of the triangular Ni plane based on the Ni<sub>3,c</sub>. Ni<sub>4,c</sub> configuration was the least stable among these three structures, which was the result of relaxing initial structures constructed from adding a fourth atom on the top of triangle Ni ring based on the Ni<sub>3,a</sub> configuration.

**Table S1. Atomic Bader Charges of Ni Atom and Surface Atoms for Clean Perfect TiO<sub>2</sub>(101) Surface and Ni<sub>1,a</sub>/TiO<sub>2</sub>(101) Complexes.**

|                     | Ni   | 6cTi <sup>1</sup> | 6cTi <sup>2</sup> | 5cTi <sup>1</sup> | 5cTi <sup>2</sup> | 2cO <sup>1</sup> | 2cO <sup>2</sup> | 3cO <sup>1</sup> | 3cO <sup>2</sup> |
|---------------------|------|-------------------|-------------------|-------------------|-------------------|------------------|------------------|------------------|------------------|
| TiO <sub>2</sub>    |      | 1.94              | 1.94              | 1.92              | 1.92              | -0.86            | -0.86            | -1.00            | -1.03            |
| Ni/TiO <sub>2</sub> | 0.55 | 1.90              | 1.90              | 1.88              | 1.88              | -0.97            | -0.97            | -1.03            | -1.05            |

The sites of these atoms are labeled in Figure 2a .

**Table S2. Atomic Bader Charges of Ni Atom and Surface Atoms for Clean Defective TiO<sub>2</sub>(101) Surface and Ni<sub>1,A</sub>/TiO<sub>2</sub>(101) Complexes.**

|                     | Ni   | Ti <sub>v-5c</sub> | Ti <sub>v-4c</sub> | 6cTi | 5cTi | 3cO <sup>a</sup> | 3cO <sup>b</sup> | 2cO   | 3cO <sup>v</sup> |
|---------------------|------|--------------------|--------------------|------|------|------------------|------------------|-------|------------------|
| TiO <sub>2</sub>    |      | 1.86               | 1.83               | 1.93 | 1.90 | -1.03            | -1.05            | -0.87 | -1.00            |
| Ni/TiO <sub>2</sub> | 0.35 | 1.79               | 1.76               | 1.91 | 1.88 | -1.07            | -1.06            | -0.95 | -1.00            |

The sites of these atoms are labeled in Figure 3a .

**Table S3. Atomic Bader Charges of Ni Atom and Surface Atoms for Clean Defective TiO<sub>2</sub>(101) Surface and Ni<sub>1,B</sub>/TiO<sub>2</sub>(101) Complexes.**

|  | Ni | Ti <sub>v-5c</sub> | Ti <sub>v-4c</sub> | 3cO <sup>v</sup> | 3cO <sup>1</sup> | 3cO <sup>2</sup> | 3cO <sup>3</sup> | 3cO <sup>4</sup> |
|--|----|--------------------|--------------------|------------------|------------------|------------------|------------------|------------------|
|--|----|--------------------|--------------------|------------------|------------------|------------------|------------------|------------------|

|                     |       |      |       |       |       |       |       |
|---------------------|-------|------|-------|-------|-------|-------|-------|
| TiO <sub>2</sub>    | 1.86  | 1.84 | -1.01 | -1.04 | -1.06 | -1.04 | -1.06 |
| Ni/TiO <sub>2</sub> | -0.29 | 1.77 | 1.71  | -0.99 | -1.02 | -1.04 | -1.02 |

The sites of these atoms are labeled in Figure 3b .

## 8 Lattice Vectors and Fractional Coordinates of the Optimized Ni<sub>n</sub>/TiO<sub>2</sub> (n = 1–6) systems

**Ni<sub>1,a</sub>:**

1.0000000000000000

|                     |                     |                     |
|---------------------|---------------------|---------------------|
| 11.3280000686999998 | 0.0000000000000000  | 0.0000000000000000  |
| 0.0000000000000000  | 10.2098999023000001 | 0.0000000000000000  |
| 0.0000000000000000  | 0.0000000000000000  | 17.8448009491000015 |

Ti O Ni

24 48 1

Direct

|                    |                    |                    |   |   |   |
|--------------------|--------------------|--------------------|---|---|---|
| 0.0865600030000024 | 0.5369399790000031 | 0.0900399980000017 | F | F | F |
| 0.0865026104509098 | 0.6590079936929742 | 0.2889281633715610 | T | T | T |
| 0.2532300060000026 | 0.0369400009999978 | 0.0900399980000017 | F | F | F |
| 0.2529620023847438 | 0.1587489356289860 | 0.2889100867751889 | T | T | T |
| 0.2532300060000026 | 0.7527499790000007 | 0.0408900010000011 | F | F | F |

|                    |                    |                    |   |   |   |
|--------------------|--------------------|--------------------|---|---|---|
| 0.2533896406781663 | 0.8868947246142479 | 0.2495586083138259 | T | T | T |
| 0.0865600030000024 | 0.2527500090000032 | 0.0408900010000011 | F | F | F |
| 0.0863819912698342 | 0.3877436573990286 | 0.2495404914424105 | T | T | T |
| 0.4198899869999977 | 0.5369399790000031 | 0.0900399980000017 | F | F | F |
| 0.4217287921746239 | 0.6602483088026706 | 0.2890437504328950 | T | T | T |
| 0.5865600110000031 | 0.0369400009999978 | 0.0900399980000017 | F | F | F |
| 0.5864115657202841 | 0.1575246646341222 | 0.2895707272620237 | T | T | T |
| 0.5865600110000031 | 0.7527499790000007 | 0.0408900010000011 | F | F | F |
| 0.5865804341871873 | 0.8894808200479080 | 0.2468231351127876 | T | T | T |
| 0.4198899869999977 | 0.2527500090000032 | 0.0408900010000011 | F | F | F |
| 0.4192929518046238 | 0.3844889459215721 | 0.2462914011941921 | T | T | T |
| 0.7532299760000001 | 0.5369399790000031 | 0.0900399980000017 | F | F | F |
| 0.7513490429232117 | 0.6603408426974287 | 0.2890900806913878 | T | T | T |
| 0.9198899869999977 | 0.0369400009999978 | 0.0900399980000017 | F | F | F |
| 0.9198433645579082 | 0.1586823760519510 | 0.2889132166513392 | T | T | T |
| 0.9198899869999977 | 0.7527499790000007 | 0.0408900010000011 | F | F | F |
| 0.9198454027994303 | 0.8868868586894496 | 0.2494932925881757 | T | T | T |
| 0.7532299760000001 | 0.2527500090000032 | 0.0408900010000011 | F | F | F |
| 0.7536055025523207 | 0.3845189189545354 | 0.2463320871857772 | T | T | T |
| 0.0865600030000024 | 0.7164899710000014 | 0.0491500010000010 | F | F | F |
| 0.0865700386830756 | 0.8472634571779353 | 0.2490786883249234 | T | T | T |
| 0.2532300060000026 | 0.2164900000000003 | 0.0491500010000010 | F | F | F |
| 0.2526345194870537 | 0.3477193566054735 | 0.2490541250375864 | T | T | T |
| 0.2538927389019409 | 0.0700343411232163 | 0.2009470833289340 | T | T | T |
| 0.2532300060000026 | 0.9322999720000027 | 0.0000000000000000 | F | F | F |



|                    |                    |                    |   |   |   |
|--------------------|--------------------|--------------------|---|---|---|
| 0.0865600030000024 | 0.4323000010000015 | 0.0000000000000000 | F | F | F |
| 0.0862828769096440 | 0.5698066453941852 | 0.2009611783719191 | T | T | T |
| 0.0865600030000024 | 0.0732000020000001 | 0.0817899999999980 | F | F | F |
| 0.0863629450221270 | 0.2103039605317101 | 0.3018445302328270 | T | T | T |
| 0.2532300060000026 | 0.5731999870000024 | 0.0817899999999980 | F | F | F |
| 0.2538525884877305 | 0.7101907987137563 | 0.3022061379550939 | T | T | T |
| 0.2532300060000026 | 0.8573899869999977 | 0.1309400049999994 | F | F | F |
| 0.2536551755462781 | 0.9968742955509589 | 0.3343479153467346 | T | T | T |
| 0.0865600030000024 | 0.3573899869999977 | 0.1309400049999994 | F | F | F |
| 0.0864353831901084 | 0.4970356415605889 | 0.3344785675388502 | T | T | T |
| 0.4198899869999977 | 0.7164899710000014 | 0.0491500010000010 | F | F | F |
| 0.4193111730053681 | 0.8476446124325602 | 0.2479614421034143 | T | T | T |
| 0.5865600110000031 | 0.2164900000000003 | 0.0491500010000010 | F | F | F |
| 0.5864749293554431 | 0.3418440389675412 | 0.2418971386374285 | T | T | T |
| 0.5865957539715708 | 0.0716846959719173 | 0.2001630323407912 | T | T | T |
| 0.5865600110000031 | 0.9322999720000027 | 0.0000000000000000 | F | F | F |
| 0.4198899869999977 | 0.4323000010000015 | 0.0000000000000000 | F | F | F |
| 0.4196493666219979 | 0.5702214318522889 | 0.2012373256524103 | T | T | T |
| 0.4198899869999977 | 0.0732000020000001 | 0.0817899999999980 | F | F | F |
| 0.4201011939145316 | 0.2122747686417239 | 0.3025202990580034 | T | T | T |
| 0.5865600110000031 | 0.5731999870000024 | 0.0817899999999980 | F | F | F |
| 0.5865655789872024 | 0.7227783590027462 | 0.3028774954526716 | T | T | T |
| 0.5865600110000031 | 0.8573899869999977 | 0.1309400049999994 | F | F | F |
| 0.5864347820265022 | 0.9965319193656152 | 0.3338453198305341 | T | T | T |
| 0.4198899869999977 | 0.3573899869999977 | 0.1309400049999994 | F | F | F |

|                    |                    |                    |   |   |   |
|--------------------|--------------------|--------------------|---|---|---|
| 0.4210211024405086 | 0.4946076233233014 | 0.3383525047125938 | T | T | T |
| 0.7532299760000001 | 0.7164899710000014 | 0.0491500010000010 | F | F | F |
| 0.7538531518675432 | 0.8475895110768012 | 0.2478756222988900 | T | T | T |
| 0.9198899869999977 | 0.2164900000000003 | 0.0491500010000010 | F | F | F |
| 0.9201452911326966 | 0.3479003967988306 | 0.2491445484038583 | T | T | T |
| 0.9192797978724675 | 0.0700600690068203 | 0.2009008817431982 | T | T | T |
| 0.9198899869999977 | 0.9322999720000027 | 0.0000000000000000 | F | F | F |
| 0.7532299760000001 | 0.4323000010000015 | 0.0000000000000000 | F | F | F |
| 0.7536636899313444 | 0.5701784404673913 | 0.2013117335380226 | T | T | T |
| 0.7532299760000001 | 0.0732000020000001 | 0.0817899999999980 | F | F | F |
| 0.7528115527933644 | 0.2123182099261375 | 0.3025969162962912 | T | T | T |
| 0.9198899869999977 | 0.5731999870000024 | 0.0817899999999980 | F | F | F |
| 0.9192338720764401 | 0.7102946494595849 | 0.3023201556435461 | T | T | T |
| 0.9198899869999977 | 0.8573899869999977 | 0.1309400049999994 | F | F | F |
| 0.9194795709631998 | 0.9968657050289110 | 0.3343183255776835 | T | T | T |
| 0.7532299760000001 | 0.3573899869999977 | 0.1309400049999994 | F | F | F |
| 0.7511597895132662 | 0.4947649064824741 | 0.3384015643032439 | T | T | T |
| 0.5860308130285825 | 0.4811567609405257 | 0.3320545873001500 | T | T | T |

**N<sub>i,b</sub>:**

1.0000000000000000

|                     |                     |                     |
|---------------------|---------------------|---------------------|
| 11.3280000686999998 | 0.0000000000000000  | 0.0000000000000000  |
| 0.0000000000000000  | 10.2098999023000001 | 0.0000000000000000  |
| 0.0000000000000000  | 0.0000000000000000  | 17.8448009491000015 |

Ti O Ni

24 48 1

Direct

|                    |                    |                    |   |   |   |
|--------------------|--------------------|--------------------|---|---|---|
| 0.0865600030000024 | 0.5369399790000031 | 0.0900399980000017 | F | F | F |
| 0.0858539990174214 | 0.6587783769697519 | 0.2882958429480121 | T | T | T |
| 0.2532300060000026 | 0.0369400009999978 | 0.0900399980000017 | F | F | F |
| 0.2521230591999161 | 0.1558595294963361 | 0.2912295157817089 | T | T | T |
| 0.2532300060000026 | 0.7527499790000007 | 0.0408900010000011 | F | F | F |
| 0.2512593564483976 | 0.8871161933298931 | 0.2488152821114028 | T | T | T |
| 0.0865600030000024 | 0.2527500090000032 | 0.0408900010000011 | F | F | F |
| 0.0880413860417045 | 0.3864788482057138 | 0.2492537583056162 | T | T | T |
| 0.4198899869999977 | 0.5369399790000031 | 0.0900399980000017 | F | F | F |
| 0.4199303994182319 | 0.6656467743182221 | 0.2914996394779876 | T | T | T |
| 0.5865600110000031 | 0.0369400009999978 | 0.0900399980000017 | F | F | F |
| 0.5875491632376307 | 0.1558995621662106 | 0.2912174309791909 | T | T | T |
| 0.5865600110000031 | 0.7527499790000007 | 0.0408900010000011 | F | F | F |
| 0.5886400743962327 | 0.8871295587455936 | 0.2488531713635622 | T | T | T |
| 0.4198899869999977 | 0.2527500090000032 | 0.0408900010000011 | F | F | F |
| 0.4198192635600525 | 0.3983616183230573 | 0.2429685928386902 | T | T | T |
| 0.7532299760000001 | 0.5369399790000031 | 0.0900399980000017 | F | F | F |
| 0.7540626576839948 | 0.6588779413491581 | 0.2883267344521585 | T | T | T |
| 0.9198899869999977 | 0.0369400009999978 | 0.0900399980000017 | F | F | F |
| 0.9197531108229677 | 0.1599058761166390 | 0.2884147746448985 | T | T | T |
| 0.9198899869999977 | 0.7527499790000007 | 0.0408900010000011 | F | F | F |
| 0.9200397383149207 | 0.8880066299954916 | 0.2491428123878135 | T | T | T |

|                    |                    |                    |   |   |   |
|--------------------|--------------------|--------------------|---|---|---|
| 0.7532299760000001 | 0.2527500090000032 | 0.0408900010000011 | F | F | F |
| 0.7517614689451920 | 0.3866335810604888 | 0.2492869775971446 | T | T | T |
| 0.0865600030000024 | 0.7164899710000014 | 0.0491500010000010 | F | F | F |
| 0.0850070074076353 | 0.8458238248698268 | 0.2458074488599561 | T | T | T |
| 0.2532300060000026 | 0.2164900000000003 | 0.0491500010000010 | F | F | F |
| 0.2560532807479141 | 0.3450791744423916 | 0.2483121058699657 | T | T | T |
| 0.2589562276138057 | 0.0705834013415977 | 0.2015208304688603 | T | T | T |
| 0.2532300060000026 | 0.9322999720000027 | 0.0000000000000000 | F | F | F |
| 0.0865600030000024 | 0.4323000010000015 | 0.0000000000000000 | F | F | F |
| 0.0865745717824276 | 0.5691386341255902 | 0.2005497469831337 | T | T | T |
| 0.0865600030000024 | 0.0732000020000001 | 0.0817899999999980 | F | F | F |
| 0.0861405513938762 | 0.2117607441185610 | 0.3022330584686384 | T | T | T |
| 0.2532300060000026 | 0.5731999870000024 | 0.0817899999999980 | F | F | F |
| 0.2510267246208159 | 0.7126154242046185 | 0.3014903593803205 | T | T | T |
| 0.2532300060000026 | 0.8573899869999977 | 0.1309400049999994 | F | F | F |
| 0.2409902881554316 | 0.9925527704884196 | 0.3344675457981483 | T | T | T |
| 0.0865600030000024 | 0.3573899869999977 | 0.1309400049999994 | F | F | F |
| 0.0889856827254155 | 0.4965343575685693 | 0.3338136218602358 | T | T | T |
| 0.4198899869999977 | 0.7164899710000014 | 0.0491500010000010 | F | F | F |
| 0.4199366666900206 | 0.8516068040916035 | 0.2517699094424447 | T | T | T |
| 0.5865600110000031 | 0.2164900000000003 | 0.0491500010000010 | F | F | F |
| 0.5836803587395180 | 0.3452273479294731 | 0.2484534962255026 | T | T | T |
| 0.5809026656142710 | 0.0705677180034362 | 0.2015295381068882 | T | T | T |
| 0.5865600110000031 | 0.9322999720000027 | 0.0000000000000000 | F | F | F |
| 0.4198899869999977 | 0.4323000010000015 | 0.0000000000000000 | F | F | F |

|                    |                    |                    |   |   |   |
|--------------------|--------------------|--------------------|---|---|---|
| 0.4198540611316832 | 0.5730944711594440 | 0.2019435868021734 | T | T | T |
| 0.4198899869999977 | 0.0732000020000001 | 0.0817899999999980 | F | F | F |
| 0.4198574344767099 | 0.1877598021197164 | 0.3172835082807480 | T | T | T |
| 0.5865600110000031 | 0.5731999870000024 | 0.0817899999999980 | F | F | F |
| 0.5888381951947257 | 0.7125451429784614 | 0.3015055497639701 | T | T | T |
| 0.5865600110000031 | 0.8573899869999977 | 0.1309400049999994 | F | F | F |
| 0.5987518974071246 | 0.9925840422243691 | 0.3344833542550426 | T | T | T |
| 0.4198899869999977 | 0.3573899869999977 | 0.1309400049999994 | F | F | F |
| 0.4197034068175359 | 0.5131128004647657 | 0.3448690142192567 | T | T | T |
| 0.7532299760000001 | 0.7164899710000014 | 0.0491500010000010 | F | F | F |
| 0.7549140472022473 | 0.8458697952353681 | 0.2458871054792448 | T | T | T |
| 0.9198899869999977 | 0.2164900000000003 | 0.0491500010000010 | F | F | F |
| 0.9198664635754423 | 0.3487422285316534 | 0.2490345795529204 | T | T | T |
| 0.9198671846327661 | 0.0705549267175220 | 0.2005568616283373 | T | T | T |
| 0.9198899869999977 | 0.9322999720000027 | 0.0000000000000000 | F | F | F |
| 0.7532299760000001 | 0.4323000010000015 | 0.0000000000000000 | F | F | F |
| 0.7533146138328836 | 0.5691560696778990 | 0.2005814683445211 | T | T | T |
| 0.7532299760000001 | 0.0732000020000001 | 0.0817899999999980 | F | F | F |
| 0.7535575523674148 | 0.2118049005975639 | 0.3022662181020143 | T | T | T |
| 0.9198899869999977 | 0.5731999870000024 | 0.0817899999999980 | F | F | F |
| 0.9199825822974621 | 0.7113491616076899 | 0.3029649979848352 | T | T | T |
| 0.9198899869999977 | 0.8573899869999977 | 0.1309400049999994 | F | F | F |
| 0.9199639265027224 | 0.9975928374785413 | 0.3338753427268752 | T | T | T |
| 0.7532299760000001 | 0.3573899869999977 | 0.1309400049999994 | F | F | F |
| 0.7510605960558187 | 0.4966202031837127 | 0.3338580279805470 | T | T | T |

0.4195126806538643 0.3416624399661136 0.3689089475993808 T T T

**Ni<sub>1,c</sub>:**

1.0000000000000000

11.3280000686999998 0.0000000000000000 0.0000000000000000

0.0000000000000000 10.2098999023000001 0.0000000000000000

0.0000000000000000 0.0000000000000000 17.8448009491000015

Ti O Ni

24 48 1

Direct

0.0865600030000024 0.5369399790000031 0.0900399980000017 F F F

0.0856569378427633 0.6584052658243764 0.2882438873380548 T T T

0.2532300060000026 0.0369400009999978 0.0900399980000017 F F F

0.2537681999191498 0.1588494202493326 0.2881799041923156 T T T

0.2532300060000026 0.7527499790000007 0.0408900010000011 F F F

0.2516823574386350 0.8873945005077003 0.2489453828403272 T T T

0.0865600030000024 0.2527500090000032 0.0408900010000011 F F F

0.0867902679187792 0.3865283645678531 0.2491807522863118 T T T

0.4198899869999977 0.5369399790000031 0.0900399980000017 F F F

0.4197272032466599 0.6653710255077285 0.2906594700582265 T T T

0.5865600110000031 0.0369400009999978 0.0900399980000017 F F F

0.5858685235035481 0.1587984786842025 0.2881621767099445 T T T

0.5865600110000031 0.7527499790000007 0.0408900010000011 F F F

0.5882710306101139 0.8873098682553250 0.2488208016778277 T T T

|                    |                    |                    |   |   |   |
|--------------------|--------------------|--------------------|---|---|---|
| 0.4198899869999977 | 0.2527500090000032 | 0.0408900010000011 | F | F | F |
| 0.4197611329375635 | 0.3891949783887537 | 0.2469749512921779 | T | T | T |
| 0.7532299760000001 | 0.5369399790000031 | 0.0900399980000017 | F | F | F |
| 0.7543457629457926 | 0.6586396422851054 | 0.2880876090486922 | T | T | T |
| 0.9198899869999977 | 0.0369400009999978 | 0.0900399980000017 | F | F | F |
| 0.9197602795773958 | 0.1593397149710734 | 0.2885651160529498 | T | T | T |
| 0.9198899869999977 | 0.7527499790000007 | 0.0408900010000011 | F | F | F |
| 0.9200901207088334 | 0.8882610095461269 | 0.2494455750274680 | T | T | T |
| 0.7532299760000001 | 0.2527500090000032 | 0.0408900010000011 | F | F | F |
| 0.7527753216745581 | 0.3866421523373931 | 0.2492353951273680 | T | T | T |
| 0.0865600030000024 | 0.7164899710000014 | 0.0491500010000010 | F | F | F |
| 0.0859203124938736 | 0.8479904113271841 | 0.2479194631799559 | T | T | T |
| 0.2532300060000026 | 0.2164900000000003 | 0.0491500010000010 | F | F | F |
| 0.2523817789629756 | 0.3465254359019678 | 0.2485673731738585 | T | T | T |
| 0.2528663923083155 | 0.0695202775121420 | 0.2004499013204841 | T | T | T |
| 0.2532300060000026 | 0.9322999720000027 | 0.0000000000000000 | F | F | F |
| 0.0865600030000024 | 0.4323000010000015 | 0.0000000000000000 | F | F | F |
| 0.0854192386695516 | 0.5693122996137636 | 0.2005419243592801 | T | T | T |
| 0.0865600030000024 | 0.0732000020000001 | 0.0817899999999980 | F | F | F |
| 0.0863726418304485 | 0.2106547864764493 | 0.3020369293088099 | T | T | T |
| 0.2532300060000026 | 0.5731999870000024 | 0.0817899999999980 | F | F | F |
| 0.2511195517565653 | 0.7114521539635834 | 0.3010580768916870 | T | T | T |
| 0.2532300060000026 | 0.8573899869999977 | 0.1309400049999994 | F | F | F |
| 0.2522659323895390 | 0.9962662251686170 | 0.3338559380007070 | T | T | T |
| 0.0865600030000024 | 0.3573899869999977 | 0.1309400049999994 | F | F | F |

|                    |                    |                    |   |   |   |
|--------------------|--------------------|--------------------|---|---|---|
| 0.0868678960683208 | 0.4968995769443065 | 0.3341576915113968 | T | T | T |
| 0.4198899869999977 | 0.7164899710000014 | 0.0491500010000010 | F | F | F |
| 0.4198900725484272 | 0.8466651040908678 | 0.2493064589957041 | T | T | T |
| 0.5865600110000031 | 0.2164900000000003 | 0.0491500010000010 | F | F | F |
| 0.5872280328086655 | 0.3465709474336742 | 0.2486071339881960 | T | T | T |
| 0.5869292705384163 | 0.0695980432182078 | 0.2004023083738052 | T | T | T |
| 0.5865600110000031 | 0.9322999720000027 | 0.0000000000000000 | F | F | F |
| 0.4198899869999977 | 0.4323000010000015 | 0.0000000000000000 | F | F | F |
| 0.4198847077649351 | 0.5667652953438351 | 0.2023188721978185 | T | T | T |
| 0.4198899869999977 | 0.0732000020000001 | 0.0817899999999980 | F | F | F |
| 0.4198433446028687 | 0.2081831237832850 | 0.3006563433460299 | T | T | T |
| 0.5865600110000031 | 0.5731999870000024 | 0.0817899999999980 | F | F | F |
| 0.5888909253467810 | 0.7115914905712706 | 0.3006911812606884 | T | T | T |
| 0.5865600110000031 | 0.8573899869999977 | 0.1309400049999994 | F | F | F |
| 0.5875635323799284 | 0.9961679512808818 | 0.3337960028769493 | T | T | T |
| 0.4198899869999977 | 0.3573899869999977 | 0.1309400049999994 | F | F | F |
| 0.4196195630198673 | 0.4861551724717620 | 0.3370879698158151 | T | T | T |
| 0.7532299760000001 | 0.7164899710000014 | 0.0491500010000010 | F | F | F |
| 0.7541550313348507 | 0.8481897754198114 | 0.2479370097907456 | T | T | T |
| 0.9198899869999977 | 0.2164900000000003 | 0.0491500010000010 | F | F | F |
| 0.9197713704681069 | 0.3470606190977349 | 0.2488460856175356 | T | T | T |
| 0.9198154955342779 | 0.0699373955182977 | 0.2007638313844191 | T | T | T |
| 0.9198899869999977 | 0.9322999720000027 | 0.0000000000000000 | F | F | F |
| 0.7532299760000001 | 0.4323000010000015 | 0.0000000000000000 | F | F | F |
| 0.7546365573400313 | 0.5692884876056210 | 0.2005055103266443 | T | T | T |



|                    |                    |                    |   |   |   |
|--------------------|--------------------|--------------------|---|---|---|
| 0.7532299760000001 | 0.0732000020000001 | 0.0817899999999980 | F | F | F |
| 0.7532396592681884 | 0.2106833992269429 | 0.3021108554845883 | T | T | T |
| 0.9198899869999977 | 0.5731999870000024 | 0.0817899999999980 | F | F | F |
| 0.9199894268619323 | 0.7116859706788665 | 0.3023526783855343 | T | T | T |
| 0.9198899869999977 | 0.8573899869999977 | 0.1309400049999994 | F | F | F |
| 0.9199806138809971 | 0.9971511145775082 | 0.3343093843747684 | T | T | T |
| 0.7532299760000001 | 0.3573899869999977 | 0.1309400049999994 | F | F | F |
| 0.7525052460974042 | 0.4971531032632932 | 0.3341761252975823 | T | T | T |
| 0.4281488379688768 | 0.5848927317792950 | 0.4170181580886897 | T | T | T |

### Ni<sub>1,A</sub>:

1.00000000000000

|                     |                     |                     |
|---------------------|---------------------|---------------------|
| 11.3280000686999998 | 0.0000000000000000  | 0.0000000000000000  |
| 0.0000000000000000  | 10.2098999023000001 | 0.0000000000000000  |
| 0.0000000000000000  | 0.0000000000000000  | 17.8448009491000015 |

Ti O Ni

24 47 1

Direct

|                    |                    |                    |   |   |   |
|--------------------|--------------------|--------------------|---|---|---|
| 0.0865600030000024 | 0.5369399790000031 | 0.0900399980000017 | F | F | F |
| 0.0864589120058146 | 0.6579787204410297 | 0.2903100194186995 | T | T | T |
| 0.2532300060000026 | 0.0369400009999978 | 0.0900399980000017 | F | F | F |
| 0.2513935979813861 | 0.1590113844636441 | 0.2906830016478049 | T | T | T |
| 0.2532300060000026 | 0.7527499790000007 | 0.0408900010000011 | F | F | F |
| 0.2488466394010727 | 0.8916885053893934 | 0.2467105130772159 | T | T | T |

|                    |                    |                    |   |   |   |
|--------------------|--------------------|--------------------|---|---|---|
| 0.0865600030000024 | 0.2527500090000032 | 0.0408900010000011 | F | F | F |
| 0.0868577702255847 | 0.3890643156108058 | 0.2477504542563526 | T | T | T |
| 0.4198899869999977 | 0.5369399790000031 | 0.0900399980000017 | F | F | F |
| 0.4138334509883796 | 0.6740864486856643 | 0.2833030105829391 | T | T | T |
| 0.5865600110000031 | 0.0369400009999978 | 0.0900399980000017 | F | F | F |
| 0.5847577868283985 | 0.1578768375379695 | 0.2921596181155081 | T | T | T |
| 0.5865600110000031 | 0.7527499790000007 | 0.0408900010000011 | F | F | F |
| 0.5880417286976252 | 0.8936183164821481 | 0.2457619705687100 | T | T | T |
| 0.4198899869999977 | 0.2527500090000032 | 0.0408900010000011 | F | F | F |
| 0.4162467794123580 | 0.3783800079392698 | 0.2368104438274208 | T | T | T |
| 0.7532299760000001 | 0.5369399790000031 | 0.0900399980000017 | F | F | F |
| 0.7583504174620945 | 0.6624393647857486 | 0.2882446849853074 | T | T | T |
| 0.9198899869999977 | 0.0369400009999978 | 0.0900399980000017 | F | F | F |
| 0.9197991020938971 | 0.1578687491848558 | 0.2894067917106827 | T | T | T |
| 0.9198899869999977 | 0.7527499790000007 | 0.0408900010000011 | F | F | F |
| 0.9206370502310530 | 0.8890088492458240 | 0.2469392176966989 | T | T | T |
| 0.7532299760000001 | 0.2527500090000032 | 0.0408900010000011 | F | F | F |
| 0.7591895141145126 | 0.3855646255639620 | 0.2450558814426791 | T | T | T |
| 0.0865600030000024 | 0.7164899710000014 | 0.0491500010000010 | F | F | F |
| 0.0866736883534428 | 0.8486464745082645 | 0.2481858042456191 | T | T | T |
| 0.2532300060000026 | 0.2164900000000003 | 0.0491500010000010 | F | F | F |
| 0.2541707398018103 | 0.3568611781082063 | 0.2584073404303737 | T | T | T |
| 0.2517190691917577 | 0.0721013518651662 | 0.2012771387471803 | T | T | T |
| 0.2532300060000026 | 0.9322999720000027 | 0.0000000000000000 | F | F | F |
| 0.0865600030000024 | 0.4323000010000015 | 0.0000000000000000 | F | F | F |

|                    |                     |                    |   |   |   |
|--------------------|---------------------|--------------------|---|---|---|
| 0.0887085419276897 | 0.5712946534753296  | 0.2014272509605555 | T | T | T |
| 0.0865600030000024 | 0.0732000020000001  | 0.0817899999999980 | F | F | F |
| 0.0853087326698807 | 0.2119638755377387  | 0.3001547237578540 | T | T | T |
| 0.2532300060000026 | 0.5731999870000024  | 0.0817899999999980 | F | F | F |
| 0.2535918378689647 | 0.7107921807620843  | 0.3066700513734419 | T | T | T |
| 0.2532300060000026 | 0.8573899869999977  | 0.1309400049999994 | F | F | F |
| 0.2534580520734675 | -0.0033912980707662 | 0.3342461688387701 | T | T | T |
| 0.0865600030000024 | 0.3573899869999977  | 0.1309400049999994 | F | F | F |
| 0.0822603912478353 | 0.4982459601225769  | 0.3351559167718132 | T | T | T |
| 0.4198899869999977 | 0.7164899710000014  | 0.0491500010000010 | F | F | F |
| 0.4211129322745424 | 0.8450628859310567  | 0.2432201383852713 | T | T | T |
| 0.5865600110000031 | 0.2164900000000003  | 0.0491500010000010 | F | F | F |
| 0.5816451872159925 | 0.3570402028076283  | 0.2632336692985057 | T | T | T |
| 0.5864783257874938 | 0.0714653279009169  | 0.2019608852205339 | T | T | T |
| 0.5865600110000031 | 0.9322999720000027  | 0.0000000000000000 | F | F | F |
| 0.4198899869999977 | 0.4323000010000015  | 0.0000000000000000 | F | F | F |
| 0.4030425886460115 | 0.5674193180216173  | 0.2018121151233390 | T | T | T |
| 0.4198899869999977 | 0.0732000020000001  | 0.0817899999999980 | F | F | F |
| 0.4178989563144925 | 0.2106026149163414  | 0.2995779053701763 | T | T | T |
| 0.5865600110000031 | 0.5731999870000024  | 0.0817899999999980 | F | F | F |
| 0.5815298596952996 | 0.7017196939563318  | 0.3119172227541344 | T | T | T |
| 0.5865600110000031 | 0.8573899869999977  | 0.1309400049999994 | F | F | F |
| 0.5832915063140841 | -0.0039452712097456 | 0.3350339211846627 | T | T | T |
| 0.4198899869999977 | 0.3573899869999977  | 0.1309400049999994 | F | F | F |
| 0.7532299760000001 | 0.7164899710000014  | 0.0491500010000010 | F | F | F |

|                    |                     |                    |   |   |   |
|--------------------|---------------------|--------------------|---|---|---|
| 0.7504095133109833 | 0.8462752234118426  | 0.2496401480713273 | T | T | T |
| 0.9198899869999977 | 0.2164900000000003  | 0.0491500010000010 | F | F | F |
| 0.9201468793561539 | 0.3515496963908282  | 0.2496364723663716 | T | T | T |
| 0.9195630368953898 | 0.0702902109391220  | 0.2007865694637959 | T | T | T |
| 0.9198899869999977 | 0.9322999720000027  | 0.0000000000000000 | F | F | F |
| 0.7532299760000001 | 0.4323000010000015  | 0.0000000000000000 | F | F | F |
| 0.7594008759212297 | 0.5726365964103776  | 0.2003482970052832 | T | T | T |
| 0.7532299760000001 | 0.0732000020000001  | 0.0817899999999980 | F | F | F |
| 0.7523801127866444 | 0.2122383969900811  | 0.2983357921702594 | T | T | T |
| 0.9198899869999977 | 0.5731999870000024  | 0.0817899999999980 | F | F | F |
| 0.9207627493721738 | 0.7119390482633382  | 0.3019813848447312 | T | T | T |
| 0.9198899869999977 | 0.8573899869999977  | 0.1309400049999994 | F | F | F |
| 0.9191305392246879 | -0.0032685284544131 | 0.3338927819946619 | T | T | T |
| 0.7532299760000001 | 0.3573899869999977  | 0.1309400049999994 | F | F | F |
| 0.7507201167911322 | 0.4977242309934015  | 0.3355683709845939 | T | T | T |
| 0.5764819128479682 | 0.5164424088923060  | 0.3148195106929126 | T | T | T |

**Ni<sub>1,B</sub>:**

1.0000000000000000

|                     |                     |                     |
|---------------------|---------------------|---------------------|
| 11.3280000686999998 | 0.0000000000000000  | 0.0000000000000000  |
| 0.0000000000000000  | 10.2098999023000001 | 0.0000000000000000  |
| 0.0000000000000000  | 0.0000000000000000  | 17.8448009491000015 |

Ti O Ni

24 47 1

Direct

|                    |                    |                    |   |   |   |
|--------------------|--------------------|--------------------|---|---|---|
| 0.0865600030000024 | 0.5369399790000031 | 0.0900399980000017 | F | F | F |
| 0.0862887399042992 | 0.6610685542420809 | 0.2880398164663036 | T | T | T |
| 0.2532300060000026 | 0.0369400009999978 | 0.0900399980000017 | F | F | F |
| 0.2518662040303665 | 0.1600538912738748 | 0.2891270971853530 | T | T | T |
| 0.2532300060000026 | 0.7527499790000007 | 0.0408900010000011 | F | F | F |
| 0.2526809829871863 | 0.8889914205273162 | 0.2495745699173311 | T | T | T |
| 0.0865600030000024 | 0.2527500090000032 | 0.0408900010000011 | F | F | F |
| 0.0860953755023595 | 0.3893013594008666 | 0.2495692069654026 | T | T | T |
| 0.4198899869999977 | 0.5369399790000031 | 0.0900399980000017 | F | F | F |
| 0.4200086855907627 | 0.6645993732141200 | 0.2871344675307434 | T | T | T |
| 0.5865600110000031 | 0.0369400009999978 | 0.0900399980000017 | F | F | F |
| 0.5880754546550810 | 0.1599709907052082 | 0.2891375964192164 | T | T | T |
| 0.5865600110000031 | 0.7527499790000007 | 0.0408900010000011 | F | F | F |
| 0.5876201456292249 | 0.8888920925544529 | 0.2495457605157797 | T | T | T |
| 0.4198899869999977 | 0.2527500090000032 | 0.0408900010000011 | F | F | F |
| 0.4199065271681960 | 0.3816997181931720 | 0.2445841310897748 | T | T | T |
| 0.7532299760000001 | 0.5369399790000031 | 0.0900399980000017 | F | F | F |
| 0.7540332471690783 | 0.6611013436350531 | 0.2880344100665025 | T | T | T |
| 0.9198899869999977 | 0.0369400009999978 | 0.0900399980000017 | F | F | F |
| 0.9198526373620014 | 0.1601977942315963 | 0.2886081067744403 | T | T | T |
| 0.9198899869999977 | 0.7527499790000007 | 0.0408900010000011 | F | F | F |
| 0.9201873731883781 | 0.8894062820435653 | 0.2493680405679424 | T | T | T |
| 0.7532299760000001 | 0.2527500090000032 | 0.0408900010000011 | F | F | F |
| 0.7536472144616210 | 0.3893136979974978 | 0.2495566482166877 | T | T | T |
| 0.0865600030000024 | 0.7164899710000014 | 0.0491500010000010 | F | F | F |

|                    |                     |                    |   |   |   |
|--------------------|---------------------|--------------------|---|---|---|
| 0.0860932206498138 | 0.8500872271365829  | 0.2478074824853554 | T | T | T |
| 0.2532300060000026 | 0.2164900000000003  | 0.0491500010000010 | F | F | F |
| 0.2519410874254588 | 0.3488446784167333  | 0.2502276754226163 | T | T | T |
| 0.2530872019980510 | 0.0720437555005834  | 0.2008930191325118 | T | T | T |
| 0.2532300060000026 | 0.9322999720000027  | 0.0000000000000000 | F | F | F |
| 0.0865600030000024 | 0.4323000010000015  | 0.0000000000000000 | F | F | F |
| 0.0857024324828177 | 0.5707624311731029  | 0.2004739497067341 | T | T | T |
| 0.0865600030000024 | 0.0732000020000001  | 0.0817899999999980 | F | F | F |
| 0.0860004910858242 | 0.2122958312026295  | 0.3025097588840177 | T | T | T |
| 0.2532300060000026 | 0.5731999870000024  | 0.0817899999999980 | F | F | F |
| 0.2515273586523555 | 0.7134896930428555  | 0.3010115424602247 | T | T | T |
| 0.2532300060000026 | 0.8573899869999977  | 0.1309400049999994 | F | F | F |
| 0.2516406604097853 | -0.0016425805785515 | 0.3346787194753296 | T | T | T |
| 0.0865600030000024 | 0.3573899869999977  | 0.1309400049999994 | F | F | F |
| 0.0863771014756389 | 0.4994974622814561  | 0.3341998893638787 | T | T | T |
| 0.4198899869999977 | 0.7164899710000014  | 0.0491500010000010 | F | F | F |
| 0.4200409815172219 | 0.8532994891382419  | 0.2494961917840965 | T | T | T |
| 0.5865600110000031 | 0.2164900000000003  | 0.0491500010000010 | F | F | F |
| 0.5879372945505514 | 0.3487476915055553  | 0.2501750044371402 | T | T | T |
| 0.5871011643178350 | 0.0720311363776095  | 0.2008801062950741 | T | T | T |
| 0.5865600110000031 | 0.9322999720000027  | 0.0000000000000000 | F | F | F |
| 0.4198899869999977 | 0.4323000010000015  | 0.0000000000000000 | F | F | F |
| 0.4197034477295031 | 0.5654714613424359  | 0.2023496907039069 | T | T | T |
| 0.4198899869999977 | 0.0732000020000001  | 0.0817899999999980 | F | F | F |
| 0.4199740601847356 | 0.2132200694617876  | 0.3039280733885207 | T | T | T |

|                    |                     |                    |   |   |   |
|--------------------|---------------------|--------------------|---|---|---|
| 0.5865600110000031 | 0.5731999870000024  | 0.0817899999999980 | F | F | F |
| 0.5886274248143344 | 0.7133754518502382  | 0.3007745367670129 | T | T | T |
| 0.5865600110000031 | 0.8573899869999977  | 0.1309400049999994 | F | F | F |
| 0.5885130958354859 | -0.0017276092928371 | 0.3346701908957292 | T | T | T |
| 0.4198899869999977 | 0.3573899869999977  | 0.1309400049999994 | F | F | F |
| 0.7532299760000001 | 0.7164899710000014  | 0.0491500010000010 | F | F | F |
| 0.7541344151788394 | 0.8500989015059907  | 0.2478452759196954 | T | T | T |
| 0.9198899869999977 | 0.2164900000000003  | 0.0491500010000010 | F | F | F |
| 0.9198846566887230 | 0.3488339326684592  | 0.2490191523182849 | T | T | T |
| 0.9198245768737938 | 0.0713694369883807  | 0.2006347675126404 | T | T | T |
| 0.9198899869999977 | 0.9322999720000027  | 0.0000000000000000 | F | F | F |
| 0.7532299760000001 | 0.4323000010000015  | 0.0000000000000000 | F | F | F |
| 0.7547985496048237 | 0.5707337560883343  | 0.2004813390558554 | T | T | T |
| 0.7532299760000001 | 0.0732000020000001  | 0.0817899999999980 | F | F | F |
| 0.7538687311148188 | 0.2123291185039521  | 0.3026741746382868 | T | T | T |
| 0.9198899869999977 | 0.5731999870000024  | 0.0817899999999980 | F | F | F |
| 0.9201356294989048 | 0.7136448859924955  | 0.3022313625578019 | T | T | T |
| 0.9198899869999977 | 0.8573899869999977  | 0.1309400049999994 | F | F | F |
| 0.9201529843207699 | -0.0013774913462978 | 0.3343665375677859 | T | T | T |
| 0.7532299760000001 | 0.3573899869999977  | 0.1309400049999994 | F | F | F |
| 0.7533200576472526 | 0.4995311601097950  | 0.3342048706020391 | T | T | T |
| 0.4208947127441885 | 0.4928044072178588  | 0.3631802054889580 | T | T | T |

**Ni<sub>2,a</sub>:**

1.0000000000000000

|                     |                     |                     |
|---------------------|---------------------|---------------------|
| 11.3280000686999998 | 0.0000000000000000  | 0.0000000000000000  |
| 0.0000000000000000  | 10.2098999023000001 | 0.0000000000000000  |
| 0.0000000000000000  | 0.0000000000000000  | 17.8448009491000015 |

Ti O Ni

24 48 2

Direct

|                    |                    |                    |   |   |   |
|--------------------|--------------------|--------------------|---|---|---|
| 0.0865600030000024 | 0.5369399790000031 | 0.0900399980000017 | F | F | F |
| 0.0848035471786238 | 0.6576700603855449 | 0.2888871418001923 | T | T | T |
| 0.2532300060000026 | 0.0369400009999978 | 0.0900399980000017 | F | F | F |
| 0.2516588768188709 | 0.1558374476063943 | 0.2908153424615837 | T | T | T |
| 0.2532300060000026 | 0.7527499790000007 | 0.0408900010000011 | F | F | F |
| 0.2513806522573903 | 0.8866251283671864 | 0.2490252908042807 | T | T | T |
| 0.0865600030000024 | 0.2527500090000032 | 0.0408900010000011 | F | F | F |
| 0.0882694241053279 | 0.3860434653050898 | 0.2493314044545100 | T | T | T |
| 0.4198899869999977 | 0.5369399790000031 | 0.0900399980000017 | F | F | F |
| 0.4196813926602300 | 0.6677453014012361 | 0.2919446715946176 | T | T | T |
| 0.5865600110000031 | 0.0369400009999978 | 0.0900399980000017 | F | F | F |
| 0.5872424539665765 | 0.1553194324876774 | 0.2922776545604638 | T | T | T |
| 0.5865600110000031 | 0.7527499790000007 | 0.0408900010000011 | F | F | F |
| 0.5899698689399764 | 0.8893560243547680 | 0.2467507551737637 | T | T | T |
| 0.4198899869999977 | 0.2527500090000032 | 0.0408900010000011 | F | F | F |
| 0.4239240755163199 | 0.3955231872631721 | 0.2420560827452000 | T | T | T |
| 0.7532299760000001 | 0.5369399790000031 | 0.0900399980000017 | F | F | F |
| 0.7510521145099667 | 0.6597928986173812 | 0.2891588879982006 | T | T | T |



|                    |                    |                    |   |   |   |
|--------------------|--------------------|--------------------|---|---|---|
| 0.9198899869999977 | 0.0369400009999978 | 0.0900399980000017 | F | F | F |
| 0.9197021170972447 | 0.1596748387091320 | 0.2883891401023907 | T | T | T |
| 0.9198899869999977 | 0.7527499790000007 | 0.0408900010000011 | F | F | F |
| 0.9205519018427943 | 0.8868461660123528 | 0.2495235822340420 | T | T | T |
| 0.7532299760000001 | 0.2527500090000032 | 0.0408900010000011 | F | F | F |
| 0.7507885434189027 | 0.3833708241748144 | 0.2477122082056563 | T | T | T |
| 0.0865600030000024 | 0.7164899710000014 | 0.0491500010000010 | F | F | F |
| 0.0856526504714103 | 0.8441193783873884 | 0.2460264188709830 | T | T | T |
| 0.2532300060000026 | 0.2164900000000003 | 0.0491500010000010 | F | F | F |
| 0.2576737548445575 | 0.3455255116913561 | 0.2508128607315884 | T | T | T |
| 0.2585172672090498 | 0.0697416722875491 | 0.2014718835611590 | T | T | T |
| 0.2532300060000026 | 0.9322999720000027 | 0.0000000000000000 | F | F | F |
| 0.0865600030000024 | 0.4323000010000015 | 0.0000000000000000 | F | F | F |
| 0.0870075548816802 | 0.5683762701442286 | 0.2008418221909630 | T | T | T |
| 0.0865600030000024 | 0.0732000020000001 | 0.0817899999999980 | F | F | F |
| 0.0863244181670105 | 0.2106621436153172 | 0.3021402813478979 | T | T | T |
| 0.2532300060000026 | 0.5731999870000024 | 0.0817899999999980 | F | F | F |
| 0.2521990905646244 | 0.7104495306333698 | 0.3028354705918993 | T | T | T |
| 0.2532300060000026 | 0.8573899869999977 | 0.1309400049999994 | F | F | F |
| 0.2418290078466323 | 0.9919630435162268 | 0.3343980909568748 | T | T | T |
| 0.0865600030000024 | 0.3573899869999977 | 0.1309400049999994 | F | F | F |
| 0.0880821030493968 | 0.4954605617431456 | 0.3342182084460174 | T | T | T |
| 0.4198899869999977 | 0.7164899710000014 | 0.0491500010000010 | F | F | F |
| 0.4193003653682410 | 0.8495269209685750 | 0.2505285627781086 | T | T | T |
| 0.5865600110000031 | 0.2164900000000003 | 0.0491500010000010 | F | F | F |

|                    |                    |                    |   |   |   |
|--------------------|--------------------|--------------------|---|---|---|
| 0.5838238811130195 | 0.3331607526022940 | 0.2381716216202823 | T | T | T |
| 0.5797453910185081 | 0.0697990615181119 | 0.2013444749040852 | T | T | T |
| 0.5865600110000031 | 0.9322999720000027 | 0.0000000000000000 | F | F | F |
| 0.4198899869999977 | 0.4323000010000015 | 0.0000000000000000 | F | F | F |
| 0.4193735492494804 | 0.5718898159933058 | 0.2031881089808330 | T | T | T |
| 0.4198899869999977 | 0.0732000020000001 | 0.0817899999999980 | F | F | F |
| 0.4193037655813375 | 0.1869908267179958 | 0.3171373056516522 | T | T | T |
| 0.5865600110000031 | 0.5731999870000024 | 0.0817899999999980 | F | F | F |
| 0.5871734477081667 | 0.7230089704056941 | 0.3038495714097917 | T | T | T |
| 0.5865600110000031 | 0.8573899869999977 | 0.1309400049999994 | F | F | F |
| 0.6000476922210508 | 0.9922632596976528 | 0.3341955325976785 | T | T | T |
| 0.4198899869999977 | 0.3573899869999977 | 0.1309400049999994 | F | F | F |
| 0.4289854005361570 | 0.5144311132476078 | 0.3522051059708479 | T | T | T |
| 0.7532299760000001 | 0.7164899710000014 | 0.0491500010000010 | F | F | F |
| 0.7556270987046911 | 0.8444971295075941 | 0.2451768202885671 | T | T | T |
| 0.9198899869999977 | 0.2164900000000003 | 0.0491500010000010 | F | F | F |
| 0.9205072357105905 | 0.3475466754357344 | 0.2487270638031987 | T | T | T |
| 0.9196120530217410 | 0.0699379764484025 | 0.2005721207810986 | T | T | T |
| 0.9198899869999977 | 0.9322999720000027 | 0.0000000000000000 | F | F | F |
| 0.7532299760000001 | 0.4323000010000015 | 0.0000000000000000 | F | F | F |
| 0.7497088503472851 | 0.5686036141896094 | 0.2014940994030159 | T | T | T |
| 0.7532299760000001 | 0.0732000020000001 | 0.0817899999999980 | F | F | F |
| 0.7534830679297805 | 0.2118678047677849 | 0.3031903864597296 | T | T | T |
| 0.9198899869999977 | 0.5731999870000024 | 0.0817899999999980 | F | F | F |
| 0.9199973527000367 | 0.7100832886660133 | 0.3033885540959704 | T | T | T |

|                    |                     |                    |   |   |   |
|--------------------|---------------------|--------------------|---|---|---|
| 0.9198899869999977 | 0.8573899869999977  | 0.1309400049999994 | F | F | F |
| 0.9202305788545876 | -0.0031484901233377 | 0.3338207976039569 | T | T | T |
| 0.7532299760000001 | 0.3573899869999977  | 0.1309400049999994 | F | F | F |
| 0.7581746890543216 | 0.4911023608629829  | 0.3383676636262668 | T | T | T |
| 0.5957290382751820 | 0.4983683963180895  | 0.3422093411231600 | T | T | T |
| 0.4278118007752840 | 0.3378988177720845  | 0.3707611174505291 | T | T | T |

### Ni<sub>2,b</sub>:

1.00000000000000

|                     |                     |                     |
|---------------------|---------------------|---------------------|
| 11.3280000686999998 | 0.0000000000000000  | 0.0000000000000000  |
| 0.0000000000000000  | 10.2098999023000001 | 0.0000000000000000  |
| 0.0000000000000000  | 0.0000000000000000  | 17.8448009491000015 |

Ti O Ni

24 48 2

Direct

|                    |                    |                    |   |   |   |
|--------------------|--------------------|--------------------|---|---|---|
| 0.0865600030000024 | 0.5369399790000031 | 0.0900399980000017 | F | F | F |
| 0.0865784684125972 | 0.6593756622293339 | 0.2883774111305830 | T | T | T |
| 0.2532300060000026 | 0.0369400009999978 | 0.0900399980000017 | F | F | F |
| 0.2526518103802549 | 0.1572949270352534 | 0.2900338462969510 | T | T | T |
| 0.2532300060000026 | 0.7527499790000007 | 0.0408900010000011 | F | F | F |
| 0.2518301766520994 | 0.8871001074712891 | 0.2491797565608058 | T | T | T |
| 0.0865600030000024 | 0.2527500090000032 | 0.0408900010000011 | F | F | F |
| 0.0869483419975271 | 0.3869836235841063 | 0.2500468422339670 | T | T | T |
| 0.4198899869999977 | 0.5369399790000031 | 0.0900399980000017 | F | F | F |

|                    |                    |                    |   |   |   |
|--------------------|--------------------|--------------------|---|---|---|
| 0.4204717006326500 | 0.6644223900851794 | 0.2903045367238376 | T | T | T |
| 0.5865600110000031 | 0.0369400009999978 | 0.0900399980000017 | F | F | F |
| 0.5868583315836305 | 0.1540710753877920 | 0.2956314238595499 | T | T | T |
| 0.5865600110000031 | 0.7527499790000007 | 0.0408900010000011 | F | F | F |
| 0.5866022412549634 | 0.8894442677349913 | 0.2473244180076174 | T | T | T |
| 0.4198899869999977 | 0.2527500090000032 | 0.0408900010000011 | F | F | F |
| 0.4230251242936051 | 0.3950193357200664 | 0.2436363722736283 | T | T | T |
| 0.7532299760000001 | 0.5369399790000031 | 0.0900399980000017 | F | F | F |
| 0.7530750699762577 | 0.6645526952119362 | 0.2903718248525357 | T | T | T |
| 0.9198899869999977 | 0.0369400009999978 | 0.0900399980000017 | F | F | F |
| 0.9207403322209757 | 0.1574338565080046 | 0.2901585505236418 | T | T | T |
| 0.9198899869999977 | 0.7527499790000007 | 0.0408900010000011 | F | F | F |
| 0.9212877561359634 | 0.8874084130455174 | 0.2492584365383670 | T | T | T |
| 0.7532299760000001 | 0.2527500090000032 | 0.0408900010000011 | F | F | F |
| 0.7509405462444073 | 0.3952271408967138 | 0.2437297257588815 | T | T | T |
| 0.0865600030000024 | 0.7164899710000014 | 0.0491500010000010 | F | F | F |
| 0.0865593341525053 | 0.8437833095661733 | 0.2443641722991919 | T | T | T |
| 0.2532300060000026 | 0.2164900000000003 | 0.0491500010000010 | F | F | F |
| 0.2570312860207802 | 0.3480032535572982 | 0.2518318202140666 | T | T | T |
| 0.2586674633306969 | 0.0708769749206346 | 0.2010832544170546 | T | T | T |
| 0.2532300060000026 | 0.9322999720000027 | 0.0000000000000000 | F | F | F |
| 0.0865600030000024 | 0.4323000010000015 | 0.0000000000000000 | F | F | F |
| 0.0865833783279498 | 0.5680449463615095 | 0.2008386739269519 | T | T | T |
| 0.0865600030000024 | 0.0732000020000001 | 0.0817899999999980 | F | F | F |
| 0.0867284937899287 | 0.2112655222588423 | 0.3012829191946081 | T | T | T |

|                    |                    |                    |   |   |   |
|--------------------|--------------------|--------------------|---|---|---|
| 0.2532300060000026 | 0.5731999870000024 | 0.0817899999999980 | F | F | F |
| 0.2518701903524280 | 0.7115078776991912 | 0.3029366662533292 | T | T | T |
| 0.2532300060000026 | 0.8573899869999977 | 0.1309400049999994 | F | F | F |
| 0.2432786038526777 | 0.9938228165762518 | 0.3341998665881287 | T | T | T |
| 0.0865600030000024 | 0.3573899869999977 | 0.1309400049999994 | F | F | F |
| 0.0868044067677530 | 0.4963303684309208 | 0.3341882641214206 | T | T | T |
| 0.4198899869999977 | 0.7164899710000014 | 0.0491500010000010 | F | F | F |
| 0.4185262780745911 | 0.8497136061295161 | 0.2491801689122428 | T | T | T |
| 0.5865600110000031 | 0.2164900000000003 | 0.0491500010000010 | F | F | F |
| 0.5869030390799240 | 0.3418891673976350 | 0.2401637207627245 | T | T | T |
| 0.5871761658065788 | 0.0702476635868194 | 0.2021863077851529 | T | T | T |
| 0.5865600110000031 | 0.9322999720000027 | 0.0000000000000000 | F | F | F |
| 0.4198899869999977 | 0.4323000010000015 | 0.0000000000000000 | F | F | F |
| 0.4181297574540222 | 0.5705501438099723 | 0.2016404645424148 | T | T | T |
| 0.4198899869999977 | 0.0732000020000001 | 0.0817899999999980 | F | F | F |
| 0.4190275036707080 | 0.1946419840007391 | 0.3152941709241660 | T | T | T |
| 0.5865600110000031 | 0.5731999870000024 | 0.0817899999999980 | F | F | F |
| 0.5867166217614206 | 0.7142864534011165 | 0.2994680691977379 | T | T | T |
| 0.5865600110000031 | 0.8573899869999977 | 0.1309400049999994 | F | F | F |
| 0.5863359488671949 | 0.9889000578649498 | 0.3357613603912878 | T | T | T |
| 0.4198899869999977 | 0.3573899869999977 | 0.1309400049999994 | F | F | F |
| 0.4335030843518922 | 0.5110506134105122 | 0.3434483862693199 | T | T | T |
| 0.7532299760000001 | 0.7164899710000014 | 0.0491500010000010 | F | F | F |
| 0.7548321317316170 | 0.8498413326153896 | 0.2493078313471626 | T | T | T |
| 0.9198899869999977 | 0.2164900000000003 | 0.0491500010000010 | F | F | F |

|                    |                    |                    |   |   |   |
|--------------------|--------------------|--------------------|---|---|---|
| 0.9166048642267079 | 0.3480445301300997 | 0.2519876486744110 | T | T | T |
| 0.9145760624513549 | 0.0709336539380955 | 0.2011970137961017 | T | T | T |
| 0.9198899869999977 | 0.9322999720000027 | 0.0000000000000000 | F | F | F |
| 0.7532299760000001 | 0.4323000010000015 | 0.0000000000000000 | F | F | F |
| 0.7557419264158677 | 0.5707129914638686 | 0.2017220335518743 | T | T | T |
| 0.7532299760000001 | 0.0732000020000001 | 0.0817899999999980 | F | F | F |
| 0.7545676790615844 | 0.1947834309471806 | 0.3156881119672534 | T | T | T |
| 0.9198899869999977 | 0.5731999870000024 | 0.0817899999999980 | F | F | F |
| 0.9214499420282009 | 0.7116798586243918 | 0.3031736052353171 | T | T | T |
| 0.9198899869999977 | 0.8573899869999977 | 0.1309400049999994 | F | F | F |
| 0.9300918060961990 | 0.9939638907582700 | 0.3343204397513347 | T | T | T |
| 0.7532299760000001 | 0.3573899869999977 | 0.1309400049999994 | F | F | F |
| 0.7403011507973525 | 0.5112189429120438 | 0.3435609949727539 | T | T | T |
| 0.4586410320528400 | 0.3412479925163495 | 0.3704595328525150 | T | T | T |
| 0.7145294793803365 | 0.3415525222018642 | 0.3705931967432156 | T | T | T |

**Ni<sub>2,c</sub>:**

1.0000000000000000

|                     |                     |                     |
|---------------------|---------------------|---------------------|
| 11.3280000686999998 | 0.0000000000000000  | 0.0000000000000000  |
| 0.0000000000000000  | 10.2098999023000001 | 0.0000000000000000  |
| 0.0000000000000000  | 0.0000000000000000  | 17.8448009491000015 |

Ti O Ni

24 48 2

Direct

|                    |                    |                    |   |   |   |
|--------------------|--------------------|--------------------|---|---|---|
| 0.0865600030000024 | 0.5369399790000031 | 0.0900399980000017 | F | F | F |
| 0.0873818492373814 | 0.6572772910537549 | 0.2892450768839250 | T | T | T |
| 0.2532300060000026 | 0.0369400009999978 | 0.0900399980000017 | F | F | F |
| 0.2514992063510503 | 0.1562062167837023 | 0.2897674164734470 | T | T | T |
| 0.2532300060000026 | 0.7527499790000007 | 0.0408900010000011 | F | F | F |
| 0.2534309875215692 | 0.8865217250500992 | 0.2471970200683000 | T | T | T |
| 0.0865600030000024 | 0.2527500090000032 | 0.0408900010000011 | F | F | F |
| 0.0856613301518345 | 0.3867387947037508 | 0.2480372423648811 | T | T | T |
| 0.4198899869999977 | 0.5369399790000031 | 0.0900399980000017 | F | F | F |
| 0.4180046038609486 | 0.6598907721390999 | 0.2910822787164262 | T | T | T |
| 0.5865600110000031 | 0.0369400009999978 | 0.0900399980000017 | F | F | F |
| 0.5854875521628462 | 0.1563683581162622 | 0.2911614647599646 | T | T | T |
| 0.5865600110000031 | 0.7527499790000007 | 0.0408900010000011 | F | F | F |
| 0.5866981536760127 | 0.8916567844024220 | 0.2436797722541206 | T | T | T |
| 0.4198899869999977 | 0.2527500090000032 | 0.0408900010000011 | F | F | F |
| 0.4146139520848949 | 0.3825348623891074 | 0.2440538339732278 | T | T | T |
| 0.7532299760000001 | 0.5369399790000031 | 0.0900399980000017 | F | F | F |
| 0.7586122765461245 | 0.6615811787230023 | 0.2890967345341540 | T | T | T |
| 0.9198899869999977 | 0.0369400009999978 | 0.0900399980000017 | F | F | F |
| 0.9194586244558592 | 0.1573191482107809 | 0.2900161460241250 | T | T | T |
| 0.9198899869999977 | 0.7527499790000007 | 0.0408900010000011 | F | F | F |
| 0.9209105793778036 | 0.8882687229944748 | 0.2469772433167565 | T | T | T |
| 0.7532299760000001 | 0.2527500090000032 | 0.0408900010000011 | F | F | F |
| 0.7549057042666940 | 0.3835833229263265 | 0.2444638954663966 | T | T | T |
| 0.0865600030000024 | 0.7164899710000014 | 0.0491500010000010 | F | F | F |

|                    |                    |                    |   |   |   |
|--------------------|--------------------|--------------------|---|---|---|
| 0.0865217112769196 | 0.8462428801713286 | 0.2490924255828910 | T | T | T |
| 0.2532300060000026 | 0.2164900000000003 | 0.0491500010000010 | F | F | F |
| 0.2509482399961159 | 0.3453863486220832 | 0.2468440820877702 | T | T | T |
| 0.2521662038968337 | 0.0688199084878551 | 0.2010693245576509 | T | T | T |
| 0.2532300060000026 | 0.9322999720000027 | 0.0000000000000000 | F | F | F |
| 0.0865600030000024 | 0.4323000010000015 | 0.0000000000000000 | F | F | F |
| 0.0855001050490081 | 0.5699762433947310 | 0.2009291587073043 | T | T | T |
| 0.0865600030000024 | 0.0732000020000001 | 0.0817899999999980 | F | F | F |
| 0.0852650029514108 | 0.2103735186462339 | 0.3022283056905875 | T | T | T |
| 0.2532300060000026 | 0.5731999870000024 | 0.0817899999999980 | F | F | F |
| 0.2537881308230559 | 0.7085507585051612 | 0.3021128992480006 | T | T | T |
| 0.2532300060000026 | 0.8573899869999977 | 0.1309400049999994 | F | F | F |
| 0.2540663657969416 | 0.9944168176355332 | 0.3339918170314244 | T | T | T |
| 0.0865600030000024 | 0.3573899869999977 | 0.1309400049999994 | F | F | F |
| 0.0872900826206190 | 0.4955131552093309 | 0.3341139021690823 | T | T | T |
| 0.4198899869999977 | 0.7164899710000014 | 0.0491500010000010 | F | F | F |
| 0.4205990477294471 | 0.8444541658477082 | 0.2478248445526087 | T | T | T |
| 0.5865600110000031 | 0.2164900000000003 | 0.0491500010000010 | F | F | F |
| 0.5852501449369953 | 0.3481698670191001 | 0.2487074325341541 | T | T | T |
| 0.5866670268994151 | 0.0727391107864960 | 0.2007273985218942 | T | T | T |
| 0.5865600110000031 | 0.9322999720000027 | 0.0000000000000000 | F | F | F |
| 0.4198899869999977 | 0.4323000010000015 | 0.0000000000000000 | F | F | F |
| 0.4244918390004617 | 0.5684765321389960 | 0.2023802571015695 | T | T | T |
| 0.4198899869999977 | 0.0732000020000001 | 0.0817899999999980 | F | F | F |
| 0.4184767301603952 | 0.2097328494177988 | 0.3008364141013881 | T | T | T |



|                    |                    |                    |   |   |   |
|--------------------|--------------------|--------------------|---|---|---|
| 0.5865600110000031 | 0.5731999870000024 | 0.0817899999999980 | F | F | F |
| 0.5903532338894331 | 0.7272365765841076 | 0.3067397599260455 | T | T | T |
| 0.5865600110000031 | 0.8573899869999977 | 0.1309400049999994 | F | F | F |
| 0.5864950466489146 | 0.9963729644939104 | 0.3344658572809341 | T | T | T |
| 0.4198899869999977 | 0.3573899869999977 | 0.1309400049999994 | F | F | F |
| 0.4121723735898162 | 0.4872569746839500 | 0.3374752662992336 | T | T | T |
| 0.7532299760000001 | 0.7164899710000014 | 0.0491500010000010 | F | F | F |
| 0.7539119793175716 | 0.8451684092377379 | 0.2464720861008863 | T | T | T |
| 0.9198899869999977 | 0.2164900000000003 | 0.0491500010000010 | F | F | F |
| 0.9189492377674178 | 0.3488506160775270 | 0.2490701413326458 | T | T | T |
| 0.9199434864394583 | 0.0699416098841450 | 0.2011140795580781 | T | T | T |
| 0.9198899869999977 | 0.9322999720000027 | 0.0000000000000000 | F | F | F |
| 0.7532299760000001 | 0.4323000010000015 | 0.0000000000000000 | F | F | F |
| 0.7556168602635963 | 0.5694913487468384 | 0.2018128710607485 | T | T | T |
| 0.7532299760000001 | 0.0732000020000001 | 0.0817899999999980 | F | F | F |
| 0.7524944093536047 | 0.2117543463704466 | 0.3015204273485490 | T | T | T |
| 0.9198899869999977 | 0.5731999870000024 | 0.0817899999999980 | F | F | F |
| 0.9199672644882984 | 0.7093755017558798 | 0.3036383724760304 | T | T | T |
| 0.9198899869999977 | 0.8573899869999977 | 0.1309400049999994 | F | F | F |
| 0.9184487963683402 | 0.9956010804578801 | 0.3341051756303776 | T | T | T |
| 0.7532299760000001 | 0.3573899869999977 | 0.1309400049999994 | F | F | F |
| 0.7440090266081433 | 0.4939754175831800 | 0.3375432449435152 | T | T | T |
| 0.5658951824485640 | 0.6661014847654723 | 0.4027509414680027 | T | T | T |
| 0.5776500016185816 | 0.4727208218033895 | 0.3373255563548478 | T | T | T |

**Ni<sub>2,A</sub>:**

1.00000000000000

|                     |                     |                     |
|---------------------|---------------------|---------------------|
| 11.3280000686999998 | 0.0000000000000000  | 0.0000000000000000  |
| 0.0000000000000000  | 10.2098999023000001 | 0.0000000000000000  |
| 0.0000000000000000  | 0.0000000000000000  | 17.8448009491000015 |

Ti O Ni

24 47 2

Direct

|                    |                    |                    |   |   |   |
|--------------------|--------------------|--------------------|---|---|---|
| 0.0865600030000024 | 0.5369399790000031 | 0.0900399980000017 | F | F | F |
| 0.0826062245358526 | 0.6628191076709702 | 0.2882805461308661 | T | T | T |
| 0.2532300060000026 | 0.0369400009999978 | 0.0900399980000017 | F | F | F |
| 0.2527253116563821 | 0.1569885040756202 | 0.2905282704264828 | T | T | T |
| 0.2532300060000026 | 0.7527499790000007 | 0.0408900010000011 | F | F | F |
| 0.2511751443275000 | 0.8893729526672789 | 0.2464461684998587 | T | T | T |
| 0.0865600030000024 | 0.2527500090000032 | 0.0408900010000011 | F | F | F |
| 0.0846264053530434 | 0.3871628999646988 | 0.2452659356454441 | T | T | T |
| 0.4198899869999977 | 0.5369399790000031 | 0.0900399980000017 | F | F | F |
| 0.4153061177620617 | 0.6650194780908903 | 0.2874064905920743 | T | T | T |
| 0.5865600110000031 | 0.0369400009999978 | 0.0900399980000017 | F | F | F |
| 0.5890234366359854 | 0.1564701608704693 | 0.2894201118520499 | T | T | T |
| 0.5865600110000031 | 0.7527499790000007 | 0.0408900010000011 | F | F | F |
| 0.5863638813190515 | 0.8864723069724205 | 0.2480221502043056 | T | T | T |
| 0.4198899869999977 | 0.2527500090000032 | 0.0408900010000011 | F | F | F |
| 0.4241886902506993 | 0.3794203746668514 | 0.2411407579107901 | T | T | T |

|                    |                     |                    |   |   |   |
|--------------------|---------------------|--------------------|---|---|---|
| 0.7532299760000001 | 0.5369399790000031  | 0.0900399980000017 | F | F | F |
| 0.7523400053777041 | 0.6606263118904945  | 0.2886871331016560 | T | T | T |
| 0.9198899869999977 | 0.0369400009999978  | 0.0900399980000017 | F | F | F |
| 0.9204179291129932 | 0.1590462613167576  | 0.2897043566340340 | T | T | T |
| 0.9198899869999977 | 0.7527499790000007  | 0.0408900010000011 | F | F | F |
| 0.9185473878774787 | 0.8897232792509480  | 0.2478635869600264 | T | T | T |
| 0.7532299760000001 | 0.2527500090000032  | 0.0408900010000011 | F | F | F |
| 0.7544631694739915 | 0.3894807135847863  | 0.2487725400807007 | T | T | T |
| 0.0865600030000024 | 0.7164899710000014  | 0.0491500010000010 | F | F | F |
| 0.0842203596878354 | 0.8485516483730232  | 0.2469871026017603 | T | T | T |
| 0.2532300060000026 | 0.2164900000000003  | 0.0491500010000010 | F | F | F |
| 0.2533189690997151 | 0.3513336456641376  | 0.2486471207288410 | T | T | T |
| 0.2512326094866595 | 0.0733331197801706  | 0.2006537119313964 | T | T | T |
| 0.2532300060000026 | 0.9322999720000027  | 0.0000000000000000 | F | F | F |
| 0.0865600030000024 | 0.4323000010000015  | 0.0000000000000000 | F | F | F |
| 0.0805125781086151 | 0.5706162206789543  | 0.2010051510073129 | T | T | T |
| 0.0865600030000024 | 0.0732000020000001  | 0.0817899999999980 | F | F | F |
| 0.0868107271128801 | 0.2141915250841979  | 0.3017266820972734 | T | T | T |
| 0.2532300060000026 | 0.5731999870000024  | 0.0817899999999980 | F | F | F |
| 0.2491934350035052 | 0.7190376612127645  | 0.3014575993127989 | T | T | T |
| 0.2532300060000026 | 0.8573899869999977  | 0.1309400049999994 | F | F | F |
| 0.2512210759852484 | -0.0032221897453716 | 0.3343846726001279 | T | T | T |
| 0.0865600030000024 | 0.3573899869999977  | 0.1309400049999994 | F | F | F |
| 0.0996019749304008 | 0.5006771826228013  | 0.3371942894547811 | T | T | T |
| 0.4198899869999977 | 0.7164899710000014  | 0.0491500010000010 | F | F | F |

|                    |                     |                    |   |   |   |
|--------------------|---------------------|--------------------|---|---|---|
| 0.4188476667699561 | 0.8504552204493773  | 0.2485180825090828 | T | T | T |
| 0.5865600110000031 | 0.2164900000000003  | 0.0491500010000010 | F | F | F |
| 0.5885882373279884 | 0.3502690549645837  | 0.2526660256618702 | T | T | T |
| 0.5887301282703469 | 0.0705633429641763  | 0.2007704796635487 | T | T | T |
| 0.5865600110000031 | 0.9322999720000027  | 0.0000000000000000 | F | F | F |
| 0.4198899869999977 | 0.4323000010000015  | 0.0000000000000000 | F | F | F |
| 0.4226553773617694 | 0.5656155220754213  | 0.2022608775425873 | T | T | T |
| 0.4198899869999977 | 0.0732000020000001  | 0.0817899999999980 | F | F | F |
| 0.4209313921424626 | 0.2094995350274766  | 0.2993156474831432 | T | T | T |
| 0.5865600110000031 | 0.5731999870000024  | 0.0817899999999980 | F | F | F |
| 0.5862799788679869 | 0.7115880791136965  | 0.3015485802775707 | T | T | T |
| 0.5865600110000031 | 0.8573899869999977  | 0.1309400049999994 | F | F | F |
| 0.5870824387026543 | -0.0042774733580347 | 0.3344147490245376 | T | T | T |
| 0.4198899869999977 | 0.3573899869999977  | 0.1309400049999994 | F | F | F |
| 0.7532299760000001 | 0.7164899710000014  | 0.0491500010000010 | F | F | F |
| 0.7532555478328093 | 0.8482094031953674  | 0.2481537972196922 | T | T | T |
| 0.9198899869999977 | 0.2164900000000003  | 0.0491500010000010 | F | F | F |
| 0.9203151483200868 | 0.3516988998326868  | 0.2506595788904695 | T | T | T |
| 0.9199624064205560 | 0.0716657367576682  | 0.2010031984575184 | T | T | T |
| 0.9198899869999977 | 0.9322999720000027  | 0.0000000000000000 | F | F | F |
| 0.7532299760000001 | 0.4323000010000015  | 0.0000000000000000 | F | F | F |
| 0.7550613499665407 | 0.5706262651795758  | 0.2009513579505134 | T | T | T |
| 0.7532299760000001 | 0.0732000020000001  | 0.0817899999999980 | F | F | F |
| 0.7547750139862117 | 0.2119298862682213  | 0.3017357026410574 | T | T | T |
| 0.9198899869999977 | 0.5731999870000024  | 0.0817899999999980 | F | F | F |

|                    |                     |                    |   |   |   |
|--------------------|---------------------|--------------------|---|---|---|
| 0.9190698158985739 | 0.7119718271339854  | 0.3036346089487834 | T | T | T |
| 0.9198899869999977 | 0.8573899869999977  | 0.1309400049999994 | F | F | F |
| 0.9200966782045067 | -0.0022110836777004 | 0.3343669747123642 | T | T | T |
| 0.7532299760000001 | 0.3573899869999977  | 0.1309400049999994 | F | F | F |
| 0.7491841736123634 | 0.4991477200262924  | 0.3349922059291729 | T | T | T |
| 0.2719845915468787 | 0.4700276999091989  | 0.3343592031080276 | T | T | T |
| 0.4633239342451898 | 0.5021389730970217  | 0.3682411672712022 | T | T | T |

**Ni<sub>2</sub>B:**

1.00000000000000

|                     |                     |                     |
|---------------------|---------------------|---------------------|
| 11.3280000686999998 | 0.0000000000000000  | 0.0000000000000000  |
| 0.0000000000000000  | 10.2098999023000001 | 0.0000000000000000  |
| 0.0000000000000000  | 0.0000000000000000  | 17.8448009491000015 |

Ti O Ni

24 47 2

Direct

|                    |                    |                    |   |   |   |
|--------------------|--------------------|--------------------|---|---|---|
| 0.0865600030000024 | 0.5369399790000031 | 0.0900399980000017 | F | F | F |
| 0.0847662611617042 | 0.6624145530366983 | 0.2888727983422629 | T | T | T |
| 0.2532300060000026 | 0.0369400009999978 | 0.0900399980000017 | F | F | F |
| 0.2517846970007217 | 0.1565557722332210 | 0.2890936804871870 | T | T | T |
| 0.2532300060000026 | 0.7527499790000007 | 0.0408900010000011 | F | F | F |
| 0.2523791801204948 | 0.8879538104874656 | 0.2471382662623636 | T | T | T |
| 0.0865600030000024 | 0.2527500090000032 | 0.0408900010000011 | F | F | F |
| 0.0857240233860217 | 0.3893751703933629 | 0.2476416353012972 | T | T | T |

|                    |                    |                    |   |   |   |
|--------------------|--------------------|--------------------|---|---|---|
| 0.4198899869999977 | 0.5369399790000031 | 0.0900399980000017 | F | F | F |
| 0.4194254018607498 | 0.6641944826789291 | 0.2865346467978500 | T | T | T |
| 0.5865600110000031 | 0.0369400009999978 | 0.0900399980000017 | F | F | F |
| 0.5879979769740760 | 0.1561948773764358 | 0.2890868622438756 | T | T | T |
| 0.5865600110000031 | 0.7527499790000007 | 0.0408900010000011 | F | F | F |
| 0.5869313174519559 | 0.8876023281965033 | 0.2471040510771302 | T | T | T |
| 0.4198899869999977 | 0.2527500090000032 | 0.0408900010000011 | F | F | F |
| 0.4204317236778887 | 0.3795311559093724 | 0.2409250207719138 | T | T | T |
| 0.7532299760000001 | 0.5369399790000031 | 0.0900399980000017 | F | F | F |
| 0.7546174175774021 | 0.6622560342282271 | 0.2888034372195442 | T | T | T |
| 0.9198899869999977 | 0.0369400009999978 | 0.0900399980000017 | F | F | F |
| 0.9197427704501600 | 0.1598159755917010 | 0.2895920282187139 | T | T | T |
| 0.9198899869999977 | 0.7527499790000007 | 0.0408900010000011 | F | F | F |
| 0.9196952371401208 | 0.8902224773938469 | 0.2483038875547671 | T | T | T |
| 0.7532299760000001 | 0.2527500090000032 | 0.0408900010000011 | F | F | F |
| 0.7535771717404910 | 0.3892958691710739 | 0.2476063181613268 | T | T | T |
| 0.0865600030000024 | 0.7164899710000014 | 0.0491500010000010 | F | F | F |
| 0.0845234509758125 | 0.8482794803244263 | 0.2473672031986232 | T | T | T |
| 0.2532300060000026 | 0.2164900000000003 | 0.0491500010000010 | F | F | F |
| 0.2524377102633504 | 0.3546645023833761 | 0.2573778176845154 | T | T | T |
| 0.2489690947769513 | 0.0729153571140659 | 0.1999189140757630 | T | T | T |
| 0.2532300060000026 | 0.9322999720000027 | 0.0000000000000000 | F | F | F |
| 0.0865600030000024 | 0.4323000010000015 | 0.0000000000000000 | F | F | F |
| 0.0790910685709821 | 0.5702083347001848 | 0.2014587976364804 | T | T | T |
| 0.0865600030000024 | 0.0732000020000001 | 0.0817899999999980 | F | F | F |

|                    |                     |                    |   |   |   |
|--------------------|---------------------|--------------------|---|---|---|
| 0.0853479143903147 | 0.2131784754880376  | 0.3002144213661816 | T | T | T |
| 0.2532300060000026 | 0.5731999870000024  | 0.0817899999999980 | F | F | F |
| 0.2510084952399656 | 0.7179455143852220  | 0.3005591961630868 | T | T | T |
| 0.2532300060000026 | 0.8573899869999977  | 0.1309400049999994 | F | F | F |
| 0.2511235620386030 | -0.0032191697290473 | 0.3340953896488165 | T | T | T |
| 0.0865600030000024 | 0.3573899869999977  | 0.1309400049999994 | F | F | F |
| 0.1094354967668573 | 0.5037485191014301  | 0.3367471923784382 | T | T | T |
| 0.4198899869999977 | 0.7164899710000014  | 0.0491500010000010 | F | F | F |
| 0.4196373672422209 | 0.8523117705521359  | 0.2478586471949814 | T | T | T |
| 0.5865600110000031 | 0.2164900000000003  | 0.0491500010000010 | F | F | F |
| 0.5877476196009326 | 0.3530437203999289  | 0.2559687154845537 | T | T | T |
| 0.5905344963983477 | 0.0724988390740727  | 0.1999344694363330 | T | T | T |
| 0.5865600110000031 | 0.9322999720000027  | 0.0000000000000000 | F | F | F |
| 0.4198899869999977 | 0.4323000010000015  | 0.0000000000000000 | F | F | F |
| 0.4196941545997051 | 0.5681491561801728  | 0.2000442687856594 | T | T | T |
| 0.4198899869999977 | 0.0732000020000001  | 0.0817899999999980 | F | F | F |
| 0.4199629197179416 | 0.2049206053606469  | 0.2954888227069015 | T | T | T |
| 0.5865600110000031 | 0.5731999870000024  | 0.0817899999999980 | F | F | F |
| 0.5882556230289139 | 0.7175016115443377  | 0.3002872637963255 | T | T | T |
| 0.5865600110000031 | 0.8573899869999977  | 0.1309400049999994 | F | F | F |
| 0.5882499332468382 | -0.0037300799215944 | 0.3340491679678469 | T | T | T |
| 0.4198899869999977 | 0.3573899869999977  | 0.1309400049999994 | F | F | F |
| 0.7532299760000001 | 0.7164899710000014  | 0.0491500010000010 | F | F | F |
| 0.7549487240412548 | 0.8481769593637144  | 0.2473949295327866 | T | T | T |
| 0.9198899869999977 | 0.2164900000000003  | 0.0491500010000010 | F | F | F |

|                    |                     |                    |   |   |   |
|--------------------|---------------------|--------------------|---|---|---|
| 0.9197747637662215 | 0.3585614685970269  | 0.2573999612016767 | T | T | T |
| 0.9196276011268966 | 0.0721888107548810  | 0.2009326067081940 | T | T | T |
| 0.9198899869999977 | 0.9322999720000027  | 0.0000000000000000 | F | F | F |
| 0.7532299760000001 | 0.4323000010000015  | 0.0000000000000000 | F | F | F |
| 0.7607690507347667 | 0.5701430205444210  | 0.2014110547349785 | T | T | T |
| 0.7532299760000001 | 0.0732000020000001  | 0.0817899999999980 | F | F | F |
| 0.7543206593538690 | 0.2130783707940520  | 0.3005959616183553 | T | T | T |
| 0.9198899869999977 | 0.5731999870000024  | 0.0817899999999980 | F | F | F |
| 0.9197220233349727 | 0.7111247263301267  | 0.3051337828698631 | T | T | T |
| 0.9198899869999977 | 0.8573899869999977  | 0.1309400049999994 | F | F | F |
| 0.9198470875075659 | -0.0011116923531985 | 0.3345474247874029 | T | T | T |
| 0.7532299760000001 | 0.3573899869999977  | 0.1309400049999994 | F | F | F |
| 0.7292115710690712 | 0.5035208705320997  | 0.3364423110159185 | T | T | T |
| 0.3150839452227041 | 0.4818564537500514  | 0.3434905439872461 | T | T | T |
| 0.5213905748571609 | 0.4847805866818496  | 0.3444904340681164 | T | T | T |

**Ni<sub>2</sub>C:**

1.0000000000000000

|                     |                     |                     |
|---------------------|---------------------|---------------------|
| 11.3280000686999998 | 0.0000000000000000  | 0.0000000000000000  |
| 0.0000000000000000  | 10.2098999023000001 | 0.0000000000000000  |
| 0.0000000000000000  | 0.0000000000000000  | 17.8448009491000015 |

Ti O Ni

24 47 2

Direct



|                    |                    |                    |   |   |   |
|--------------------|--------------------|--------------------|---|---|---|
| 0.0865600030000024 | 0.5369399790000031 | 0.0900399980000017 | F | F | F |
| 0.0852530216287333 | 0.6602162863947129 | 0.2878393630251127 | T | T | T |
| 0.2532300060000026 | 0.0369400009999978 | 0.0900399980000017 | F | F | F |
| 0.2518457693814029 | 0.1599259089726595 | 0.2911983663043932 | T | T | T |
| 0.2532300060000026 | 0.7527499790000007 | 0.0408900010000011 | F | F | F |
| 0.2507581044368965 | 0.8893773369295936 | 0.2494427040987162 | T | T | T |
| 0.0865600030000024 | 0.2527500090000032 | 0.0408900010000011 | F | F | F |
| 0.0867852431861927 | 0.3881644805395918 | 0.2488871024954441 | T | T | T |
| 0.4198899869999977 | 0.5369399790000031 | 0.0900399980000017 | F | F | F |
| 0.4202595825058970 | 0.6705061940221179 | 0.2940358604916699 | T | T | T |
| 0.5865600110000031 | 0.0369400009999978 | 0.0900399980000017 | F | F | F |
| 0.5879627986178564 | 0.1600397311244743 | 0.2911886642822313 | T | T | T |
| 0.5865600110000031 | 0.7527499790000007 | 0.0408900010000011 | F | F | F |
| 0.5888946467274581 | 0.8895485289235057 | 0.2494542245249670 | T | T | T |
| 0.4198899869999977 | 0.2527500090000032 | 0.0408900010000011 | F | F | F |
| 0.4197259285717976 | 0.3850959726428086 | 0.2393722232274950 | T | T | T |
| 0.7532299760000001 | 0.5369399790000031 | 0.0900399980000017 | F | F | F |
| 0.7543672306971615 | 0.6600883095510585 | 0.2880252247392281 | T | T | T |
| 0.9198899869999977 | 0.0369400009999978 | 0.0900399980000017 | F | F | F |
| 0.9198351190026760 | 0.1602910932283444 | 0.2888407299039477 | T | T | T |
| 0.9198899869999977 | 0.7527499790000007 | 0.0408900010000011 | F | F | F |
| 0.9197538364878722 | 0.8898942556270454 | 0.2491158317773276 | T | T | T |
| 0.7532299760000001 | 0.2527500090000032 | 0.0408900010000011 | F | F | F |
| 0.7530547560197847 | 0.3882454051738180 | 0.2488485644661405 | T | T | T |
| 0.0865600030000024 | 0.7164899710000014 | 0.0491500010000010 | F | F | F |

|                    |                     |                    |   |   |   |
|--------------------|---------------------|--------------------|---|---|---|
| 0.0853227953375344 | 0.8507413126997504  | 0.2467935440253278 | T | T | T |
| 0.2532300060000026 | 0.2164900000000003  | 0.0491500010000010 | F | F | F |
| 0.2519014979369464 | 0.3452816968651153  | 0.2473363039349593 | T | T | T |
| 0.2586206130258180 | 0.0724999666074718  | 0.2019292766707764 | T | T | T |
| 0.2532300060000026 | 0.9322999720000027  | 0.0000000000000000 | F | F | F |
| 0.0865600030000024 | 0.4323000010000015  | 0.0000000000000000 | F | F | F |
| 0.0849893664482476 | 0.5700836931612958  | 0.2001169743864478 | T | T | T |
| 0.0865600030000024 | 0.0732000020000001  | 0.0817899999999980 | F | F | F |
| 0.0865218136742884 | 0.2116285134804017  | 0.3030343841207672 | T | T | T |
| 0.2532300060000026 | 0.5731999870000024  | 0.0817899999999980 | F | F | F |
| 0.2488955828490754 | 0.7138721336377293  | 0.3004249413952299 | T | T | T |
| 0.2532300060000026 | 0.8573899869999977  | 0.1309400049999994 | F | F | F |
| 0.2481256565982495 | -0.0029005832367372 | 0.3352638460526770 | T | T | T |
| 0.0865600030000024 | 0.3573899869999977  | 0.1309400049999994 | F | F | F |
| 0.0871097934225482 | 0.4986790136140691  | 0.3336395770335488 | T | T | T |
| 0.4198899869999977 | 0.7164899710000014  | 0.0491500010000010 | F | F | F |
| 0.4198872829571018 | 0.8513645273835128  | 0.2535250745988967 | T | T | T |
| 0.5865600110000031 | 0.2164900000000003  | 0.0491500010000010 | F | F | F |
| 0.5877843179854391 | 0.3456873930180601  | 0.2475618987889506 | T | T | T |
| 0.5810434593687049 | 0.0724589923219831  | 0.2019271772757820 | T | T | T |
| 0.5865600110000031 | 0.9322999720000027  | 0.0000000000000000 | F | F | F |
| 0.4198899869999977 | 0.4323000010000015  | 0.0000000000000000 | F | F | F |
| 0.4196831121044964 | 0.5641171154151139  | 0.2075693061769958 | T | T | T |
| 0.4198899869999977 | 0.0732000020000001  | 0.0817899999999980 | F | F | F |
| 0.4200507595885065 | 0.2174810027201836  | 0.3150724613669905 | T | T | T |

|                    |                     |                    |   |   |   |
|--------------------|---------------------|--------------------|---|---|---|
| 0.5865600110000031 | 0.5731999870000024  | 0.0817899999999980 | F | F | F |
| 0.5906437551005848 | 0.7135412802009440  | 0.3006015177166664 | T | T | T |
| 0.5865600110000031 | 0.8573899869999977  | 0.1309400049999994 | F | F | F |
| 0.5917226850704497 | -0.0028312941092729 | 0.3352414021509660 | T | T | T |
| 0.4198899869999977 | 0.3573899869999977  | 0.1309400049999994 | F | F | F |
| 0.7532299760000001 | 0.7164899710000014  | 0.0491500010000010 | F | F | F |
| 0.7541550839924693 | 0.8504915001974747  | 0.2468321837652737 | T | T | T |
| 0.9198899869999977 | 0.2164900000000003  | 0.0491500010000010 | F | F | F |
| 0.9199080017337044 | 0.3476938429310614  | 0.2489382923305176 | T | T | T |
| 0.9197754244348560 | 0.0717639498313457  | 0.2006498156863732 | T | T | T |
| 0.9198899869999977 | 0.9322999720000027  | 0.0000000000000000 | F | F | F |
| 0.7532299760000001 | 0.4323000010000015  | 0.0000000000000000 | F | F | F |
| 0.7546490252424528 | 0.5701194389774337  | 0.2002018020858348 | T | T | T |
| 0.7532299760000001 | 0.0732000020000001  | 0.0817899999999980 | F | F | F |
| 0.7532643829737555 | 0.2116831272049539  | 0.3029638906636438 | T | T | T |
| 0.9198899869999977 | 0.5731999870000024  | 0.0817899999999980 | F | F | F |
| 0.9197948733330951 | 0.7140137391472307  | 0.3022630399974535 | T | T | T |
| 0.9198899869999977 | 0.8573899869999977  | 0.1309400049999994 | F | F | F |
| 0.9197317775427114 | -0.0015260388632311 | 0.3344174543187676 | T | T | T |
| 0.7532299760000001 | 0.3573899869999977  | 0.1309400049999994 | F | F | F |
| 0.7528437558335169 | 0.4985355131229107  | 0.3337007999544417 | T | T | T |
| 0.4201663015954573 | 0.3956945899715867  | 0.3609840150007100 | T | T | T |
| 0.4107174558815378 | 0.5978291213039628  | 0.4095629920789940 | T | T | T |

**Ni<sub>3,a</sub>:**

1.00000000000000

|                     |                     |                     |
|---------------------|---------------------|---------------------|
| 11.3280000686999998 | 0.0000000000000000  | 0.0000000000000000  |
| 0.0000000000000000  | 10.2098999023000001 | 0.0000000000000000  |
| 0.0000000000000000  | 0.0000000000000000  | 17.8448009491000015 |

Ti O Ni

24 48 3

Direct

|                    |                    |                    |   |   |   |
|--------------------|--------------------|--------------------|---|---|---|
| 0.0865600030000024 | 0.5369399790000031 | 0.0900399980000017 | F | F | F |
| 0.0866115895516150 | 0.6605570591703462 | 0.2884120399757739 | T | T | T |
| 0.2532300060000026 | 0.0369400009999978 | 0.0900399980000017 | F | F | F |
| 0.2500942609611717 | 0.1600453496536302 | 0.2887897623445084 | T | T | T |
| 0.2532300060000026 | 0.7527499790000007 | 0.0408900010000011 | F | F | F |
| 0.2521780413170391 | 0.8896610709559163 | 0.2489462744314866 | T | T | T |
| 0.0865600030000024 | 0.2527500090000032 | 0.0408900010000011 | F | F | F |
| 0.0867823595831907 | 0.3903301365651241 | 0.2491751621783260 | T | T | T |
| 0.4198899869999977 | 0.5369399790000031 | 0.0900399980000017 | F | F | F |
| 0.4186489410157420 | 0.6662412089358942 | 0.2884505256714799 | T | T | T |
| 0.5865600110000031 | 0.0369400009999978 | 0.0900399980000017 | F | F | F |
| 0.5870918753337397 | 0.1610276120677593 | 0.3004517368310404 | T | T | T |
| 0.5865600110000031 | 0.7527499790000007 | 0.0408900010000011 | F | F | F |
| 0.5868091380034297 | 0.8986155285871346 | 0.2464059042934488 | T | T | T |
| 0.4198899869999977 | 0.2527500090000032 | 0.0408900010000011 | F | F | F |
| 0.4244332370391168 | 0.3878051963169269 | 0.2455534015207469 | T | T | T |
| 0.7532299760000001 | 0.5369399790000031 | 0.0900399980000017 | F | F | F |

|                    |                    |                    |   |   |   |
|--------------------|--------------------|--------------------|---|---|---|
| 0.7547852710641090 | 0.6665538093655659 | 0.2882835790147089 | T | T | T |
| 0.9198899869999977 | 0.0369400009999978 | 0.0900399980000017 | F | F | F |
| 0.9240632025101327 | 0.1599344093102255 | 0.2887793518402102 | T | T | T |
| 0.9198899869999977 | 0.7527499790000007 | 0.0408900010000011 | F | F | F |
| 0.9216535196228962 | 0.8896777105332584 | 0.2489603853406329 | T | T | T |
| 0.7532299760000001 | 0.2527500090000032 | 0.0408900010000011 | F | F | F |
| 0.7494654676875865 | 0.3879464825983642 | 0.2456646284665536 | T | T | T |
| 0.0865600030000024 | 0.7164899710000014 | 0.0491500010000010 | F | F | F |
| 0.0868733040925016 | 0.8474341808234853 | 0.2461384212110525 | T | T | T |
| 0.2532300060000026 | 0.2164900000000003 | 0.0491500010000010 | F | F | F |
| 0.2554248275944349 | 0.3511776673454969 | 0.2506934704667051 | T | T | T |
| 0.2542785007785902 | 0.0712490101205146 | 0.2005159495736235 | T | T | T |
| 0.2532300060000026 | 0.9322999720000027 | 0.0000000000000000 | F | F | F |
| 0.0865600030000024 | 0.4323000010000015 | 0.0000000000000000 | F | F | F |
| 0.0866096143052645 | 0.5705707103483508 | 0.2005688092486775 | T | T | T |
| 0.0865600030000024 | 0.0732000020000001 | 0.0817899999999980 | F | F | F |
| 0.0870175950286879 | 0.2157435440686053 | 0.3035349767287027 | T | T | T |
| 0.2532300060000026 | 0.5731999870000024 | 0.0817899999999980 | F | F | F |
| 0.2521376197914397 | 0.7123088135853638 | 0.3018751176269900 | T | T | T |
| 0.2532300060000026 | 0.8573899869999977 | 0.1309400049999994 | F | F | F |
| 0.2468917026658511 | 0.9968651168726247 | 0.3338891402748516 | T | T | T |
| 0.0865600030000024 | 0.3573899869999977 | 0.1309400049999994 | F | F | F |
| 0.0865770959150027 | 0.4991110758043475 | 0.3343442987994374 | T | T | T |
| 0.4198899869999977 | 0.7164899710000014 | 0.0491500010000010 | F | F | F |
| 0.4194764704191268 | 0.8490625436661486 | 0.2496327369707037 | T | T | T |

|                    |                    |                    |   |   |   |
|--------------------|--------------------|--------------------|---|---|---|
| 0.5865600110000031 | 0.2164900000000003 | 0.0491500010000010 | F | F | F |
| 0.5869611299378478 | 0.3323049012445526 | 0.2331578154438097 | T | T | T |
| 0.5866329731351607 | 0.0675803391723433 | 0.2026556743771991 | T | T | T |
| 0.5865600110000031 | 0.9322999720000027 | 0.0000000000000000 | F | F | F |
| 0.4198899869999977 | 0.4323000010000015 | 0.0000000000000000 | F | F | F |
| 0.4197600453407427 | 0.5681556005542461 | 0.2026953296463328 | T | T | T |
| 0.4198899869999977 | 0.0732000020000001 | 0.0817899999999980 | F | F | F |
| 0.4148545380563221 | 0.2039048268217385 | 0.3075562893874282 | T | T | T |
| 0.5865600110000031 | 0.5731999870000024 | 0.0817899999999980 | F | F | F |
| 0.5868218579376904 | 0.7105910466822246 | 0.3043312030870277 | T | T | T |
| 0.5865600110000031 | 0.8573899869999977 | 0.1309400049999994 | F | F | F |
| 0.5868102041037671 | 0.9916658210196845 | 0.3366911746161363 | T | T | T |
| 0.4198899869999977 | 0.3573899869999977 | 0.1309400049999994 | F | F | F |
| 0.4215951515673488 | 0.5076926288852373 | 0.3480811479772906 | T | T | T |
| 0.7532299760000001 | 0.7164899710000014 | 0.0491500010000010 | F | F | F |
| 0.7542173964821487 | 0.8492533531727062 | 0.2495560608492991 | T | T | T |
| 0.9198899869999977 | 0.2164900000000003 | 0.0491500010000010 | F | F | F |
| 0.9185722327667909 | 0.3509279545478143 | 0.2504694064237331 | T | T | T |
| 0.9198139345444281 | 0.0712692710883812 | 0.2004892954141255 | T | T | T |
| 0.9198899869999977 | 0.9322999720000027 | 0.0000000000000000 | F | F | F |
| 0.7532299760000001 | 0.4323000010000015 | 0.0000000000000000 | F | F | F |
| 0.7539733513591065 | 0.5682248699292931 | 0.2026267020345496 | T | T | T |
| 0.7532299760000001 | 0.0732000020000001 | 0.0817899999999980 | F | F | F |
| 0.7593168992661391 | 0.2038477311613670 | 0.3075676198537374 | T | T | T |
| 0.9198899869999977 | 0.5731999870000024 | 0.0817899999999980 | F | F | F |

|                    |                    |                    |   |   |   |
|--------------------|--------------------|--------------------|---|---|---|
| 0.9214310054982184 | 0.7126462115080475 | 0.3020223958609641 | T | T | T |
| 0.9198899869999977 | 0.8573899869999977 | 0.1309400049999994 | F | F | F |
| 0.9269980140318086 | 0.9968308934503856 | 0.3339230914034304 | T | T | T |
| 0.7532299760000001 | 0.3573899869999977 | 0.1309400049999994 | F | F | F |
| 0.7528423138230483 | 0.5077291437996588 | 0.3478323888752317 | T | T | T |
| 0.5872295771123521 | 0.5345166795365454 | 0.3512956392500490 | T | T | T |
| 0.4770981344489215 | 0.3313074094473630 | 0.3736427169249417 | T | T | T |
| 0.6974144517718255 | 0.3314549460277766 | 0.3737038863330031 | T | T | T |

### Ni<sub>3,b</sub>:

1.0000000000000000

|                     |                     |                     |
|---------------------|---------------------|---------------------|
| 11.3280000686999998 | 0.0000000000000000  | 0.0000000000000000  |
| 0.0000000000000000  | 10.2098999023000001 | 0.0000000000000000  |
| 0.0000000000000000  | 0.0000000000000000  | 17.8448009491000015 |

Ti O Ni

24 48 3

Direct

|                    |                    |                    |   |   |   |
|--------------------|--------------------|--------------------|---|---|---|
| 0.0865600030000024 | 0.5369399790000031 | 0.0900399980000017 | F | F | F |
| 0.0862403589117341 | 0.6593212167251221 | 0.2891176084041654 | T | T | T |
| 0.2532300060000026 | 0.0369400009999978 | 0.0900399980000017 | F | F | F |
| 0.2498784370495144 | 0.1576900699503616 | 0.2881510486110699 | T | T | T |
| 0.2532300060000026 | 0.7527499790000007 | 0.0408900010000011 | F | F | F |
| 0.2535754937670350 | 0.8852124930284211 | 0.2495323117186579 | T | T | T |
| 0.0865600030000024 | 0.2527500090000032 | 0.0408900010000011 | F | F | F |

|                    |                    |                    |   |   |   |
|--------------------|--------------------|--------------------|---|---|---|
| 0.0862997785427329 | 0.3890873255870447 | 0.2491098976295254 | T | T | T |
| 0.4198899869999977 | 0.5369399790000031 | 0.0900399980000017 | F | F | F |
| 0.4214792042601978 | 0.6578363131594713 | 0.2897023910945171 | T | T | T |
| 0.5865600110000031 | 0.0369400009999978 | 0.0900399980000017 | F | F | F |
| 0.5865496617136225 | 0.1584148419944685 | 0.3014224898222450 | T | T | T |
| 0.5865600110000031 | 0.7527499790000007 | 0.0408900010000011 | F | F | F |
| 0.5862335914939147 | 0.8922653642535893 | 0.2475582191505102 | T | T | T |
| 0.4198899869999977 | 0.2527500090000032 | 0.0408900010000011 | F | F | F |
| 0.4207629135938086 | 0.3865480743757564 | 0.2438411684880916 | T | T | T |
| 0.7532299760000001 | 0.5369399790000031 | 0.0900399980000017 | F | F | F |
| 0.7511789849966897 | 0.6579837318480430 | 0.2898057625524106 | T | T | T |
| 0.9198899869999977 | 0.0369400009999978 | 0.0900399980000017 | F | F | F |
| 0.9229738593051400 | 0.1575404168371213 | 0.2883247632329762 | T | T | T |
| 0.9198899869999977 | 0.7527499790000007 | 0.0408900010000011 | F | F | F |
| 0.9190601915550188 | 0.8852704219135226 | 0.2496381362755168 | T | T | T |
| 0.7532299760000001 | 0.2527500090000032 | 0.0408900010000011 | F | F | F |
| 0.7520775983620868 | 0.3866720574046508 | 0.2439293196350718 | T | T | T |
| 0.0865600030000024 | 0.7164899710000014 | 0.0491500010000010 | F | F | F |
| 0.0862805771529808 | 0.8457326222337263 | 0.2482355063949639 | T | T | T |
| 0.2532300060000026 | 0.2164900000000003 | 0.0491500010000010 | F | F | F |
| 0.2531150896424898 | 0.3483495380001150 | 0.2488955518659318 | T | T | T |
| 0.2532243018524477 | 0.0686289302238668 | 0.2004777979893265 | T | T | T |
| 0.2532300060000026 | 0.9322999720000027 | 0.0000000000000000 | F | F | F |
| 0.0865600030000024 | 0.4323000010000015 | 0.0000000000000000 | F | F | F |
| 0.0861405466682167 | 0.5698265224722512 | 0.2009827432259995 | T | T | T |



|                    |                    |                    |   |   |   |
|--------------------|--------------------|--------------------|---|---|---|
| 0.0865600030000024 | 0.0732000020000001 | 0.0817899999999980 | F | F | F |
| 0.0863852985274511 | 0.2119677504762032 | 0.3027662584683876 | T | T | T |
| 0.2532300060000026 | 0.5731999870000024 | 0.0817899999999980 | F | F | F |
| 0.2530660121238587 | 0.7095473731880315 | 0.3028853158075171 | T | T | T |
| 0.2532300060000026 | 0.8573899869999977 | 0.1309400049999994 | F | F | F |
| 0.2515116134585242 | 0.9953795990749279 | 0.3339127250575113 | T | T | T |
| 0.0865600030000024 | 0.3573899869999977 | 0.1309400049999994 | F | F | F |
| 0.0862012069902354 | 0.4967333373218979 | 0.3344748062251593 | T | T | T |
| 0.4198899869999977 | 0.7164899710000014 | 0.0491500010000010 | F | F | F |
| 0.4197195079100787 | 0.8440785614161064 | 0.2494607657297175 | T | T | T |
| 0.5865600110000031 | 0.2164900000000003 | 0.0491500010000010 | F | F | F |
| 0.5864844916642835 | 0.3418426555681032 | 0.2416836118115498 | T | T | T |
| 0.5865736353159858 | 0.0670793265338080 | 0.2040480289371234 | T | T | T |
| 0.5865600110000031 | 0.9322999720000027 | 0.0000000000000000 | F | F | F |
| 0.4198899869999977 | 0.4323000010000015 | 0.0000000000000000 | F | F | F |
| 0.4188419343758969 | 0.5689724818989186 | 0.2009991542996639 | T | T | T |
| 0.4198899869999977 | 0.0732000020000001 | 0.0817899999999980 | F | F | F |
| 0.4150398428690413 | 0.2101650905086767 | 0.3039937308422217 | T | T | T |
| 0.5865600110000031 | 0.5731999870000024 | 0.0817899999999980 | F | F | F |
| 0.5863073468435339 | 0.7079403499863376 | 0.3025228130950002 | T | T | T |
| 0.5865600110000031 | 0.8573899869999977 | 0.1309400049999994 | F | F | F |
| 0.5862676997491462 | 0.9889099071943942 | 0.3376114890517526 | T | T | T |
| 0.4198899869999977 | 0.3573899869999977 | 0.1309400049999994 | F | F | F |
| 0.4266118370476336 | 0.4952533263383053 | 0.3380864654700783 | T | T | T |
| 0.7532299760000001 | 0.7164899710000014 | 0.0491500010000010 | F | F | F |

|                    |                    |                    |   |   |   |
|--------------------|--------------------|--------------------|---|---|---|
| 0.7529661322910411 | 0.8440524261175093 | 0.2494624268553539 | T | T | T |
| 0.9198899869999977 | 0.2164900000000003 | 0.0491500010000010 | F | F | F |
| 0.9196425161368529 | 0.3482981378739433 | 0.2489319662212803 | T | T | T |
| 0.9196616950488206 | 0.0686150548940108 | 0.2005756749108223 | T | T | T |
| 0.9198899869999977 | 0.9322999720000027 | 0.0000000000000000 | F | F | F |
| 0.7532299760000001 | 0.4323000010000015 | 0.0000000000000000 | F | F | F |
| 0.7543427734066769 | 0.5690092789404404 | 0.2010822280660232 | T | T | T |
| 0.7532299760000001 | 0.0732000020000001 | 0.0817899999999980 | F | F | F |
| 0.7579654620610544 | 0.2104291340079002 | 0.3044131123437786 | T | T | T |
| 0.9198899869999977 | 0.5731999870000024 | 0.0817899999999980 | F | F | F |
| 0.9195607500959905 | 0.7097224977609590 | 0.3031835082499559 | T | T | T |
| 0.9198899869999977 | 0.8573899869999977 | 0.1309400049999994 | F | F | F |
| 0.9209565161774139 | 0.9953117174360966 | 0.3340826695153293 | T | T | T |
| 0.7532299760000001 | 0.3573899869999977 | 0.1309400049999994 | F | F | F |
| 0.7458725483576920 | 0.4953511979631627 | 0.3381272782530199 | T | T | T |
| 0.5858861462235414 | 0.1935711878907127 | 0.4504663656718023 | T | T | T |
| 0.4782045019770420 | 0.3343455625009124 | 0.3818977498900357 | T | T | T |
| 0.6939029379004724 | 0.3346161508330346 | 0.3821984379448152 | T | T | T |

**Ni<sub>3,c</sub>:**

1.0000000000000000

|                     |                     |                     |
|---------------------|---------------------|---------------------|
| 11.3280000686999998 | 0.0000000000000000  | 0.0000000000000000  |
| 0.0000000000000000  | 10.2098999023000001 | 0.0000000000000000  |
| 0.0000000000000000  | 0.0000000000000000  | 17.8448009491000015 |

Ti O Ni

24 48 3

Direct

|                    |                    |                    |   |   |   |
|--------------------|--------------------|--------------------|---|---|---|
| 0.0865600030000024 | 0.5369399790000031 | 0.0900399980000017 | F | F | F |
| 0.0873585855809512 | 0.6595447510948866 | 0.2882367585750230 | T | T | T |
| 0.2532300060000026 | 0.0369400009999978 | 0.0900399980000017 | F | F | F |
| 0.2540603151230703 | 0.1608501292114976 | 0.2891538338588675 | T | T | T |
| 0.2532300060000026 | 0.7527499790000007 | 0.0408900010000011 | F | F | F |
| 0.2514015105866614 | 0.8918272421487410 | 0.2489417760867741 | T | T | T |
| 0.0865600030000024 | 0.2527500090000032 | 0.0408900010000011 | F | F | F |
| 0.0874296226583962 | 0.3874629639735849 | 0.2491326832906858 | T | T | T |
| 0.4198899869999977 | 0.5369399790000031 | 0.0900399980000017 | F | F | F |
| 0.4146975691018291 | 0.6669332734088397 | 0.2887408475305571 | T | T | T |
| 0.5865600110000031 | 0.0369400009999978 | 0.0900399980000017 | F | F | F |
| 0.5872013490686211 | 0.1559504993928141 | 0.2915403565139734 | T | T | T |
| 0.5865600110000031 | 0.7527499790000007 | 0.0408900010000011 | F | F | F |
| 0.5873253977695682 | 0.8893008773796175 | 0.2418875610909056 | T | T | T |
| 0.4198899869999977 | 0.2527500090000032 | 0.0408900010000011 | F | F | F |
| 0.4204313844248055 | 0.3895643473267434 | 0.2500795407498269 | T | T | T |
| 0.7532299760000001 | 0.5369399790000031 | 0.0900399980000017 | F | F | F |
| 0.7601454824458074 | 0.6669163934452892 | 0.2888882387603970 | T | T | T |
| 0.9198899869999977 | 0.0369400009999978 | 0.0900399980000017 | F | F | F |
| 0.9201040619152534 | 0.1609409369038264 | 0.2891554045281370 | T | T | T |
| 0.9198899869999977 | 0.7527499790000007 | 0.0408900010000011 | F | F | F |
| 0.9231586903908561 | 0.8919359934410581 | 0.2490590682981219 | T | T | T |

|                    |                     |                    |   |   |   |
|--------------------|---------------------|--------------------|---|---|---|
| 0.7532299760000001 | 0.2527500090000032  | 0.0408900010000011 | F | F | F |
| 0.7543169871703763 | 0.3897458506496763  | 0.2500084817463259 | T | T | T |
| 0.0865600030000024 | 0.7164899710000014  | 0.0491500010000010 | F | F | F |
| 0.0872681792209184 | 0.8483611212718608  | 0.2455911159847075 | T | T | T |
| 0.2532300060000026 | 0.2164900000000003  | 0.0491500010000010 | F | F | F |
| 0.2538012770117757 | 0.3471812409641523  | 0.2488646926739319 | T | T | T |
| 0.2538227446922961 | 0.0714823577207500  | 0.2008353571881498 | T | T | T |
| 0.2532300060000026 | 0.9322999720000027  | 0.0000000000000000 | F | F | F |
| 0.0865600030000024 | 0.4323000010000015  | 0.0000000000000000 | F | F | F |
| 0.0870330897145052 | 0.5701807791574188  | 0.2004792355144179 | T | T | T |
| 0.0865600030000024 | 0.0732000020000001  | 0.0817899999999980 | F | F | F |
| 0.0872309610333942 | 0.2130141216858564  | 0.3027301914937829 | T | T | T |
| 0.2532300060000026 | 0.5731999870000024  | 0.0817899999999980 | F | F | F |
| 0.2506791981527296 | 0.7150099528734114  | 0.3034165163951317 | T | T | T |
| 0.2532300060000026 | 0.8573899869999977  | 0.1309400049999994 | F | F | F |
| 0.2499602607126873 | -0.0014245512797570 | 0.3345550351151129 | T | T | T |
| 0.0865600030000024 | 0.3573899869999977  | 0.1309400049999994 | F | F | F |
| 0.0878059950014896 | 0.4979250762312339  | 0.3339606920444362 | T | T | T |
| 0.4198899869999977 | 0.7164899710000014  | 0.0491500010000010 | F | F | F |
| 0.4176155048548706 | 0.8514888440744500  | 0.2481449157724381 | T | T | T |
| 0.5865600110000031 | 0.2164900000000003  | 0.0491500010000010 | F | F | F |
| 0.5872859985679828 | 0.3456634975480619  | 0.2546401415331823 | T | T | T |
| 0.5870670380077285 | 0.0734849028574655  | 0.2010304013333966 | T | T | T |
| 0.5865600110000031 | 0.9322999720000027  | 0.0000000000000000 | F | F | F |
| 0.4198899869999977 | 0.4323000010000015  | 0.0000000000000000 | F | F | F |

|                    |                     |                    |   |   |   |
|--------------------|---------------------|--------------------|---|---|---|
| 0.4171411683713992 | 0.5650206350908574  | 0.2021352606614772 | T | T | T |
| 0.4198899869999977 | 0.0732000020000001  | 0.0817899999999980 | F | F | F |
| 0.4205056653498060 | 0.2078782398588961  | 0.3035907945358667 | T | T | T |
| 0.5865600110000031 | 0.5731999870000024  | 0.0817899999999980 | F | F | F |
| 0.5874053509353547 | 0.7073297632497172  | 0.2810175194406029 | T | T | T |
| 0.5865600110000031 | 0.8573899869999977  | 0.1309400049999994 | F | F | F |
| 0.5873472914986171 | 0.9880316230996383  | 0.3377631286216487 | T | T | T |
| 0.4198899869999977 | 0.3573899869999977  | 0.1309400049999994 | F | F | F |
| 0.4126324883396247 | 0.4926702293149772  | 0.3385456819189199 | T | T | T |
| 0.7532299760000001 | 0.7164899710000014  | 0.0491500010000010 | F | F | F |
| 0.7570574361511810 | 0.8515092814633795  | 0.2482967214929917 | T | T | T |
| 0.9198899869999977 | 0.2164900000000003  | 0.0491500010000010 | F | F | F |
| 0.9207130221232269 | 0.3473904324128087  | 0.2490092652876756 | T | T | T |
| 0.9202290183311648 | 0.0715832977608789  | 0.2008584888244681 | T | T | T |
| 0.9198899869999977 | 0.9322999720000027  | 0.0000000000000000 | F | F | F |
| 0.7532299760000001 | 0.4323000010000015  | 0.0000000000000000 | F | F | F |
| 0.7576861976475915 | 0.5651967687625180  | 0.2021053434891741 | T | T | T |
| 0.7532299760000001 | 0.0732000020000001  | 0.0817899999999980 | F | F | F |
| 0.7539788931251955 | 0.2079100259399404  | 0.3035512412498694 | T | T | T |
| 0.9198899869999977 | 0.5731999870000024  | 0.0817899999999980 | F | F | F |
| 0.9240859690048607 | 0.7149935089287811  | 0.3035756577926957 | T | T | T |
| 0.9198899869999977 | 0.8573899869999977  | 0.1309400049999994 | F | F | F |
| 0.9247413194744271 | -0.0012711413024130 | 0.3345786606895762 | T | T | T |
| 0.7532299760000001 | 0.3573899869999977  | 0.1309400049999994 | F | F | F |
| 0.7619077352554566 | 0.4926697073388647  | 0.3385329140382294 | T | T | T |

|                    |                    |                    |   |   |   |
|--------------------|--------------------|--------------------|---|---|---|
| 0.5872460515709463 | 0.8059115056996193 | 0.3782140328925498 | T | T | T |
| 0.4890532790868581 | 0.5985221026219211 | 0.4094419248509844 | T | T | T |
| 0.6851917676653297 | 0.5983730459305634 | 0.4093904202862368 | T | T | T |

**Ni<sub>3,d</sub>:**

1.00000000000000

|                     |                     |                     |
|---------------------|---------------------|---------------------|
| 11.3280000686999998 | 0.0000000000000000  | 0.0000000000000000  |
| 0.0000000000000000  | 10.2098999023000001 | 0.0000000000000000  |
| 0.0000000000000000  | 0.0000000000000000  | 17.8448009491000015 |

Ti O Ni

24 48 3

Direct

|                    |                    |                    |   |   |   |
|--------------------|--------------------|--------------------|---|---|---|
| 0.0865600030000024 | 0.5369399790000031 | 0.0900399980000017 | F | F | F |
| 0.0805048386114484 | 0.6669391254641293 | 0.2871491580836877 | T | T | T |
| 0.2532300060000026 | 0.0369400009999978 | 0.0900399980000017 | F | F | F |
| 0.2537884283059347 | 0.1594427762020922 | 0.2888421100063023 | T | T | T |
| 0.2532300060000026 | 0.7527499790000007 | 0.0408900010000011 | F | F | F |
| 0.2527720820046895 | 0.8902857690863538 | 0.2472975860231214 | T | T | T |
| 0.0865600030000024 | 0.2527500090000032 | 0.0408900010000011 | F | F | F |
| 0.0860244450127613 | 0.3880424145961663 | 0.2485393388979992 | T | T | T |
| 0.4198899869999977 | 0.5369399790000031 | 0.0900399980000017 | F | F | F |
| 0.4216900038102134 | 0.6650982263186613 | 0.2931152592665923 | T | T | T |
| 0.5865600110000031 | 0.0369400009999978 | 0.0900399980000017 | F | F | F |
| 0.5872012170326605 | 0.1597316731579217 | 0.2888296385164617 | T | T | T |

|                    |                    |                    |   |   |   |
|--------------------|--------------------|--------------------|---|---|---|
| 0.5865600110000031 | 0.7527499790000007 | 0.0408900010000011 | F | F | F |
| 0.5867244482675273 | 0.8918973608344896 | 0.2469859432802937 | T | T | T |
| 0.4198899869999977 | 0.2527500090000032 | 0.0408900010000011 | F | F | F |
| 0.4212687800834358 | 0.3840397666333344 | 0.2432073570654789 | T | T | T |
| 0.7532299760000001 | 0.5369399790000031 | 0.0900399980000017 | F | F | F |
| 0.7549034789819850 | 0.6648051714830929 | 0.2878500411076099 | T | T | T |
| 0.9198899869999977 | 0.0369400009999978 | 0.0900399980000017 | F | F | F |
| 0.9200663360239700 | 0.1609962664281341 | 0.2890965097358332 | T | T | T |
| 0.9198899869999977 | 0.7527499790000007 | 0.0408900010000011 | F | F | F |
| 0.9182832420626404 | 0.8919400524000277 | 0.2479807122028412 | T | T | T |
| 0.7532299760000001 | 0.2527500090000032 | 0.0408900010000011 | F | F | F |
| 0.7537181830262015 | 0.3869304379382791 | 0.2472274281559522 | T | T | T |
| 0.0865600030000024 | 0.7164899710000014 | 0.0491500010000010 | F | F | F |
| 0.0852965655953522 | 0.8496382683012051 | 0.2461403478999966 | T | T | T |
| 0.2532300060000026 | 0.2164900000000003 | 0.0491500010000010 | F | F | F |
| 0.2545203247314313 | 0.3502237033088766 | 0.2515454132986799 | T | T | T |
| 0.2537486533423854 | 0.0703919441073626 | 0.2004643110656350 | T | T | T |
| 0.2532300060000026 | 0.9322999720000027 | 0.0000000000000000 | F | F | F |
| 0.0865600030000024 | 0.4323000010000015 | 0.0000000000000000 | F | F | F |
| 0.0881729455210198 | 0.5697286450959925 | 0.2013475079274631 | T | T | T |
| 0.0865600030000024 | 0.0732000020000001 | 0.0817899999999980 | F | F | F |
| 0.0866772342816832 | 0.2113455931206004 | 0.3012972592358110 | T | T | T |
| 0.2532300060000026 | 0.5731999870000024 | 0.0817899999999980 | F | F | F |
| 0.2530661655965303 | 0.7188658476977487 | 0.3064026152005970 | T | T | T |
| 0.2532300060000026 | 0.8573899869999977 | 0.1309400049999994 | F | F | F |

|                    |                    |                    |   |   |   |
|--------------------|--------------------|--------------------|---|---|---|
| 0.2530781847089019 | 0.9977275709693078 | 0.3338395998302421 | T | T | T |
| 0.0865600030000024 | 0.3573899869999977 | 0.1309400049999994 | F | F | F |
| 0.0796932572047540 | 0.4930623325609975 | 0.3376776605976403 | T | T | T |
| 0.4198899869999977 | 0.7164899710000014 | 0.0491500010000010 | F | F | F |
| 0.4202005267435196 | 0.8445133431044071 | 0.2474359004213812 | T | T | T |
| 0.5865600110000031 | 0.2164900000000003 | 0.0491500010000010 | F | F | F |
| 0.5877438814015108 | 0.3441327046212569 | 0.2450676133766856 | T | T | T |
| 0.5873004768055493 | 0.0700262782764791 | 0.2003941951838298 | T | T | T |
| 0.5865600110000031 | 0.9322999720000027 | 0.0000000000000000 | F | F | F |
| 0.4198899869999977 | 0.4323000010000015 | 0.0000000000000000 | F | F | F |
| 0.4190659325450459 | 0.5675639833919437 | 0.2049388768654852 | T | T | T |
| 0.4198899869999977 | 0.0732000020000001 | 0.0817899999999980 | F | F | F |
| 0.4205981591668855 | 0.2064933334559010 | 0.2988882606511623 | T | T | T |
| 0.5865600110000031 | 0.5731999870000024 | 0.0817899999999980 | F | F | F |
| 0.5893692459874519 | 0.7235608887261599 | 0.3088512340576250 | T | T | T |
| 0.5865600110000031 | 0.8573899869999977 | 0.1309400049999994 | F | F | F |
| 0.5877701798731697 | 0.9982509808012509 | 0.3339204862852390 | T | T | T |
| 0.4198899869999977 | 0.3573899869999977 | 0.1309400049999994 | F | F | F |
| 0.4447702008958468 | 0.4698510324126688 | 0.3418744187649017 | T | T | T |
| 0.7532299760000001 | 0.7164899710000014 | 0.0491500010000010 | F | F | F |
| 0.7535429503923273 | 0.8495475308801956 | 0.2446152828329441 | T | T | T |
| 0.9198899869999977 | 0.2164900000000003 | 0.0491500010000010 | F | F | F |
| 0.9200262802448679 | 0.3500233291885899 | 0.2488602818524125 | T | T | T |
| 0.9193815681100406 | 0.0723850873784417 | 0.2006484157988768 | T | T | T |
| 0.9198899869999977 | 0.9322999720000027 | 0.0000000000000000 | F | F | F |



|                    |                     |                    |   |   |   |
|--------------------|---------------------|--------------------|---|---|---|
| 0.7532299760000001 | 0.4323000010000015  | 0.0000000000000000 | F | F | F |
| 0.7516644937205521 | 0.5706676245056791  | 0.2010120349960191 | T | T | T |
| 0.7532299760000001 | 0.0732000020000001  | 0.0817899999999980 | F | F | F |
| 0.7538889453010955 | 0.2125299020801616  | 0.3022794077972984 | T | T | T |
| 0.9198899869999977 | 0.5731999870000024  | 0.0817899999999980 | F | F | F |
| 0.9177391137817149 | 0.7164585506284011  | 0.3049239243277274 | T | T | T |
| 0.9198899869999977 | 0.8573899869999977  | 0.1309400049999994 | F | F | F |
| 0.9189719719396496 | -0.0010252994367993 | 0.3340582668995460 | T | T | T |
| 0.7532299760000001 | 0.3573899869999977  | 0.1309400049999994 | F | F | F |
| 0.7491913982487312 | 0.4931390607184442  | 0.3362928864673168 | T | T | T |
| 0.2237253213704826 | 0.5682760017048075  | 0.3645522090083393 | T | T | T |
| 0.4026019050308974 | 0.5530076494790692  | 0.4252059432196548 | T | T | T |
| 0.5936898071054815 | 0.5588909791235760  | 0.3580786314112296 | T | T | T |

**Ni<sub>3,A</sub>:**

1.0000000000000000

|                     |                     |                     |
|---------------------|---------------------|---------------------|
| 11.3280000686999998 | 0.0000000000000000  | 0.0000000000000000  |
| 0.0000000000000000  | 10.2098999023000001 | 0.0000000000000000  |
| 0.0000000000000000  | 0.0000000000000000  | 17.8448009491000015 |

Ti O Ni

24 47 3

Direct

|                    |                    |                    |   |   |   |
|--------------------|--------------------|--------------------|---|---|---|
| 0.0865600030000024 | 0.5369399790000031 | 0.0900399980000017 | F | F | F |
| 0.0841361807653990 | 0.6631938403547981 | 0.2884269510107254 | T | T | T |

|                    |                    |                    |   |   |   |
|--------------------|--------------------|--------------------|---|---|---|
| 0.2532300060000026 | 0.0369400009999978 | 0.0900399980000017 | F | F | F |
| 0.2523932506611918 | 0.1559926436223300 | 0.2895384601949388 | T | T | T |
| 0.2532300060000026 | 0.7527499790000007 | 0.0408900010000011 | F | F | F |
| 0.2511554780254937 | 0.8875614884866686 | 0.2464948774522945 | T | T | T |
| 0.0865600030000024 | 0.2527500090000032 | 0.0408900010000011 | F | F | F |
| 0.0836505423789499 | 0.3913507057621641 | 0.2494879740769975 | T | T | T |
| 0.4198899869999977 | 0.5369399790000031 | 0.0900399980000017 | F | F | F |
| 0.4203166979348189 | 0.6676266515390850 | 0.2909066740981069 | T | T | T |
| 0.5865600110000031 | 0.0369400009999978 | 0.0900399980000017 | F | F | F |
| 0.5871212746397014 | 0.1551590474222035 | 0.2897656792044924 | T | T | T |
| 0.5865600110000031 | 0.7527499790000007 | 0.0408900010000011 | F | F | F |
| 0.5871744103305491 | 0.8883762712291036 | 0.2453991884723031 | T | T | T |
| 0.4198899869999977 | 0.2527500090000032 | 0.0408900010000011 | F | F | F |
| 0.4200189306383457 | 0.3811402205299262 | 0.2379431592627020 | T | T | T |
| 0.7532299760000001 | 0.5369399790000031 | 0.0900399980000017 | F | F | F |
| 0.7550006707121246 | 0.6636958736760228 | 0.2879317634305809 | T | T | T |
| 0.9198899869999977 | 0.0369400009999978 | 0.0900399980000017 | F | F | F |
| 0.9189982840107387 | 0.1602970331011161 | 0.2891470953885449 | T | T | T |
| 0.9198899869999977 | 0.7527499790000007 | 0.0408900010000011 | F | F | F |
| 0.9192042448783027 | 0.8915026840786597 | 0.2475846260163398 | T | T | T |
| 0.7532299760000001 | 0.2527500090000032 | 0.0408900010000011 | F | F | F |
| 0.7542267604005459 | 0.3891909359088580 | 0.2457571459114416 | T | T | T |
| 0.0865600030000024 | 0.7164899710000014 | 0.0491500010000010 | F | F | F |
| 0.0840170107238745 | 0.8504284885856087 | 0.2471441048377361 | T | T | T |
| 0.2532300060000026 | 0.2164900000000003 | 0.0491500010000010 | F | F | F |

|                    |                     |                    |   |   |   |
|--------------------|---------------------|--------------------|---|---|---|
| 0.2550580816445125 | 0.3610322455279473  | 0.2679970592526459 | T | T | T |
| 0.2504540724233462 | 0.0732550298096424  | 0.1999886592512767 | T | T | T |
| 0.2532300060000026 | 0.9322999720000027  | 0.0000000000000000 | F | F | F |
| 0.0865600030000024 | 0.4323000010000015  | 0.0000000000000000 | F | F | F |
| 0.0826843985036769 | 0.5707721422533101  | 0.2011286558737456 | T | T | T |
| 0.0865600030000024 | 0.0732000020000001  | 0.0817899999999980 | F | F | F |
| 0.0851065333425672 | 0.2128130451374878  | 0.2977449767984855 | T | T | T |
| 0.2532300060000026 | 0.5731999870000024  | 0.0817899999999980 | F | F | F |
| 0.2492356037404257 | 0.7158346490022987  | 0.2996315692831503 | T | T | T |
| 0.2532300060000026 | 0.8573899869999977  | 0.1309400049999994 | F | F | F |
| 0.2505193838307530 | -0.0034797459877456 | 0.3342547957493044 | T | T | T |
| 0.0865600030000024 | 0.3573899869999977  | 0.1309400049999994 | F | F | F |
| 0.0919639832522186 | 0.5035078458763103  | 0.3365033099106014 | T | T | T |
| 0.4198899869999977 | 0.7164899710000014  | 0.0491500010000010 | F | F | F |
| 0.4189801786916568 | 0.8500562692825597  | 0.2490317208074492 | T | T | T |
| 0.5865600110000031 | 0.2164900000000003  | 0.0491500010000010 | F | F | F |
| 0.5858043199835994 | 0.3537767814779310  | 0.2550457975838713 | T | T | T |
| 0.5901793185917505 | 0.0733283995385656  | 0.1997619137696868 | T | T | T |
| 0.5865600110000031 | 0.9322999720000027  | 0.0000000000000000 | F | F | F |
| 0.4198899869999977 | 0.4323000010000015  | 0.0000000000000000 | F | F | F |
| 0.4195139769861395 | 0.5653260532355252  | 0.2029604867640907 | T | T | T |
| 0.4198899869999977 | 0.0732000020000001  | 0.0817899999999980 | F | F | F |
| 0.4201516484988191 | 0.2033125648566838  | 0.2943649537767091 | T | T | T |
| 0.5865600110000031 | 0.5731999870000024  | 0.0817899999999980 | F | F | F |
| 0.5898667318826427 | 0.7194240402161517  | 0.2979867420534271 | T | T | T |

|                    |                     |                    |   |   |   |
|--------------------|---------------------|--------------------|---|---|---|
| 0.5865600110000031 | 0.8573899869999977  | 0.1309400049999994 | F | F | F |
| 0.5882810388430433 | -0.0045433361335166 | 0.3339565160230425 | T | T | T |
| 0.4198899869999977 | 0.3573899869999977  | 0.1309400049999994 | F | F | F |
| 0.7532299760000001 | 0.7164899710000014  | 0.0491500010000010 | F | F | F |
| 0.7547135350827686 | 0.8495510704193330  | 0.2464124730343018 | T | T | T |
| 0.9198899869999977 | 0.2164900000000003  | 0.0491500010000010 | F | F | F |
| 0.9186403050024697 | 0.3589655122025172  | 0.2557720760069963 | T | T | T |
| 0.9182593280920660 | 0.0729755795707699  | 0.2005753979452884 | T | T | T |
| 0.9198899869999977 | 0.9322999720000027  | 0.0000000000000000 | F | F | F |
| 0.7532299760000001 | 0.4323000010000015  | 0.0000000000000000 | F | F | F |
| 0.7612161037273906 | 0.5704839461937854  | 0.2009351980731928 | T | T | T |
| 0.7532299760000001 | 0.0732000020000001  | 0.0817899999999980 | F | F | F |
| 0.7533063697336607 | 0.2149381208792172  | 0.3001352017764284 | T | T | T |
| 0.9198899869999977 | 0.5731999870000024  | 0.0817899999999980 | F | F | F |
| 0.9185613747776542 | 0.7138284196262434  | 0.3043578867701784 | T | T | T |
| 0.9198899869999977 | 0.8573899869999977  | 0.1309400049999994 | F | F | F |
| 0.9190780358942393 | 0.0002061926269801  | 0.3343984286525048 | T | T | T |
| 0.7532299760000001 | 0.3573899869999977  | 0.1309400049999994 | F | F | F |
| 0.7270234191725293 | 0.5039776116413964  | 0.3362608047920426 | T | T | T |
| 0.3282029774378598 | 0.4655879404832182  | 0.3486187341414144 | T | T | T |
| 0.5453483087322798 | 0.4687492251102774  | 0.3417783101499723 | T | T | T |
| 0.4390449529292342 | 0.6044696561464089  | 0.4176296282242674 | T | T | T |

**Ni<sub>3,B</sub>:**

1.00000000000000

|                     |                     |                     |
|---------------------|---------------------|---------------------|
| 11.3280000686999998 | 0.0000000000000000  | 0.0000000000000000  |
| 0.0000000000000000  | 10.2098999023000001 | 0.0000000000000000  |
| 0.0000000000000000  | 0.0000000000000000  | 17.8448009491000015 |

Ti O Ni

24 47 3

Direct

|                    |                    |                    |   |   |   |
|--------------------|--------------------|--------------------|---|---|---|
| 0.0865600030000024 | 0.5369399790000031 | 0.0900399980000017 | F | F | F |
| 0.0829794834672602 | 0.6586003225056501 | 0.2889493051818878 | T | T | T |
| 0.2532300060000026 | 0.0369400009999978 | 0.0900399980000017 | F | F | F |
| 0.2519515400388097 | 0.1564461383606899 | 0.2917187470700515 | T | T | T |
| 0.2532300060000026 | 0.7527499790000007 | 0.0408900010000011 | F | F | F |
| 0.2487937741486722 | 0.8906414040812887 | 0.2475481419283267 | T | T | T |
| 0.0865600030000024 | 0.2527500090000032 | 0.0408900010000011 | F | F | F |
| 0.0909080822924688 | 0.3847583908928882 | 0.2463665126800089 | T | T | T |
| 0.4198899869999977 | 0.5369399790000031 | 0.0900399980000017 | F | F | F |
| 0.4192129878693581 | 0.6789048178018523 | 0.2842052208940040 | T | T | T |
| 0.5865600110000031 | 0.0369400009999978 | 0.0900399980000017 | F | F | F |
| 0.5874102038475251 | 0.1563637682271625 | 0.2916733959131945 | T | T | T |
| 0.5865600110000031 | 0.7527499790000007 | 0.0408900010000011 | F | F | F |
| 0.5905050011476274 | 0.8903823422355832 | 0.2477010842631864 | T | T | T |
| 0.4198899869999977 | 0.2527500090000032 | 0.0408900010000011 | F | F | F |
| 0.4196232973682693 | 0.3952857874159400 | 0.2424314481653377 | T | T | T |
| 0.7532299760000001 | 0.5369399790000031 | 0.0900399980000017 | F | F | F |
| 0.7561052922469367 | 0.6583605369933410 | 0.2891009172215795 | T | T | T |

|                    |                     |                    |   |   |   |
|--------------------|---------------------|--------------------|---|---|---|
| 0.9198899869999977 | 0.0369400009999978  | 0.0900399980000017 | F | F | F |
| 0.9198115738808289 | 0.1619193079262650  | 0.2897293273925622 | T | T | T |
| 0.9198899869999977 | 0.7527499790000007  | 0.0408900010000011 | F | F | F |
| 0.9196175181058613 | 0.8910697087191847  | 0.2481713560319554 | T | T | T |
| 0.7532299760000001 | 0.2527500090000032  | 0.0408900010000011 | F | F | F |
| 0.7487193757529341 | 0.3847864249855570  | 0.2465314670005600 | T | T | T |
| 0.0865600030000024 | 0.7164899710000014  | 0.0491500010000010 | F | F | F |
| 0.0832071059079300 | 0.8421055625611354  | 0.2468358257007043 | T | T | T |
| 0.2532300060000026 | 0.2164900000000003  | 0.0491500010000010 | F | F | F |
| 0.2561127429390249 | 0.3377418579803683  | 0.2430948328630626 | T | T | T |
| 0.2552094483253037 | 0.0695266943993320  | 0.2018890261296429 | T | T | T |
| 0.2532300060000026 | 0.9322999720000027  | 0.0000000000000000 | F | F | F |
| 0.0865600030000024 | 0.4323000010000015  | 0.0000000000000000 | F | F | F |
| 0.0774162292739756 | 0.5683134481141958  | 0.2016794636099152 | T | T | T |
| 0.0865600030000024 | 0.0732000020000001  | 0.0817899999999980 | F | F | F |
| 0.0864259646089275 | 0.2133959356721861  | 0.3027193611103751 | T | T | T |
| 0.2532300060000026 | 0.5731999870000024  | 0.0817899999999980 | F | F | F |
| 0.2503647553657286 | 0.7148529776375638  | 0.3044295062240135 | T | T | T |
| 0.2532300060000026 | 0.8573899869999977  | 0.1309400049999994 | F | F | F |
| 0.2405941410223784 | -0.0069159225900842 | 0.3347183027087291 | T | T | T |
| 0.0865600030000024 | 0.3573899869999977  | 0.1309400049999994 | F | F | F |
| 0.1217688583003059 | 0.4977287058493179  | 0.3342544765501798 | T | T | T |
| 0.4198899869999977 | 0.7164899710000014  | 0.0491500010000010 | F | F | F |
| 0.4196241575881817 | 0.8594485540878503  | 0.2489799094681036 | T | T | T |
| 0.5865600110000031 | 0.2164900000000003  | 0.0491500010000010 | F | F | F |

|                    |                     |                    |   |   |   |
|--------------------|---------------------|--------------------|---|---|---|
| 0.5832848109141017 | 0.3381869264280591  | 0.2435799417668897 | T | T | T |
| 0.5840821243866026 | 0.0693896378222884  | 0.2019236244505606 | T | T | T |
| 0.5865600110000031 | 0.9322999720000027  | 0.0000000000000000 | F | F | F |
| 0.4198899869999977 | 0.4323000010000015  | 0.0000000000000000 | F | F | F |
| 0.4195138332326935 | 0.5705239803643418  | 0.2008741683311616 | T | T | T |
| 0.4198899869999977 | 0.0732000020000001  | 0.0817899999999980 | F | F | F |
| 0.4196789066394601 | 0.1928765235870374  | 0.3165186508019141 | T | T | T |
| 0.5865600110000031 | 0.5731999870000024  | 0.0817899999999980 | F | F | F |
| 0.5885946096962492 | 0.7141111937346609  | 0.3044616815582988 | T | T | T |
| 0.5865600110000031 | 0.8573899869999977  | 0.1309400049999994 | F | F | F |
| 0.5985699484162984 | -0.0069939450769678 | 0.3347541307715243 | T | T | T |
| 0.4198899869999977 | 0.3573899869999977  | 0.1309400049999994 | F | F | F |
| 0.7532299760000001 | 0.7164899710000014  | 0.0491500010000010 | F | F | F |
| 0.7560936487744914 | 0.8421566446816939  | 0.2469590140772124 | T | T | T |
| 0.9198899869999977 | 0.2164900000000003  | 0.0491500010000010 | F | F | F |
| 0.9198257584634901 | 0.3551662782891759  | 0.2554389820090538 | T | T | T |
| 0.9199013536632592 | 0.0714620195545193  | 0.2014342448079319 | T | T | T |
| 0.9198899869999977 | 0.9322999720000027  | 0.0000000000000000 | F | F | F |
| 0.7532299760000001 | 0.4323000010000015  | 0.0000000000000000 | F | F | F |
| 0.7615501631714700 | 0.5683726258118937  | 0.2017300047301066 | T | T | T |
| 0.7532299760000001 | 0.0732000020000001  | 0.0817899999999980 | F | F | F |
| 0.7530822213797872 | 0.2130811864022439  | 0.3025367427352151 | T | T | T |
| 0.9198899869999977 | 0.5731999870000024  | 0.0817899999999980 | F | F | F |
| 0.9197062744729375 | 0.7048986660375981  | 0.3074223239180186 | T | T | T |
| 0.9198899869999977 | 0.8573899869999977  | 0.1309400049999994 | F | F | F |

|                    |                     |                    |   |   |   |
|--------------------|---------------------|--------------------|---|---|---|
| 0.9196633847466875 | -0.0013791350502029 | 0.3340293269494147 | T | T | T |
| 0.7532299760000001 | 0.3573899869999977  | 0.1309400049999994 | F | F | F |
| 0.7190536645627456 | 0.4974241249824965  | 0.3344219146792247 | T | T | T |
| 0.4191226489688070 | 0.3504925191434503  | 0.3703160376592408 | T | T | T |
| 0.5279656659859578 | 0.5384684977099853  | 0.3575532075102807 | T | T | T |
| 0.3094668713639556 | 0.5378058730787197  | 0.3574583410713214 | T | T | T |

**Ni<sub>3</sub>C:**

1.00000000000000

|                     |                     |                     |
|---------------------|---------------------|---------------------|
| 11.3280000686999998 | 0.0000000000000000  | 0.0000000000000000  |
| 0.0000000000000000  | 10.2098999023000001 | 0.0000000000000000  |
| 0.0000000000000000  | 0.0000000000000000  | 17.8448009491000015 |

Ti O Ni

24 47 3

Direct

|                    |                    |                    |   |   |   |
|--------------------|--------------------|--------------------|---|---|---|
| 0.0865600030000024 | 0.5369399790000031 | 0.0900399980000017 | F | F | F |
| 0.0860062836046764 | 0.6594562426025677 | 0.2888962326987626 | T | T | T |
| 0.2532300060000026 | 0.0369400009999978 | 0.0900399980000017 | F | F | F |
| 0.2521419552141296 | 0.1597054769439984 | 0.2909718107092845 | T | T | T |
| 0.2532300060000026 | 0.7527499790000007 | 0.0408900010000011 | F | F | F |
| 0.2506974106741444 | 0.8901250633189527 | 0.2485530834014756 | T | T | T |
| 0.0865600030000024 | 0.2527500090000032 | 0.0408900010000011 | F | F | F |
| 0.0874804956214452 | 0.3882996099739605 | 0.2478019430917534 | T | T | T |
| 0.4198899869999977 | 0.5369399790000031 | 0.0900399980000017 | F | F | F |



|                    |                    |                    |   |   |   |
|--------------------|--------------------|--------------------|---|---|---|
| 0.4191544269486108 | 0.6724054697847779 | 0.2927844613573028 | T | T | T |
| 0.5865600110000031 | 0.0369400009999978 | 0.0900399980000017 | F | F | F |
| 0.5884032652015873 | 0.1587234985618622 | 0.2922976154777956 | T | T | T |
| 0.5865600110000031 | 0.7527499790000007 | 0.0408900010000011 | F | F | F |
| 0.5891543536663015 | 0.8913309936104351 | 0.2471022706772592 | T | T | T |
| 0.4198899869999977 | 0.2527500090000032 | 0.0408900010000011 | F | F | F |
| 0.4222280208219670 | 0.3849520124662891 | 0.2378855633728661 | T | T | T |
| 0.7532299760000001 | 0.5369399790000031 | 0.0900399980000017 | F | F | F |
| 0.7575071558089170 | 0.6623513738656291 | 0.2877945496967004 | T | T | T |
| 0.9198899869999977 | 0.0369400009999978 | 0.0900399980000017 | F | F | F |
| 0.9197466945903587 | 0.1604742608775485 | 0.2893377559536590 | T | T | T |
| 0.9198899869999977 | 0.7527499790000007 | 0.0408900010000011 | F | F | F |
| 0.9205946127119038 | 0.8908824922432792 | 0.2478138691280787 | T | T | T |
| 0.7532299760000001 | 0.2527500090000032 | 0.0408900010000011 | F | F | F |
| 0.7520428676694998 | 0.3856435603635449 | 0.2452037372173813 | T | T | T |
| 0.0865600030000024 | 0.7164899710000014 | 0.0491500010000010 | F | F | F |
| 0.0859495230159122 | 0.8493329113095742 | 0.2473535737674872 | T | T | T |
| 0.2532300060000026 | 0.2164900000000003 | 0.0491500010000010 | F | F | F |
| 0.2552864098821738 | 0.3481266402803359 | 0.2503319141418144 | T | T | T |
| 0.2593740371446561 | 0.0725732041365662 | 0.2019368035140857 | T | T | T |
| 0.2532300060000026 | 0.9322999720000027 | 0.0000000000000000 | F | F | F |
| 0.0865600030000024 | 0.4323000010000015 | 0.0000000000000000 | F | F | F |
| 0.0867740884095203 | 0.5707223144530720 | 0.2007233113387640 | T | T | T |
| 0.0865600030000024 | 0.0732000020000001 | 0.0817899999999980 | F | F | F |
| 0.0870273652851388 | 0.2114644393284586 | 0.3008132527745174 | T | T | T |

|                    |                    |                    |   |   |   |
|--------------------|--------------------|--------------------|---|---|---|
| 0.2532300060000026 | 0.5731999870000024 | 0.0817899999999980 | F | F | F |
| 0.2499767801361063 | 0.7145005677307369 | 0.3044810190117958 | T | T | T |
| 0.2532300060000026 | 0.8573899869999977 | 0.1309400049999994 | F | F | F |
| 0.2491881095433036 | 0.9973983912308754 | 0.3351614741252490 | T | T | T |
| 0.0865600030000024 | 0.3573899869999977 | 0.1309400049999994 | F | F | F |
| 0.0890311365659728 | 0.4979694009512342 | 0.3341691448014366 | T | T | T |
| 0.4198899869999977 | 0.7164899710000014 | 0.0491500010000010 | F | F | F |
| 0.4205513739326782 | 0.8499132274679001 | 0.2514087986272092 | T | T | T |
| 0.5865600110000031 | 0.2164900000000003 | 0.0491500010000010 | F | F | F |
| 0.5871683359312665 | 0.3397682710341590 | 0.2416901650557657 | T | T | T |
| 0.5820066192401329 | 0.0708195686739546 | 0.2022903054678620 | T | T | T |
| 0.5865600110000031 | 0.9322999720000027 | 0.0000000000000000 | F | F | F |
| 0.4198899869999977 | 0.4323000010000015 | 0.0000000000000000 | F | F | F |
| 0.4174909503853628 | 0.5647947396173515 | 0.2076954346288811 | T | T | T |
| 0.4198899869999977 | 0.0732000020000001 | 0.0817899999999980 | F | F | F |
| 0.4214408910301016 | 0.2166489031375576 | 0.3152383781559115 | T | T | T |
| 0.5865600110000031 | 0.5731999870000024 | 0.0817899999999980 | F | F | F |
| 0.5922320154178204 | 0.7173745432823223 | 0.3054779527219815 | T | T | T |
| 0.5865600110000031 | 0.8573899869999977 | 0.1309400049999994 | F | F | F |
| 0.5926681589230095 | 0.9961338381069846 | 0.3350845817618630 | T | T | T |
| 0.4198899869999977 | 0.3573899869999977 | 0.1309400049999994 | F | F | F |
| 0.7532299760000001 | 0.7164899710000014 | 0.0491500010000010 | F | F | F |
| 0.7551221868440894 | 0.8480037610664428 | 0.2460146309422476 | T | T | T |
| 0.9198899869999977 | 0.2164900000000003 | 0.0491500010000010 | F | F | F |
| 0.9191452029003859 | 0.3517342821474790 | 0.2512086124344282 | T | T | T |

|                    |                    |                    |   |   |   |
|--------------------|--------------------|--------------------|---|---|---|
| 0.9191758197174489 | 0.0723067311116080 | 0.2008853042317892 | T | T | T |
| 0.9198899869999977 | 0.9322999720000027 | 0.0000000000000000 | F | F | F |
| 0.7532299760000001 | 0.4323000010000015 | 0.0000000000000000 | F | F | F |
| 0.7578533505958494 | 0.5700529293437570 | 0.2009010551930902 | T | T | T |
| 0.7532299760000001 | 0.0732000020000001 | 0.0817899999999980 | F | F | F |
| 0.7530259997614980 | 0.2130067399256211 | 0.3028389921569057 | T | T | T |
| 0.9198899869999977 | 0.5731999870000024 | 0.0817899999999980 | F | F | F |
| 0.9201374624592144 | 0.7120568820752162 | 0.3038540101880665 | T | T | T |
| 0.9198899869999977 | 0.8573899869999977 | 0.1309400049999994 | F | F | F |
| 0.9198651859926654 | 0.9988541082811777 | 0.3341852881085480 | T | T | T |
| 0.7532299760000001 | 0.3573899869999977 | 0.1309400049999994 | F | F | F |
| 0.7343889494322902 | 0.4966267677385728 | 0.3351999130047881 | T | T | T |
| 0.5716939607015326 | 0.5493954413737753 | 0.3626648290581411 | T | T | T |
| 0.3864155801352717 | 0.5880510140325119 | 0.4109766097898553 | T | T | T |
| 0.4274808868751231 | 0.3851205881859960 | 0.3662764691228416 | T | T | T |

**Ni<sub>3,D</sub>:**

1.0000000000000000

|                     |                     |                     |
|---------------------|---------------------|---------------------|
| 11.3280000686999998 | 0.0000000000000000  | 0.0000000000000000  |
| 0.0000000000000000  | 10.2098999023000001 | 0.0000000000000000  |
| 0.0000000000000000  | 0.0000000000000000  | 17.8448009491000015 |

Ti O Ni

24 47 3

Direct

|                    |                    |                    |   |   |   |
|--------------------|--------------------|--------------------|---|---|---|
| 0.0865600030000024 | 0.5369399790000031 | 0.0900399980000017 | F | F | F |
| 0.0841986985106777 | 0.6659027288190174 | 0.2874217086977813 | T | T | T |
| 0.2532300060000026 | 0.0369400009999978 | 0.0900399980000017 | F | F | F |
| 0.2519476340397648 | 0.1585367276559324 | 0.2904505519160803 | T | T | T |
| 0.2532300060000026 | 0.7527499790000007 | 0.0408900010000011 | F | F | F |
| 0.2530222772223319 | 0.8909967068433760 | 0.2475829162109165 | T | T | T |
| 0.0865600030000024 | 0.2527500090000032 | 0.0408900010000011 | F | F | F |
| 0.0857074952872876 | 0.3877069185220836 | 0.2488363640445045 | T | T | T |
| 0.4198899869999977 | 0.5369399790000031 | 0.0900399980000017 | F | F | F |
| 0.4199071542543699 | 0.6667194172182243 | 0.2894734118936145 | T | T | T |
| 0.5865600110000031 | 0.0369400009999978 | 0.0900399980000017 | F | F | F |
| 0.5876168696642521 | 0.1585045870586735 | 0.2904314568298368 | T | T | T |
| 0.5865600110000031 | 0.7527499790000007 | 0.0408900010000011 | F | F | F |
| 0.5867880337304701 | 0.8909355848013778 | 0.2475697366404738 | T | T | T |
| 0.4198899869999977 | 0.2527500090000032 | 0.0408900010000011 | F | F | F |
| 0.4197668662299502 | 0.3798643154427111 | 0.2434738356648876 | T | T | T |
| 0.7532299760000001 | 0.5369399790000031 | 0.0900399980000017 | F | F | F |
| 0.7557166148434368 | 0.6659451630888596 | 0.2873473753844332 | T | T | T |
| 0.9198899869999977 | 0.0369400009999978 | 0.0900399980000017 | F | F | F |
| 0.9197490834250180 | 0.1600681415894555 | 0.2892002763518965 | T | T | T |
| 0.9198899869999977 | 0.7527499790000007 | 0.0408900010000011 | F | F | F |
| 0.9198955881613312 | 0.8903320807230209 | 0.2482567284340222 | T | T | T |
| 0.7532299760000001 | 0.2527500090000032 | 0.0408900010000011 | F | F | F |
| 0.7538072293333623 | 0.3877164776750973 | 0.2487932295638582 | T | T | T |
| 0.0865600030000024 | 0.7164899710000014 | 0.0491500010000010 | F | F | F |

|                    |                     |                    |   |   |   |
|--------------------|---------------------|--------------------|---|---|---|
| 0.0863561212834492 | 0.8496578897619366  | 0.2459485105159171 | T | T | T |
| 0.2532300060000026 | 0.2164900000000003  | 0.0491500010000010 | F | F | F |
| 0.2529297962747314 | 0.3443514608460446  | 0.2478700250017999 | T | T | T |
| 0.2540458883315942 | 0.0703089121676274  | 0.2013779736958610 | T | T | T |
| 0.2532300060000026 | 0.9322999720000027  | 0.0000000000000000 | F | F | F |
| 0.0865600030000024 | 0.4323000010000015  | 0.0000000000000000 | F | F | F |
| 0.0886947711856660 | 0.5699171694161232  | 0.2012067750889057 | T | T | T |
| 0.0865600030000024 | 0.0732000020000001  | 0.0817899999999980 | F | F | F |
| 0.0861987525184996 | 0.2112559938911044  | 0.3028835986747263 | T | T | T |
| 0.2532300060000026 | 0.5731999870000024  | 0.0817899999999980 | F | F | F |
| 0.2542145206654843 | 0.7200513444236646  | 0.3089139403679976 | T | T | T |
| 0.2532300060000026 | 0.8573899869999977  | 0.1309400049999994 | F | F | F |
| 0.2527524469580421 | -0.0031265818193474 | 0.3348874857278202 | T | T | T |
| 0.0865600030000024 | 0.3573899869999977  | 0.1309400049999994 | F | F | F |
| 0.0809352325239703 | 0.4934853219486711  | 0.3374610381648974 | T | T | T |
| 0.4198899869999977 | 0.7164899710000014  | 0.0491500010000010 | F | F | F |
| 0.4198798680139412 | 0.8478534717535058  | 0.2458200652889559 | T | T | T |
| 0.5865600110000031 | 0.2164900000000003  | 0.0491500010000010 | F | F | F |
| 0.5866186947837227 | 0.3443296591331198  | 0.2478654062664712 | T | T | T |
| 0.5856581556414667 | 0.0702774099669306  | 0.2013773713473817 | T | T | T |
| 0.5865600110000031 | 0.9322999720000027  | 0.0000000000000000 | F | F | F |
| 0.4198899869999977 | 0.4323000010000015  | 0.0000000000000000 | F | F | F |
| 0.4197680904393719 | 0.5665912835521054  | 0.2048378335871448 | T | T | T |
| 0.4198899869999977 | 0.0732000020000001  | 0.0817899999999980 | F | F | F |
| 0.4198124336511836 | 0.2110122969565437  | 0.3049396521180719 | T | T | T |

|                    |                     |                    |   |   |   |
|--------------------|---------------------|--------------------|---|---|---|
| 0.5865600110000031 | 0.5731999870000024  | 0.0817899999999980 | F | F | F |
| 0.5856462640284510 | 0.7200855987069271  | 0.3088639080777709 | T | T | T |
| 0.5865600110000031 | 0.8573899869999977  | 0.1309400049999994 | F | F | F |
| 0.5869026057775667 | -0.0031418725761528 | 0.3348818484383895 | T | T | T |
| 0.4198899869999977 | 0.3573899869999977  | 0.1309400049999994 | F | F | F |
| 0.7532299760000001 | 0.7164899710000014  | 0.0491500010000010 | F | F | F |
| 0.7534446248459667 | 0.8497068373122650  | 0.2458891922189118 | T | T | T |
| 0.9198899869999977 | 0.2164900000000003  | 0.0491500010000010 | F | F | F |
| 0.9198244173692541 | 0.3483833609762513  | 0.2485999769213441 | T | T | T |
| 0.9198514249121533 | 0.0719764453695831  | 0.2007296043202920 | T | T | T |
| 0.9198899869999977 | 0.9322999720000027  | 0.0000000000000000 | F | F | F |
| 0.7532299760000001 | 0.4323000010000015  | 0.0000000000000000 | F | F | F |
| 0.7510398265865003 | 0.5699399273689444  | 0.2011377139488847 | T | T | T |
| 0.7532299760000001 | 0.0732000020000001  | 0.0817899999999980 | F | F | F |
| 0.7533438342700244 | 0.2112820373668705  | 0.3028743279875163 | T | T | T |
| 0.9198899869999977 | 0.5731999870000024  | 0.0817899999999980 | F | F | F |
| 0.9198767025599952 | 0.7158071082946366  | 0.3038110349269507 | T | T | T |
| 0.9198899869999977 | 0.8573899869999977  | 0.1309400049999994 | F | F | F |
| 0.9197836327487371 | -0.0021214419088638 | 0.3340890236586691 | T | T | T |
| 0.7532299760000001 | 0.3573899869999977  | 0.1309400049999994 | F | F | F |
| 0.7589659267596208 | 0.4934651213551144  | 0.3373424778722111 | T | T | T |
| 0.2360289882324620 | 0.5543695799525412  | 0.3548265506946391 | T | T | T |
| 0.4199607785721741 | 0.4548642977087249  | 0.3670564805290932 | T | T | T |
| 0.6038397498233412 | 0.5540806631803270  | 0.3545359168406692 | T | T | T |

**Ni<sub>4,a</sub>:**

1.0000000000000000

|                     |                     |                     |
|---------------------|---------------------|---------------------|
| 11.3280000686999998 | 0.0000000000000000  | 0.0000000000000000  |
| 0.0000000000000000  | 10.2098999023000001 | 0.0000000000000000  |
| 0.0000000000000000  | 0.0000000000000000  | 17.8448009491000015 |

Ti O Ni

24 48 4

Direct

|                    |                    |                    |   |   |   |
|--------------------|--------------------|--------------------|---|---|---|
| 0.0865600030000024 | 0.5369399790000031 | 0.0900399980000017 | F | F | F |
| 0.0866743624036688 | 0.6591652344980203 | 0.2880702923300071 | T | T | T |
| 0.2532300060000026 | 0.0369400009999978 | 0.0900399980000017 | F | F | F |
| 0.2540734125484762 | 0.1606976581537975 | 0.2891482316795898 | T | T | T |
| 0.2532300060000026 | 0.7527499790000007 | 0.0408900010000011 | F | F | F |
| 0.2507170175715717 | 0.8916224137905155 | 0.2489631329249353 | T | T | T |
| 0.0865600030000024 | 0.2527500090000032 | 0.0408900010000011 | F | F | F |
| 0.0867514634728235 | 0.3870323580494986 | 0.2491824818924280 | T | T | T |
| 0.4198899869999977 | 0.5369399790000031 | 0.0900399980000017 | F | F | F |
| 0.4138438794881581 | 0.6666580129532832 | 0.2882678804070065 | T | T | T |
| 0.5865600110000031 | 0.0369400009999978 | 0.0900399980000017 | F | F | F |
| 0.5867061853617327 | 0.1532212686508266 | 0.2922792218160532 | T | T | T |
| 0.5865600110000031 | 0.7527499790000007 | 0.0408900010000011 | F | F | F |
| 0.5865616104528009 | 0.8881248661111225 | 0.2419943666809207 | T | T | T |
| 0.4198899869999977 | 0.2527500090000032 | 0.0408900010000011 | F | F | F |
| 0.4208472027170523 | 0.3890557986910853 | 0.2497469310744198 | T | T | T |

|                    |                    |                    |   |   |   |
|--------------------|--------------------|--------------------|---|---|---|
| 0.7532299760000001 | 0.5369399790000031 | 0.0900399980000017 | F | F | F |
| 0.7594041461027039 | 0.6666792894592349 | 0.2882695188858102 | T | T | T |
| 0.9198899869999977 | 0.0369400009999978 | 0.0900399980000017 | F | F | F |
| 0.9194361089442371 | 0.1608202584909636 | 0.2890535999859716 | T | T | T |
| 0.9198899869999977 | 0.7527499790000007 | 0.0408900010000011 | F | F | F |
| 0.9225277496029857 | 0.8915788506216890 | 0.2490651201917542 | T | T | T |
| 0.7532299760000001 | 0.2527500090000032 | 0.0408900010000011 | F | F | F |
| 0.7525967620641584 | 0.3890848869746541 | 0.2498672498049211 | T | T | T |
| 0.0865600030000024 | 0.7164899710000014 | 0.0491500010000010 | F | F | F |
| 0.0866490172170676 | 0.8478426302407057 | 0.2455711648264082 | T | T | T |
| 0.2532300060000026 | 0.2164900000000003 | 0.0491500010000010 | F | F | F |
| 0.2539101012560979 | 0.3476401064038042 | 0.2496253823902644 | T | T | T |
| 0.2539343883890369 | 0.0714653948570659 | 0.2008150453885063 | T | T | T |
| 0.2532300060000026 | 0.9322999720000027 | 0.0000000000000000 | F | F | F |
| 0.0865600030000024 | 0.4323000010000015 | 0.0000000000000000 | F | F | F |
| 0.0867387977232650 | 0.5698687573038321 | 0.2003703585093823 | T | T | T |
| 0.0865600030000024 | 0.0732000020000001 | 0.0817899999999980 | F | F | F |
| 0.0867160383061455 | 0.2126318427089243 | 0.3021329188454401 | T | T | T |
| 0.2532300060000026 | 0.5731999870000024 | 0.0817899999999980 | F | F | F |
| 0.2499377479509702 | 0.7141981777551233 | 0.3033430179590359 | T | T | T |
| 0.2532300060000026 | 0.8573899869999977 | 0.1309400049999994 | F | F | F |
| 0.2489465298420327 | 0.9985417935905618 | 0.3345587262585014 | T | T | T |
| 0.0865600030000024 | 0.3573899869999977 | 0.1309400049999994 | F | F | F |
| 0.0866113055423470 | 0.4975120520089244 | 0.3339126852117071 | T | T | T |
| 0.4198899869999977 | 0.7164899710000014 | 0.0491500010000010 | F | F | F |



|                    |                    |                    |   |   |   |
|--------------------|--------------------|--------------------|---|---|---|
| 0.4165142040447249 | 0.8510624138304810 | 0.2482835954476781 | T | T | T |
| 0.5865600110000031 | 0.2164900000000003 | 0.0491500010000010 | F | F | F |
| 0.5866956458121666 | 0.3440936041664501 | 0.2527838385518415 | T | T | T |
| 0.5864868427633609 | 0.0724158404152299 | 0.2013210812363039 | T | T | T |
| 0.5865600110000031 | 0.9322999720000027 | 0.0000000000000000 | F | F | F |
| 0.4198899869999977 | 0.4323000010000015 | 0.0000000000000000 | F | F | F |
| 0.4138149497305426 | 0.5643325132043712 | 0.2018826293806130 | T | T | T |
| 0.4198899869999977 | 0.0732000020000001 | 0.0817899999999980 | F | F | F |
| 0.4202332879150670 | 0.2076960578505458 | 0.3039066771962814 | T | T | T |
| 0.5865600110000031 | 0.5731999870000024 | 0.0817899999999980 | F | F | F |
| 0.5866022538166911 | 0.7043188845459958 | 0.2783817959484077 | T | T | T |
| 0.5865600110000031 | 0.8573899869999977 | 0.1309400049999994 | F | F | F |
| 0.5865370795252931 | 0.9866288412744750 | 0.3389038454311318 | T | T | T |
| 0.4198899869999977 | 0.3573899869999977 | 0.1309400049999994 | F | F | F |
| 0.4181002323940240 | 0.4939472736424148 | 0.3384311068243233 | T | T | T |
| 0.7532299760000001 | 0.7164899710000014 | 0.0491500010000010 | F | F | F |
| 0.7568063801493198 | 0.8512065621354953 | 0.2484181236592028 | T | T | T |
| 0.9198899869999977 | 0.2164900000000003 | 0.0491500010000010 | F | F | F |
| 0.9195348922452589 | 0.3478719610787778 | 0.2496964882157187 | T | T | T |
| 0.9197543893490653 | 0.0714695356187652 | 0.2007637956542556 | T | T | T |
| 0.9198899869999977 | 0.9322999720000027 | 0.0000000000000000 | F | F | F |
| 0.7532299760000001 | 0.4323000010000015 | 0.0000000000000000 | F | F | F |
| 0.7594771358281055 | 0.5643765499031013 | 0.2019025534431566 | T | T | T |
| 0.7532299760000001 | 0.0732000020000001 | 0.0817899999999980 | F | F | F |
| 0.7531821113219667 | 0.2077033922667177 | 0.3037874653474378 | T | T | T |

|                    |                    |                    |   |   |   |
|--------------------|--------------------|--------------------|---|---|---|
| 0.9198899869999977 | 0.5731999870000024 | 0.0817899999999980 | F | F | F |
| 0.9233446404368119 | 0.7142118372187598 | 0.3033259752554769 | T | T | T |
| 0.9198899869999977 | 0.8573899869999977 | 0.1309400049999994 | F | F | F |
| 0.9242369266501684 | 0.9986731572347028 | 0.3345722150893479 | T | T | T |
| 0.7532299760000001 | 0.3573899869999977 | 0.1309400049999994 | F | F | F |
| 0.7554937270985629 | 0.4942314906975435 | 0.3385066943512904 | T | T | T |
| 0.6872797775776726 | 0.5963645531759223 | 0.4130260393548894 | T | T | T |
| 0.4854382968246767 | 0.5962708773961484 | 0.4130909453868610 | T | T | T |
| 0.5860324974152227 | 0.7268249896592407 | 0.4958895969517914 | T | T | T |
| 0.5863126605432845 | 0.8019714476529546 | 0.3745129812550512 | T | T | T |

**Ni<sub>4,b</sub>:**

1.00000000000000

|                     |                     |                     |
|---------------------|---------------------|---------------------|
| 11.3280000686999998 | 0.0000000000000000  | 0.0000000000000000  |
| 0.0000000000000000  | 10.2098999023000001 | 0.0000000000000000  |
| 0.0000000000000000  | 0.0000000000000000  | 17.8448009491000015 |

Ti O Ni

24 48 4

Direct

|                    |                    |                    |   |   |   |
|--------------------|--------------------|--------------------|---|---|---|
| 0.0865600030000024 | 0.5369399790000031 | 0.0900399980000017 | F | F | F |
| 0.0851338324138526 | 0.6604178228199783 | 0.2870730265282795 | T | T | T |
| 0.2532300060000026 | 0.0369400009999978 | 0.0900399980000017 | F | F | F |
| 0.2547414206099756 | 0.1606976164369762 | 0.2904061112461623 | T | T | T |
| 0.2532300060000026 | 0.7527499790000007 | 0.0408900010000011 | F | F | F |

|                    |                    |                    |   |   |   |
|--------------------|--------------------|--------------------|---|---|---|
| 0.2474938023207247 | 0.8897825941987079 | 0.2429862227891204 | T | T | T |
| 0.0865600030000024 | 0.2527500090000032 | 0.0408900010000011 | F | F | F |
| 0.0883315969625212 | 0.3887685276692171 | 0.2496112032874965 | T | T | T |
| 0.4198899869999977 | 0.5369399790000031 | 0.0900399980000017 | F | F | F |
| 0.4235670969332768 | 0.6696708231061449 | 0.2834788852702153 | T | T | T |
| 0.5865600110000031 | 0.036940009999978  | 0.0900399980000017 | F | F | F |
| 0.5882446262083328 | 0.1627531202709277 | 0.2897314487911241 | T | T | T |
| 0.5865600110000031 | 0.7527499790000007 | 0.0408900010000011 | F | F | F |
| 0.5905513050964037 | 0.8913404702516982 | 0.2439322221245746 | T | T | T |
| 0.4198899869999977 | 0.2527500090000032 | 0.0408900010000011 | F | F | F |
| 0.4201894497738438 | 0.3936152052201085 | 0.2522225002058137 | T | T | T |
| 0.7532299760000001 | 0.5369399790000031 | 0.0900399980000017 | F | F | F |
| 0.7532270227724988 | 0.6719575321096026 | 0.2833107361832082 | T | T | T |
| 0.9198899869999977 | 0.036940009999978  | 0.0900399980000017 | F | F | F |
| 0.9205829729869436 | 0.1643355741594845 | 0.2892382799828326 | T | T | T |
| 0.9198899869999977 | 0.7527499790000007 | 0.0408900010000011 | F | F | F |
| 0.9217770578671776 | 0.8955606912938853 | 0.2504710880642526 | T | T | T |
| 0.7532299760000001 | 0.2527500090000032 | 0.0408900010000011 | F | F | F |
| 0.7539418445857355 | 0.3939674073444820 | 0.2517417043289683 | T | T | T |
| 0.0865600030000024 | 0.7164899710000014 | 0.0491500010000010 | F | F | F |
| 0.0861946553847440 | 0.8568479096302954 | 0.2492097780358276 | T | T | T |
| 0.2532300060000026 | 0.2164900000000003 | 0.0491500010000010 | F | F | F |
| 0.2540751412269164 | 0.3457120758184103 | 0.2514117464906198 | T | T | T |
| 0.2491086999744014 | 0.0726001518239468 | 0.2013485063444055 | T | T | T |
| 0.2532300060000026 | 0.9322999720000027 | 0.0000000000000000 | F | F | F |

|                    |                     |                    |   |   |   |
|--------------------|---------------------|--------------------|---|---|---|
| 0.0865600030000024 | 0.4323000010000015  | 0.0000000000000000 | F | F | F |
| 0.0838678074915792 | 0.5696991521469139  | 0.2001051758470781 | T | T | T |
| 0.0865600030000024 | 0.0732000020000001  | 0.0817899999999980 | F | F | F |
| 0.0883745838913953 | 0.2123049754614878  | 0.3039896847628442 | T | T | T |
| 0.2532300060000026 | 0.5731999870000024  | 0.0817899999999980 | F | F | F |
| 0.2501020683132220 | 0.7133067975301726  | 0.2917261721017161 | T | T | T |
| 0.2532300060000026 | 0.8573899869999977  | 0.1309400049999994 | F | F | F |
| 0.2637538198948704 | -0.0028826710500128 | 0.3387067814422083 | T | T | T |
| 0.0865600030000024 | 0.3573899869999977  | 0.1309400049999994 | F | F | F |
| 0.0899664766267429 | 0.5011111853229318  | 0.3341962227403093 | T | T | T |
| 0.4198899869999977 | 0.7164899710000014  | 0.0491500010000010 | F | F | F |
| 0.4190490189973116 | 0.8644778409202928  | 0.2555063054066590 | T | T | T |
| 0.5865600110000031 | 0.2164900000000003  | 0.0491500010000010 | F | F | F |
| 0.5875414068552507 | 0.3510369305802232  | 0.2526045507481082 | T | T | T |
| 0.5867142801847028 | 0.0733149337073106  | 0.2010783698783359 | T | T | T |
| 0.5865600110000031 | 0.9322999720000027  | 0.0000000000000000 | F | F | F |
| 0.4198899869999977 | 0.4323000010000015  | 0.0000000000000000 | F | F | F |
| 0.4056793610035848 | 0.5604312611431165  | 0.1997234195380922 | T | T | T |
| 0.4198899869999977 | 0.0732000020000001  | 0.0817899999999980 | F | F | F |
| 0.4214333298833686 | 0.2102084267883751  | 0.3041989716390289 | T | T | T |
| 0.5865600110000031 | 0.5731999870000024  | 0.0817899999999980 | F | F | F |
| 0.5875732275358339 | 0.6996422235341088  | 0.2557081430555239 | T | T | T |
| 0.5865600110000031 | 0.8573899869999977  | 0.1309400049999994 | F | F | F |
| 0.5963998343964093 | 0.0014714480678086  | 0.3403293408644760 | T | T | T |
| 0.4198899869999977 | 0.3573899869999977  | 0.1309400049999994 | F | F | F |

|                    |                    |                    |   |   |   |
|--------------------|--------------------|--------------------|---|---|---|
| 0.4195657464713325 | 0.5025287332822328 | 0.3380752433074372 | T | T | T |
| 0.7532299760000001 | 0.7164899710000014 | 0.0491500010000010 | F | F | F |
| 0.7562008796921742 | 0.8594948063197730 | 0.2500691388861992 | T | T | T |
| 0.9198899869999977 | 0.2164900000000003 | 0.0491500010000010 | F | F | F |
| 0.9221477605288930 | 0.3512895578237133 | 0.2521403251302566 | T | T | T |
| 0.9211814476819149 | 0.0744661466736596 | 0.2010817785125854 | T | T | T |
| 0.9198899869999977 | 0.9322999720000027 | 0.0000000000000000 | F | F | F |
| 0.7532299760000001 | 0.4323000010000015 | 0.0000000000000000 | F | F | F |
| 0.7703261482343252 | 0.5631830264762120 | 0.2007266366582396 | T | T | T |
| 0.7532299760000001 | 0.0732000020000001 | 0.0817899999999980 | F | F | F |
| 0.7550535784928228 | 0.2141822084642666 | 0.3033602311810952 | T | T | T |
| 0.9198899869999977 | 0.5731999870000024 | 0.0817899999999980 | F | F | F |
| 0.9214873483867854 | 0.7177011472318807 | 0.2999062525875273 | T | T | T |
| 0.9198899869999977 | 0.8573899869999977 | 0.1309400049999994 | F | F | F |
| 0.9216457178814705 | 0.0023882758691207 | 0.3356969027039707 | T | T | T |
| 0.7532299760000001 | 0.3573899869999977 | 0.1309400049999994 | F | F | F |
| 0.7496498521539798 | 0.5038818656578073 | 0.3387449519952688 | T | T | T |
| 0.3872280622966263 | 0.8747948117880111 | 0.3689938384789180 | T | T | T |
| 0.4715377631418393 | 0.6482696320793648 | 0.4061166496193291 | T | T | T |
| 0.6695927033541141 | 0.6232464364275582 | 0.4014483809068284 | T | T | T |
| 0.5855820082083767 | 0.8416492793656949 | 0.3926372162261049 | T | T | T |

**Ni<sub>4,c</sub>:**

1.00000000000000

|                     |                     |                     |
|---------------------|---------------------|---------------------|
| 11.3280000686999998 | 0.0000000000000000  | 0.0000000000000000  |
| 0.0000000000000000  | 10.2098999023000001 | 0.0000000000000000  |
| 0.0000000000000000  | 0.0000000000000000  | 17.8448009491000015 |

Ti O Ni

24 48 4

Direct

|                    |                    |                    |   |   |   |
|--------------------|--------------------|--------------------|---|---|---|
| 0.0865600030000024 | 0.5369399790000031 | 0.0900399980000017 | F | F | F |
| 0.0861806605135813 | 0.6579320064631550 | 0.2888821556612240 | T | T | T |
| 0.2532300060000026 | 0.0369400009999978 | 0.0900399980000017 | F | F | F |
| 0.2497414339036048 | 0.1564885558957924 | 0.2894096325688876 | T | T | T |
| 0.2532300060000026 | 0.7527499790000007 | 0.0408900010000011 | F | F | F |
| 0.2523490063011710 | 0.8862416412786983 | 0.2479079410135234 | T | T | T |
| 0.0865600030000024 | 0.2527500090000032 | 0.0408900010000011 | F | F | F |
| 0.0864297878036963 | 0.3877017174634599 | 0.2477155457030906 | T | T | T |
| 0.4198899869999977 | 0.5369399790000031 | 0.0900399980000017 | F | F | F |
| 0.4177870482459661 | 0.6608993780571260 | 0.2893111746973230 | T | T | T |
| 0.5865600110000031 | 0.0369400009999978 | 0.0900399980000017 | F | F | F |
| 0.5865641343431492 | 0.1571408251689624 | 0.3012064064799216 | T | T | T |
| 0.5865600110000031 | 0.7527499790000007 | 0.0408900010000011 | F | F | F |
| 0.5861634118292309 | 0.8956627893690758 | 0.2454729292405249 | T | T | T |
| 0.4198899869999977 | 0.2527500090000032 | 0.0408900010000011 | F | F | F |
| 0.4200189758641170 | 0.3846247481383905 | 0.2432114723933592 | T | T | T |
| 0.7532299760000001 | 0.5369399790000031 | 0.0900399980000017 | F | F | F |
| 0.7547152545950140 | 0.6608602640166642 | 0.2892980277086781 | T | T | T |
| 0.9198899869999977 | 0.0369400009999978 | 0.0900399980000017 | F | F | F |

|                    |                    |                    |   |   |   |
|--------------------|--------------------|--------------------|---|---|---|
| 0.9230932025796790 | 0.1566703647446464 | 0.2893584114103200 | T | T | T |
| 0.9198899869999977 | 0.7527499790000007 | 0.0408900010000011 | F | F | F |
| 0.9200401377026628 | 0.8863142141507925 | 0.2480162736051705 | T | T | T |
| 0.7532299760000001 | 0.2527500090000032 | 0.0408900010000011 | F | F | F |
| 0.7527699313629908 | 0.3846967126558770 | 0.2431872526188543 | T | T | T |
| 0.0865600030000024 | 0.7164899710000014 | 0.0491500010000010 | F | F | F |
| 0.0861890288146948 | 0.8468603669470169 | 0.2474991752529238 | T | T | T |
| 0.2532300060000026 | 0.2164900000000003 | 0.0491500010000010 | F | F | F |
| 0.2538926847447043 | 0.3469352291363927 | 0.2488066379115036 | T | T | T |
| 0.2545876132915132 | 0.0695635984375255 | 0.2008462687181806 | T | T | T |
| 0.2532300060000026 | 0.9322999720000027 | 0.0000000000000000 | F | F | F |
| 0.0865600030000024 | 0.4323000010000015 | 0.0000000000000000 | F | F | F |
| 0.0859751030242792 | 0.5695010930374826 | 0.2006848707297042 | T | T | T |
| 0.0865600030000024 | 0.0732000020000001 | 0.0817899999999980 | F | F | F |
| 0.0863903675515238 | 0.2112513964352068 | 0.3027609649660696 | T | T | T |
| 0.2532300060000026 | 0.5731999870000024 | 0.0817899999999980 | F | F | F |
| 0.2519811217896230 | 0.7105210536143574 | 0.3016021617823594 | T | T | T |
| 0.2532300060000026 | 0.8573899869999977 | 0.1309400049999994 | F | F | F |
| 0.2503099073562801 | 0.9939454677956879 | 0.3338836545622850 | T | T | T |
| 0.0865600030000024 | 0.3573899869999977 | 0.1309400049999994 | F | F | F |
| 0.0864467439216799 | 0.4959912010255651 | 0.3338240759244406 | T | T | T |
| 0.4198899869999977 | 0.7164899710000014 | 0.0491500010000010 | F | F | F |
| 0.4209345148669083 | 0.8440714354191179 | 0.2494455060561686 | T | T | T |
| 0.5865600110000031 | 0.2164900000000003 | 0.0491500010000010 | F | F | F |
| 0.5864580074638471 | 0.3392124136287237 | 0.2409440213186216 | T | T | T |

|                    |                    |                    |   |   |   |
|--------------------|--------------------|--------------------|---|---|---|
| 0.5864331623529349 | 0.0681632497558661 | 0.2038401025253604 | T | T | T |
| 0.5865600110000031 | 0.9322999720000027 | 0.0000000000000000 | F | F | F |
| 0.4198899869999977 | 0.4323000010000015 | 0.0000000000000000 | F | F | F |
| 0.4220809656294613 | 0.5678854679116732 | 0.2020030789312051 | T | T | T |
| 0.4198899869999977 | 0.0732000020000001 | 0.0817899999999980 | F | F | F |
| 0.4154504732612935 | 0.2083187639837766 | 0.3073457803419447 | T | T | T |
| 0.5865600110000031 | 0.5731999870000024 | 0.0817899999999980 | F | F | F |
| 0.5862535235296263 | 0.7029709229814380 | 0.3091029582141717 | T | T | T |
| 0.5865600110000031 | 0.8573899869999977 | 0.1309400049999994 | F | F | F |
| 0.5863270062321183 | 0.9892893874508550 | 0.3367730122716414 | T | T | T |
| 0.4198899869999977 | 0.3573899869999977 | 0.1309400049999994 | F | F | F |
| 0.4135654731044999 | 0.4963080586902029 | 0.3405515986497667 | T | T | T |
| 0.7532299760000001 | 0.7164899710000014 | 0.0491500010000010 | F | F | F |
| 0.7515485388499078 | 0.8439836705216194 | 0.2494790648780795 | T | T | T |
| 0.9198899869999977 | 0.2164900000000003 | 0.0491500010000010 | F | F | F |
| 0.9189713105360173 | 0.3471701841007681 | 0.2488595959881945 | T | T | T |
| 0.9183854852353951 | 0.0696748864794823 | 0.2008209048028993 | T | T | T |
| 0.9198899869999977 | 0.9322999720000027 | 0.0000000000000000 | F | F | F |
| 0.7532299760000001 | 0.4323000010000015 | 0.0000000000000000 | F | F | F |
| 0.7508239500264741 | 0.5678752051186526 | 0.2019868101837261 | T | T | T |
| 0.7532299760000001 | 0.0732000020000001 | 0.0817899999999980 | F | F | F |
| 0.7574613114581153 | 0.2088349113604144 | 0.3076146861974735 | T | T | T |
| 0.9198899869999977 | 0.5731999870000024 | 0.0817899999999980 | F | F | F |
| 0.9204230348173253 | 0.7105494921836535 | 0.3017036325464560 | T | T | T |
| 0.9198899869999977 | 0.8573899869999977 | 0.1309400049999994 | F | F | F |



|                    |                    |                    |   |   |   |
|--------------------|--------------------|--------------------|---|---|---|
| 0.9220340787332449 | 0.9941520792723432 | 0.3338843656071858 | T | T | T |
| 0.7532299760000001 | 0.3573899869999977 | 0.1309400049999994 | F | F | F |
| 0.7583437515648964 | 0.4965082852856853 | 0.3406383055763920 | T | T | T |
| 0.6917107202593912 | 0.3248180852885511 | 0.3835158926281002 | T | T | T |
| 0.4807432300833808 | 0.3234525184107144 | 0.3833188311927504 | T | T | T |
| 0.5853366217529293 | 0.4109483252572656 | 0.4795540298880728 | T | T | T |
| 0.5853425907554576 | 0.5343513224498276 | 0.3650410043053869 | T | T | T |

**Ni<sub>5,a</sub>:**

1.00000000000000

|                     |                     |                     |
|---------------------|---------------------|---------------------|
| 11.3280000686999998 | 0.0000000000000000  | 0.0000000000000000  |
| 0.0000000000000000  | 10.2098999023000001 | 0.0000000000000000  |
| 0.0000000000000000  | 0.0000000000000000  | 17.8448009491000015 |

Ti O Ni

24 48 5

Direct

|                    |                    |                    |   |   |   |
|--------------------|--------------------|--------------------|---|---|---|
| 0.0865600030000024 | 0.5369399790000031 | 0.0900399980000017 | F | F | F |
| 0.0894572687141093 | 0.6604274829826342 | 0.2900965744110958 | T | T | T |
| 0.2532300060000026 | 0.0369400009999978 | 0.0900399980000017 | F | F | F |
| 0.2534264880124779 | 0.1598056468115263 | 0.2903599372153707 | T | T | T |
| 0.2532300060000026 | 0.7527499790000007 | 0.0408900010000011 | F | F | F |
| 0.2542411903118288 | 0.8919602027236988 | 0.2475216903736659 | T | T | T |
| 0.0865600030000024 | 0.2527500090000032 | 0.0408900010000011 | F | F | F |
| 0.0866310130177873 | 0.3881656960782008 | 0.2500443024732035 | T | T | T |

|                    |                    |                    |   |   |   |
|--------------------|--------------------|--------------------|---|---|---|
| 0.4198899869999977 | 0.5369399790000031 | 0.0900399980000017 | F | F | F |
| 0.4194485246165099 | 0.6625197837623998 | 0.2908575384691797 | T | T | T |
| 0.5865600110000031 | 0.0369400009999978 | 0.0900399980000017 | F | F | F |
| 0.5860189285673327 | 0.1548304181420920 | 0.2912671124744460 | T | T | T |
| 0.5865600110000031 | 0.7527499790000007 | 0.0408900010000011 | F | F | F |
| 0.5860948202446783 | 0.8887433311872875 | 0.2406584300079171 | T | T | T |
| 0.4198899869999977 | 0.2527500090000032 | 0.0408900010000011 | F | F | F |
| 0.4186015457793338 | 0.3870268228397898 | 0.2452126619322887 | T | T | T |
| 0.7532299760000001 | 0.5369399790000031 | 0.0900399980000017 | F | F | F |
| 0.7610953612535875 | 0.6681657853062803 | 0.2882973843556408 | T | T | T |
| 0.9198899869999977 | 0.0369400009999978 | 0.0900399980000017 | F | F | F |
| 0.9193447456716768 | 0.1613478637319076 | 0.2893998680418380 | T | T | T |
| 0.9198899869999977 | 0.7527499790000007 | 0.0408900010000011 | F | F | F |
| 0.9247491445611156 | 0.8917874741702230 | 0.2487864193859088 | T | T | T |
| 0.7532299760000001 | 0.2527500090000032 | 0.0408900010000011 | F | F | F |
| 0.7505904304592153 | 0.3912095159500779 | 0.2529012404466292 | T | T | T |
| 0.0865600030000024 | 0.7164899710000014 | 0.0491500010000010 | F | F | F |
| 0.0897708361765058 | 0.8464924130391092 | 0.2458474579359148 | T | T | T |
| 0.2532300060000026 | 0.2164900000000003 | 0.0491500010000010 | F | F | F |
| 0.2517744013364093 | 0.3437376717985471 | 0.2483531566069208 | T | T | T |
| 0.2510461542951815 | 0.0702816783943198 | 0.2017983041073079 | T | T | T |
| 0.2532300060000026 | 0.9322999720000027 | 0.0000000000000000 | F | F | F |
| 0.0865600030000024 | 0.4323000010000015 | 0.0000000000000000 | F | F | F |
| 0.0913191273867934 | 0.5708650194162250 | 0.2017643859502201 | T | T | T |
| 0.0865600030000024 | 0.0732000020000001 | 0.0817899999999980 | F | F | F |

|                    |                     |                    |   |   |   |
|--------------------|---------------------|--------------------|---|---|---|
| 0.0862652023928702 | 0.2119816989551269  | 0.3036288171222010 | T | T | T |
| 0.2532300060000026 | 0.5731999870000024  | 0.0817899999999980 | F | F | F |
| 0.2521647271563943 | 0.7227605742919559  | 0.3156460706624046 | T | T | T |
| 0.2532300060000026 | 0.8573899869999977  | 0.1309400049999994 | F | F | F |
| 0.2576372961219321 | -0.0031269490401204 | 0.3363801341205469 | T | T | T |
| 0.0865600030000024 | 0.3573899869999977  | 0.1309400049999994 | F | F | F |
| 0.0898463453142451 | 0.4978059430299115  | 0.3351181443258098 | T | T | T |
| 0.4198899869999977 | 0.7164899710000014  | 0.0491500010000010 | F | F | F |
| 0.4168407299031583 | 0.8468455160903624  | 0.2426983676226461 | T | T | T |
| 0.5865600110000031 | 0.2164900000000003  | 0.0491500010000010 | F | F | F |
| 0.5867530253033051 | 0.3453989253034561  | 0.2518133937648351 | T | T | T |
| 0.5884881506446292 | 0.0729974327436018  | 0.2005512430702885 | T | T | T |
| 0.5865600110000031 | 0.9322999720000027  | 0.0000000000000000 | F | F | F |
| 0.4198899869999977 | 0.4323000010000015  | 0.0000000000000000 | F | F | F |
| 0.4084905265131670 | 0.5636772961098090  | 0.2006353675488480 | T | T | T |
| 0.4198899869999977 | 0.0732000020000001  | 0.0817899999999980 | F | F | F |
| 0.4199365146904364 | 0.2070056058166884  | 0.3017260153860502 | T | T | T |
| 0.5865600110000031 | 0.5731999870000024  | 0.0817899999999980 | F | F | F |
| 0.5881617778267133 | 0.7034041983240802  | 0.2770788376919794 | T | T | T |
| 0.5865600110000031 | 0.8573899869999977  | 0.1309400049999994 | F | F | F |
| 0.5821394814666003 | -0.0112262870962828 | 0.3374588632118536 | T | T | T |
| 0.4198899869999977 | 0.3573899869999977  | 0.1309400049999994 | F | F | F |
| 0.4140973275586091 | 0.4847679050175928  | 0.3352618376538100 | T | T | T |
| 0.7532299760000001 | 0.7164899710000014  | 0.0491500010000010 | F | F | F |
| 0.7579836770527241 | 0.8521810352026963  | 0.2498231968206016 | T | T | T |

|                    |                     |                    |   |   |   |
|--------------------|---------------------|--------------------|---|---|---|
| 0.9198899869999977 | 0.2164900000000003  | 0.0491500010000010 | F | F | F |
| 0.9188936991242250 | 0.3503889454408434  | 0.2525938787336076 | T | T | T |
| 0.9203700985632780 | 0.0719975965133458  | 0.2010201521845394 | T | T | T |
| 0.9198899869999977 | 0.9322999720000027  | 0.0000000000000000 | F | F | F |
| 0.7532299760000001 | 0.4323000010000015  | 0.0000000000000000 | F | F | F |
| 0.7625396935011154 | 0.5643562695402270  | 0.2031777590020158 | T | T | T |
| 0.7532299760000001 | 0.0732000020000001  | 0.0817899999999980 | F | F | F |
| 0.7526449298718916 | 0.2094681808287345  | 0.3049152587902064 | T | T | T |
| 0.9198899869999977 | 0.5731999870000024  | 0.0817899999999980 | F | F | F |
| 0.9257332738588434 | 0.7135783984723404  | 0.3037370734867891 | T | T | T |
| 0.9198899869999977 | 0.8573899869999977  | 0.1309400049999994 | F | F | F |
| 0.9258886863868400 | -0.0013612612347245 | 0.3344864010843122 | T | T | T |
| 0.7532299760000001 | 0.3573899869999977  | 0.1309400049999994 | F | F | F |
| 0.7451610432983781 | 0.5023139316020147  | 0.3419516723206332 | T | T | T |
| 0.5299731290511162 | 0.7455819599828820  | 0.4911641305604792 | T | T | T |
| 0.5741968701314182 | 0.8057393627849050  | 0.3714453330887580 | T | T | T |
| 0.4626498614398203 | 0.5827231456870506  | 0.4158706759064649 | T | T | T |
| 0.6637099481148205 | 0.6044581420119743  | 0.4134609599223650 | T | T | T |
| 0.3598900333619294 | 0.7786735575308814  | 0.4027950819981010 | T | T | T |

**Ni<sub>6,a</sub>:**

1.0000000000000000

11.3280000686999998      0.0000000000000000      0.0000000000000000

0.0000000000000000      10.2098999023000001      0.0000000000000000

0.0000000000000000 0.0000000000000000 17.8448009491000015

Ti O Ni

24 48 6

Direct

|                    |                    |                    |   |   |   |
|--------------------|--------------------|--------------------|---|---|---|
| 0.0865600030000024 | 0.2966000139999991 | 0.0900399980000017 | F | F | F |
| 0.0867642551901621 | 0.4197282251765940 | 0.2885333529670294 | T | T | T |
| 0.2532300060000026 | 0.7965999839999967 | 0.0900399980000017 | F | F | F |
| 0.2553098865283464 | 0.9178144429165572 | 0.2916776987012365 | T | T | T |
| 0.2532300060000026 | 0.5124099849999979 | 0.0408900010000011 | F | F | F |
| 0.2526581867104474 | 0.6495618642834088 | 0.2442322433202728 | T | T | T |
| 0.0865600030000024 | 0.0124100000000027 | 0.0408900010000011 | F | F | F |
| 0.0877485745187446 | 0.1469259144695545 | 0.2505566316147552 | T | T | T |
| 0.4198899869999977 | 0.2966000139999991 | 0.0900399980000017 | F | F | F |
| 0.4231385961588595 | 0.4297521528457748 | 0.2868999299536672 | T | T | T |
| 0.5865600110000031 | 0.7965999839999967 | 0.0900399980000017 | F | F | F |
| 0.5860884500999036 | 0.9200320336477038 | 0.2886467722881161 | T | T | T |
| 0.5865600110000031 | 0.5124099849999979 | 0.0408900010000011 | F | F | F |
| 0.5867463127222285 | 0.6477346373809074 | 0.2421861159138827 | T | T | T |
| 0.4198899869999977 | 0.0124100000000027 | 0.0408900010000011 | F | F | F |
| 0.4192966525914578 | 0.1530292563922224 | 0.2507131826497762 | T | T | T |
| 0.7532299760000001 | 0.2966000139999991 | 0.0900399980000017 | F | F | F |
| 0.7564113586602206 | 0.4271796642940883 | 0.2881559512903523 | T | T | T |
| 0.9198899869999977 | 0.7965999839999967 | 0.0900399980000017 | F | F | F |
| 0.9195381214426955 | 0.9209050567466426 | 0.2896784329928670 | T | T | T |
| 0.9198899869999977 | 0.5124099849999979 | 0.0408900010000011 | F | F | F |

|                    |                    |                    |   |   |   |
|--------------------|--------------------|--------------------|---|---|---|
| 0.9224841632423665 | 0.6515331377249388 | 0.2491977081783193 | T | T | T |
| 0.7532299760000001 | 0.0124100000000027 | 0.0408900010000011 | F | F | F |
| 0.7524967727834454 | 0.1503744454216365 | 0.2488889300166050 | T | T | T |
| 0.0865600030000024 | 0.4761500059999975 | 0.0491500010000010 | F | F | F |
| 0.0877673626073714 | 0.6108118946467040 | 0.2475791624915590 | T | T | T |
| 0.2533174582587672 | 0.1036331931373736 | 0.2519884379821316 | T | T | T |
| 0.2532300060000026 | 0.9761499760000021 | 0.0491500010000010 | F | F | F |
| 0.2532300060000026 | 0.6919599770000033 | 0.0000000000000000 | F | F | F |
| 0.2498866804228632 | 0.8310096601767057 | 0.2022697129663238 | T | T | T |
| 0.0865600030000024 | 0.1919600069999987 | 0.0000000000000000 | F | F | F |
| 0.0887750145442181 | 0.3292111143170047 | 0.2011204659103787 | T | T | T |
| 0.0865600030000024 | 0.8328599929999996 | 0.0817899999999980 | F | F | F |
| 0.0875207873352526 | 0.9693033229786475 | 0.3044611745168533 | T | T | T |
| 0.2532300060000026 | 0.3328599929999996 | 0.0817899999999980 | F | F | F |
| 0.2509519845578815 | 0.4780756402832445 | 0.3052274473356524 | T | T | T |
| 0.2532300060000026 | 0.6170499919999983 | 0.1309400049999994 | F | F | F |
| 0.2669675706679200 | 0.7524286238664146 | 0.3389705922660294 | T | T | T |
| 0.0865600030000024 | 0.1170499999999990 | 0.1309400049999994 | F | F | F |
| 0.0884771891351838 | 0.2582854312691080 | 0.3348372502710990 | T | T | T |
| 0.4198899869999977 | 0.4761500059999975 | 0.0491500010000010 | F | F | F |
| 0.4184791599935080 | 0.6101684469074115 | 0.2392547161266964 | T | T | T |
| 0.5860595979227193 | 0.1067072398061856 | 0.2497763843055859 | T | T | T |
| 0.5865600110000031 | 0.9761499760000021 | 0.0491500010000010 | F | F | F |
| 0.5865600110000031 | 0.6919599770000033 | 0.0000000000000000 | F | F | F |
| 0.5892474415211173 | 0.8320050074731647 | 0.1999323284836320 | T | T | T |

|                    |                    |                    |   |   |   |
|--------------------|--------------------|--------------------|---|---|---|
| 0.4198899869999977 | 0.1919600069999987 | 0.0000000000000000 | F | F | F |
| 0.4051846783831925 | 0.3225579179729766 | 0.2007901341662930 | T | T | T |
| 0.4198899869999977 | 0.8328599929999996 | 0.0817899999999980 | F | F | F |
| 0.4202008357485671 | 0.9702936603963710 | 0.3039807131633567 | T | T | T |
| 0.5865600110000031 | 0.3328599929999996 | 0.0817899999999980 | F | F | F |
| 0.5894997758591893 | 0.4587069853943210 | 0.2696795044794587 | T | T | T |
| 0.5865600110000031 | 0.6170499919999983 | 0.1309400049999994 | F | F | F |
| 0.5791141737692855 | 0.7552653095505140 | 0.3363226054396711 | T | T | T |
| 0.4198899869999977 | 0.1170499999999990 | 0.1309400049999994 | F | F | F |
| 0.4233183917860830 | 0.2584939842496268 | 0.3386052768836686 | T | T | T |
| 0.7532299760000001 | 0.4761500059999975 | 0.0491500010000010 | F | F | F |
| 0.7562677597136581 | 0.6130787704349747 | 0.2500023638751879 | T | T | T |
| 0.9208263731735850 | 0.1081951562083794 | 0.2521389897795616 | T | T | T |
| 0.9198899869999977 | 0.9761499760000021 | 0.0491500010000010 | F | F | F |
| 0.9198899869999977 | 0.6919599770000033 | 0.0000000000000000 | F | F | F |
| 0.9215943608039301 | 0.8315692511122649 | 0.2014297662473264 | T | T | T |
| 0.7532299760000001 | 0.1919600069999987 | 0.0000000000000000 | F | F | F |
| 0.7688638668438594 | 0.3242257704492270 | 0.2016868901183943 | T | T | T |
| 0.7532299760000001 | 0.8328599929999996 | 0.0817899999999980 | F | F | F |
| 0.7530505408109991 | 0.9700552935288614 | 0.3031826337879442 | T | T | T |
| 0.9198899869999977 | 0.3328599929999996 | 0.0817899999999980 | F | F | F |
| 0.9234791504668447 | 0.4747075890892101 | 0.3030855479365424 | T | T | T |
| 0.9198899869999977 | 0.6170499919999983 | 0.1309400049999994 | F | F | F |
| 0.9195828835972246 | 0.7579517682568818 | 0.3359019245807760 | T | T | T |
| 0.7532299760000001 | 0.1170499999999990 | 0.1309400049999994 | F | F | F |

|                    |                    |                    |   |   |   |
|--------------------|--------------------|--------------------|---|---|---|
| 0.7428724844764589 | 0.2559166377831038 | 0.3377218761307534 | T | T | T |
| 0.5813374433786924 | 0.4911887643253173 | 0.5011085370482729 | T | T | T |
| 0.4604353480703281 | 0.3865027980791642 | 0.4138031879332520 | T | T | T |
| 0.5508485001725920 | 0.6043341511919654 | 0.3905161660567636 | T | T | T |
| 0.3437270930128812 | 0.5943144161869572 | 0.3849657607751423 | T | T | T |
| 0.6753090672857938 | 0.3589865464189138 | 0.4126855893016615 | T | T | T |
| 0.7422554250185277 | 0.5661137494348242 | 0.4366004421722002 | T | T | T |

**Ni<sub>4,A</sub>:**

1.00000000000000

|                     |                     |                     |
|---------------------|---------------------|---------------------|
| 11.3280000686999998 | 0.0000000000000000  | 0.0000000000000000  |
| 0.0000000000000000  | 10.2098999023000001 | 0.0000000000000000  |
| 0.0000000000000000  | 0.0000000000000000  | 17.8448009491000015 |

Ti O Ni

24 47 4

Direct

|                    |                    |                    |   |   |   |
|--------------------|--------------------|--------------------|---|---|---|
| 0.0865600030000024 | 0.5369399790000031 | 0.0900399980000017 | F | F | F |
| 0.0840424638793958 | 0.6599878580347170 | 0.2881432439684494 | T | T | T |
| 0.2532300060000026 | 0.0369400009999978 | 0.0900399980000017 | F | F | F |
| 0.2528468300822124 | 0.1577538687766846 | 0.2916823082419316 | T | T | T |
| 0.2532300060000026 | 0.7527499790000007 | 0.0408900010000011 | F | F | F |
| 0.2517851815124045 | 0.8889075481179289 | 0.2471868414086718 | T | T | T |
| 0.0865600030000024 | 0.2527500090000032 | 0.0408900010000011 | F | F | F |
| 0.0881085114804991 | 0.3829543041897981 | 0.2445298946186462 | T | T | T |



|                    |                    |                    |   |   |   |
|--------------------|--------------------|--------------------|---|---|---|
| 0.4198899869999977 | 0.5369399790000031 | 0.0900399980000017 | F | F | F |
| 0.4201366778101610 | 0.6672541250108933 | 0.2962769439040409 | T | T | T |
| 0.5865600110000031 | 0.0369400009999978 | 0.0900399980000017 | F | F | F |
| 0.5868676707254418 | 0.1578212221203359 | 0.2916213611641560 | T | T | T |
| 0.5865600110000031 | 0.7527499790000007 | 0.0408900010000011 | F | F | F |
| 0.5880923061932382 | 0.8889536550231977 | 0.2471516420060816 | T | T | T |
| 0.4198899869999977 | 0.2527500090000032 | 0.0408900010000011 | F | F | F |
| 0.4198355036536746 | 0.3863245529832294 | 0.2388222673470952 | T | T | T |
| 0.7532299760000001 | 0.5369399790000031 | 0.0900399980000017 | F | F | F |
| 0.7559701808238334 | 0.6600205577169491 | 0.2880622676925995 | T | T | T |
| 0.9198899869999977 | 0.0369400009999978 | 0.0900399980000017 | F | F | F |
| 0.9198238884146804 | 0.1594801690407492 | 0.2897057421593491 | T | T | T |
| 0.9198899869999977 | 0.7527499790000007 | 0.0408900010000011 | F | F | F |
| 0.9198977779534868 | 0.8899705786043524 | 0.2479984198038994 | T | T | T |
| 0.7532299760000001 | 0.2527500090000032 | 0.0408900010000011 | F | F | F |
| 0.7516910354484836 | 0.3829309255190612 | 0.2444696221714880 | T | T | T |
| 0.0865600030000024 | 0.7164899710000014 | 0.0491500010000010 | F | F | F |
| 0.0849387588403854 | 0.8469605678067972 | 0.2470769314165092 | T | T | T |
| 0.2532300060000026 | 0.2164900000000003 | 0.0491500010000010 | F | F | F |
| 0.2546318530297451 | 0.3384167283059983 | 0.2415891169575373 | T | T | T |
| 0.2595988044063157 | 0.0697809124392769 | 0.2020490843855753 | T | T | T |
| 0.2532300060000026 | 0.9322999720000027 | 0.0000000000000000 | F | F | F |
| 0.0865600030000024 | 0.4323000010000015 | 0.0000000000000000 | F | F | F |
| 0.0840451431574585 | 0.5688297688678788 | 0.2009549473260432 | T | T | T |
| 0.0865600030000024 | 0.0732000020000001 | 0.0817899999999980 | F | F | F |

|                    |                     |                    |   |   |   |
|--------------------|---------------------|--------------------|---|---|---|
| 0.0875185602231232 | 0.2107843892460637  | 0.3016858530384925 | T | T | T |
| 0.2532300060000026 | 0.5731999870000024  | 0.0817899999999980 | F | F | F |
| 0.2485922908630805 | 0.7146596048980720  | 0.3041479042630164 | T | T | T |
| 0.2532300060000026 | 0.8573899869999977  | 0.1309400049999994 | F | F | F |
| 0.2498335410281812 | -0.0052458307830422 | 0.3346697060883003 | T | T | T |
| 0.0865600030000024 | 0.3573899869999977  | 0.1309400049999994 | F | F | F |
| 0.0988924859163067 | 0.4926257078360177  | 0.3354692815353311 | T | T | T |
| 0.4198899869999977 | 0.7164899710000014  | 0.0491500010000010 | F | F | F |
| 0.4199510470771025 | 0.8445151105612808  | 0.2518477376703773 | T | T | T |
| 0.5865600110000031 | 0.2164900000000003  | 0.0491500010000010 | F | F | F |
| 0.5851502688531751 | 0.3384977172340941  | 0.2416027305484006 | T | T | T |
| 0.5801833321915136 | 0.0698207593939101  | 0.2019892229419628 | T | T | T |
| 0.5865600110000031 | 0.9322999720000027  | 0.0000000000000000 | F | F | F |
| 0.4198899869999977 | 0.4323000010000015  | 0.0000000000000000 | F | F | F |
| 0.4199831387249020 | 0.5656711902752973  | 0.2077379985046308 | T | T | T |
| 0.4198899869999977 | 0.0732000020000001  | 0.0817899999999980 | F | F | F |
| 0.4198739640091937 | 0.2173753481487870  | 0.3165760497806511 | T | T | T |
| 0.5865600110000031 | 0.5731999870000024  | 0.0817899999999980 | F | F | F |
| 0.5914560717480337 | 0.7148675883307813  | 0.3040644054710193 | T | T | T |
| 0.5865600110000031 | 0.8573899869999977  | 0.1309400049999994 | F | F | F |
| 0.5900301466691305 | -0.0051380003238738 | 0.3346479930450753 | T | T | T |
| 0.4198899869999977 | 0.3573899869999977  | 0.1309400049999994 | F | F | F |
| 0.7532299760000001 | 0.7164899710000014  | 0.0491500010000010 | F | F | F |
| 0.7549392538645606 | 0.8469159987484004  | 0.2469505401628745 | T | T | T |
| 0.9198899869999977 | 0.2164900000000003  | 0.0491500010000010 | F | F | F |

|                    |                     |                    |   |   |   |
|--------------------|---------------------|--------------------|---|---|---|
| 0.9198802574043432 | 0.3502198235206204  | 0.2507254429058489 | T | T | T |
| 0.9199569021801184 | 0.0712528732613068  | 0.2012359142379980 | T | T | T |
| 0.9198899869999977 | 0.9322999720000027  | 0.0000000000000000 | F | F | F |
| 0.7532299760000001 | 0.4323000010000015  | 0.0000000000000000 | F | F | F |
| 0.7559184505769795 | 0.5688770441022482  | 0.2008886406284120 | T | T | T |
| 0.7532299760000001 | 0.0732000020000001  | 0.0817899999999980 | F | F | F |
| 0.7522223438893521 | 0.2108703011487168  | 0.3016983323947385 | T | T | T |
| 0.9198899869999977 | 0.5731999870000024  | 0.0817899999999980 | F | F | F |
| 0.9199104148172160 | 0.7097698620945696  | 0.3045372653937746 | T | T | T |
| 0.9198899869999977 | 0.8573899869999977  | 0.1309400049999994 | F | F | F |
| 0.9198002669911983 | -0.0021058822784200 | 0.3344888072473204 | T | T | T |
| 0.7532299760000001 | 0.3573899869999977  | 0.1309400049999994 | F | F | F |
| 0.7408931275872624 | 0.4926383593369574  | 0.3353811921719250 | T | T | T |
| 0.5774048664029038 | 0.5278000999684054  | 0.3580253924720626 | T | T | T |
| 0.4197733326369335 | 0.3804518583907133  | 0.3724743179082041 | T | T | T |
| 0.4197731324584371 | 0.5851894880425634  | 0.4293941383462563 | T | T | T |
| 0.2623795071233699 | 0.5281647990941715  | 0.3578578762307258 | T | T | T |

### Ni<sub>5,A</sub>:

1.0000000000000000

|                     |                     |                     |
|---------------------|---------------------|---------------------|
| 11.3280000686999998 | 0.0000000000000000  | 0.0000000000000000  |
| 0.0000000000000000  | 10.2098999023000001 | 0.0000000000000000  |
| 0.0000000000000000  | 0.0000000000000000  | 17.8448009491000015 |

Ti O Ni

## Direct

|                    |                    |                    |   |   |   |
|--------------------|--------------------|--------------------|---|---|---|
| 0.0865600030000024 | 0.5369399790000031 | 0.0900399980000017 | F | F | F |
| 0.0854817062912051 | 0.6632081423136644 | 0.2882750322858721 | T | T | T |
| 0.2532300060000026 | 0.0369400009999978 | 0.0900399980000017 | F | F | F |
| 0.2476103729492893 | 0.1546648005159986 | 0.2956329459434357 | T | T | T |
| 0.2532300060000026 | 0.7527499790000007 | 0.0408900010000011 | F | F | F |
| 0.2522858130854757 | 0.8894395799284337 | 0.2462062458320151 | T | T | T |
| 0.0865600030000024 | 0.2527500090000032 | 0.0408900010000011 | F | F | F |
| 0.0813864957259036 | 0.3883733122693768 | 0.2446552786158652 | T | T | T |
| 0.4198899869999977 | 0.5369399790000031 | 0.0900399980000017 | F | F | F |
| 0.4193665425299600 | 0.6649577601494792 | 0.2927151875581175 | T | T | T |
| 0.5865600110000031 | 0.0369400009999978 | 0.0900399980000017 | F | F | F |
| 0.5919089347581800 | 0.1533676681942579 | 0.2918522231032172 | T | T | T |
| 0.5865600110000031 | 0.7527499790000007 | 0.0408900010000011 | F | F | F |
| 0.5871039848626767 | 0.8868941840784328 | 0.2457334217469972 | T | T | T |
| 0.4198899869999977 | 0.2527500090000032 | 0.0408900010000011 | F | F | F |
| 0.4181856951439272 | 0.3809562997561331 | 0.2387148186774249 | T | T | T |
| 0.7532299760000001 | 0.5369399790000031 | 0.0900399980000017 | F | F | F |
| 0.7555173448289659 | 0.6626790143656971 | 0.2877070972663337 | T | T | T |
| 0.9198899869999977 | 0.0369400009999978 | 0.0900399980000017 | F | F | F |
| 0.9189214669891185 | 0.1579750564494479 | 0.2902980845415342 | T | T | T |
| 0.9198899869999977 | 0.7527499790000007 | 0.0408900010000011 | F | F | F |
| 0.9197154747401345 | 0.8895961292662664 | 0.2472287574542348 | T | T | T |
| 0.7532299760000001 | 0.2527500090000032 | 0.0408900010000011 | F | F | F |

|                    |                     |                    |   |   |   |
|--------------------|---------------------|--------------------|---|---|---|
| 0.7537989524412912 | 0.3872934713272426  | 0.2446403180639980 | T | T | T |
| 0.0865600030000024 | 0.7164899710000014  | 0.0491500010000010 | F | F | F |
| 0.0852227443171313 | 0.8477032865399782  | 0.2465585742735585 | T | T | T |
| 0.2532300060000026 | 0.2164900000000003  | 0.0491500010000010 | F | F | F |
| 0.2508554148496074 | 0.3513823057084426  | 0.2487371924858871 | T | T | T |
| 0.2534664182767342 | 0.0721155338057030  | 0.2027545578119142 | T | T | T |
| 0.2532300060000026 | 0.9322999720000027  | 0.0000000000000000 | F | F | F |
| 0.0865600030000024 | 0.4323000010000015  | 0.0000000000000000 | F | F | F |
| 0.0845149838674290 | 0.5706149206586977  | 0.2008431213595317 | T | T | T |
| 0.0865600030000024 | 0.0732000020000001  | 0.0817899999999980 | F | F | F |
| 0.0829290932364466 | 0.2132207965483300  | 0.3018485807461521 | T | T | T |
| 0.2532300060000026 | 0.5731999870000024  | 0.0817899999999980 | F | F | F |
| 0.2503735840004617 | 0.7147209293599476  | 0.3013144958242203 | T | T | T |
| 0.2532300060000026 | 0.8573899869999977  | 0.1309400049999994 | F | F | F |
| 0.2460700127604084 | -0.0071436093809853 | 0.3362978377412700 | T | T | T |
| 0.0865600030000024 | 0.3573899869999977  | 0.1309400049999994 | F | F | F |
| 0.0870983031257052 | 0.4995318434819732  | 0.3369618130675731 | T | T | T |
| 0.4198899869999977 | 0.7164899710000014  | 0.0491500010000010 | F | F | F |
| 0.4190915024388362 | 0.8493736386100805  | 0.2513056673580580 | T | T | T |
| 0.5865600110000031 | 0.2164900000000003  | 0.0491500010000010 | F | F | F |
| 0.5883111404355837 | 0.3460570795118034  | 0.2454661131862709 | T | T | T |
| 0.5882537745889250 | 0.0713885991581029  | 0.2007550320797310 | T | T | T |
| 0.5865600110000031 | 0.9322999720000027  | 0.0000000000000000 | F | F | F |
| 0.4198899869999977 | 0.4323000010000015  | 0.0000000000000000 | F | F | F |
| 0.4145283422403712 | 0.5633179686950377  | 0.2059276915830666 | T | T | T |

|                    |                     |                    |   |   |   |
|--------------------|---------------------|--------------------|---|---|---|
| 0.4198899869999977 | 0.0732000020000001  | 0.0817899999999980 | F | F | F |
| 0.4217016379980107 | 0.1989267209856221  | 0.3001531875548420 | T | T | T |
| 0.5865600110000031 | 0.5731999870000024  | 0.0817899999999980 | F | F | F |
| 0.5889780558803537 | 0.7150849122951913  | 0.2973036065591886 | T | T | T |
| 0.5865600110000031 | 0.8573899869999977  | 0.1309400049999994 | F | F | F |
| 0.5930199427288425 | -0.0077705465025719 | 0.3345043798035247 | T | T | T |
| 0.4198899869999977 | 0.3573899869999977  | 0.1309400049999994 | F | F | F |
| 0.7532299760000001 | 0.7164899710000014  | 0.0491500010000010 | F | F | F |
| 0.7551251522288670 | 0.8478627374688968  | 0.2463860425009410 | T | T | T |
| 0.9198899869999977 | 0.2164900000000003  | 0.0491500010000010 | F | F | F |
| 0.9183163022187194 | 0.3509063209037908  | 0.2489917122431199 | T | T | T |
| 0.9185268077173623 | 0.0715440108894033  | 0.2010078682726705 | T | T | T |
| 0.9198899869999977 | 0.9322999720000027  | 0.0000000000000000 | F | F | F |
| 0.7532299760000001 | 0.4323000010000015  | 0.0000000000000000 | F | F | F |
| 0.7603814192912057 | 0.5698194647746232  | 0.2006033505647701 | T | T | T |
| 0.7532299760000001 | 0.0732000020000001  | 0.0817899999999980 | F | F | F |
| 0.7550559223948199 | 0.2150733345778312  | 0.3040050909927824 | T | T | T |
| 0.9198899869999977 | 0.5731999870000024  | 0.0817899999999980 | F | F | F |
| 0.9199456490647203 | 0.7120646437972671  | 0.3037062092849095 | T | T | T |
| 0.9198899869999977 | 0.8573899869999977  | 0.1309400049999994 | F | F | F |
| 0.9196925921339750 | -0.0033410469983942 | 0.3343831142223984 | T | T | T |
| 0.7532299760000001 | 0.3573899869999977  | 0.1309400049999994 | F | F | F |
| 0.7365508355914522 | 0.5015847543940390  | 0.3364826719657248 | T | T | T |
| 0.4146929569838627 | 0.5424004767562388  | 0.4065679318299161 | T | T | T |
| 0.2481216415236086 | 0.4390982298078751  | 0.3472907705284706 | T | T | T |

|                    |                    |                    |   |   |   |
|--------------------|--------------------|--------------------|---|---|---|
| 0.4107038964778303 | 0.3153039610292151 | 0.3836666572247361 | T | T | T |
| 0.5658530477171946 | 0.4579725946054117 | 0.3352265062627792 | T | T | T |
| 0.2895832166030885 | 0.4037903280191178 | 0.4724949578311981 | T | T | T |

**Ni<sub>6,A</sub>:**

1.00000000000000

|                     |                     |                     |
|---------------------|---------------------|---------------------|
| 11.3280000686999998 | 0.0000000000000000  | 0.0000000000000000  |
| 0.0000000000000000  | 10.2098999023000001 | 0.0000000000000000  |
| 0.0000000000000000  | 0.0000000000000000  | 17.8448009491000015 |

Ti O Ni

24 47 6

Direct

|                    |                    |                    |   |   |   |
|--------------------|--------------------|--------------------|---|---|---|
| 0.0865600030000024 | 0.5369399790000031 | 0.0900399980000017 | F | F | F |
| 0.0839704449023716 | 0.6632087821105362 | 0.2894927393669878 | T | T | T |
| 0.2532300060000026 | 0.0369400009999978 | 0.0900399980000017 | F | F | F |
| 0.2470207283701021 | 0.1557636150736175 | 0.2938341215094158 | T | T | T |
| 0.2532300060000026 | 0.7527499790000007 | 0.0408900010000011 | F | F | F |
| 0.2499537524854619 | 0.8931889708721924 | 0.2446982332858673 | T | T | T |
| 0.0865600030000024 | 0.2527500090000032 | 0.0408900010000011 | F | F | F |
| 0.0840618913689148 | 0.3888220756054428 | 0.2441219658792397 | T | T | T |
| 0.4198899869999977 | 0.5369399790000031 | 0.0900399980000017 | F | F | F |
| 0.4208244249557814 | 0.6764293856646526 | 0.2894937491232624 | T | T | T |
| 0.5865600110000031 | 0.0369400009999978 | 0.0900399980000017 | F | F | F |
| 0.5936408371942896 | 0.1557576155323501 | 0.2938357530924528 | T | T | T |

|                    |                    |                    |   |   |   |
|--------------------|--------------------|--------------------|---|---|---|
| 0.5865600110000031 | 0.7527499790000007 | 0.0408900010000011 | F | F | F |
| 0.5917130504062384 | 0.8932854696212417 | 0.2444886272626528 | T | T | T |
| 0.4198899869999977 | 0.2527500090000032 | 0.0408900010000011 | F | F | F |
| 0.4204025815417745 | 0.3803659598654411 | 0.2388095469692227 | T | T | T |
| 0.7532299760000001 | 0.5369399790000031 | 0.0900399980000017 | F | F | F |
| 0.7578843271965728 | 0.6633713487091208 | 0.2894918327378171 | T | T | T |
| 0.9198899869999977 | 0.0369400009999978 | 0.0900399980000017 | F | F | F |
| 0.9202316950690419 | 0.1590625583100872 | 0.2905415736791132 | T | T | T |
| 0.9198899869999977 | 0.7527499790000007 | 0.0408900010000011 | F | F | F |
| 0.9208683588092615 | 0.8913310937657003 | 0.2459853534180345 | T | T | T |
| 0.7532299760000001 | 0.2527500090000032 | 0.0408900010000011 | F | F | F |
| 0.7565688752738449 | 0.3889575073217458 | 0.2441234880808905 | T | T | T |
| 0.0865600030000024 | 0.7164899710000014 | 0.0491500010000010 | F | F | F |
| 0.0852460030702377 | 0.8460470454948549 | 0.2443387018427558 | T | T | T |
| 0.2532300060000026 | 0.2164900000000003 | 0.0491500010000010 | F | F | F |
| 0.2519520934145086 | 0.3508477095957073 | 0.2501727928032536 | T | T | T |
| 0.2458002292415084 | 0.0709314453220302 | 0.2013138380412472 | T | T | T |
| 0.2532300060000026 | 0.9322999720000027 | 0.0000000000000000 | F | F | F |
| 0.0865600030000024 | 0.4323000010000015 | 0.0000000000000000 | F | F | F |
| 0.0837630215083686 | 0.5714959475185895 | 0.2014762711281425 | T | T | T |
| 0.0865600030000024 | 0.0732000020000001 | 0.0817899999999980 | F | F | F |
| 0.0827288542642873 | 0.2162773954640247 | 0.3031129305656832 | T | T | T |
| 0.2532300060000026 | 0.5731999870000024 | 0.0817899999999980 | F | F | F |
| 0.2477764482365331 | 0.7249512767671168 | 0.3087985233780741 | T | T | T |
| 0.2532300060000026 | 0.8573899869999977 | 0.1309400049999994 | F | F | F |



|                    |                     |                    |   |   |   |
|--------------------|---------------------|--------------------|---|---|---|
| 0.2461576064569914 | -0.0055123651190317 | 0.3356799834887201 | T | T | T |
| 0.0865600030000024 | 0.3573899869999977  | 0.1309400049999994 | F | F | F |
| 0.1011432171142233 | 0.4999922427470551  | 0.3371511452110076 | T | T | T |
| 0.4198899869999977 | 0.7164899710000014  | 0.0491500010000010 | F | F | F |
| 0.4206644255884253 | 0.8506968364375902  | 0.2477880438919474 | T | T | T |
| 0.5865600110000031 | 0.2164900000000003  | 0.0491500010000010 | F | F | F |
| 0.5887218505986206 | 0.3510530791554333  | 0.2499667700358562 | T | T | T |
| 0.5948109410607173 | 0.0711123808236346  | 0.2012662093858649 | T | T | T |
| 0.5865600110000031 | 0.9322999720000027  | 0.0000000000000000 | F | F | F |
| 0.4198899869999977 | 0.4323000010000015  | 0.0000000000000000 | F | F | F |
| 0.4204420365307354 | 0.5624091189542944  | 0.2065809024550415 | T | T | T |
| 0.4198899869999977 | 0.0732000020000001  | 0.0817899999999980 | F | F | F |
| 0.4202550819388058 | 0.1862156687039863  | 0.2874330433899304 | T | T | T |
| 0.5865600110000031 | 0.5731999870000024  | 0.0817899999999980 | F | F | F |
| 0.5938551834103613 | 0.7254243712935555  | 0.3086079998735193 | T | T | T |
| 0.5865600110000031 | 0.8573899869999977  | 0.1309400049999994 | F | F | F |
| 0.5955129550613401 | -0.0054657422395409 | 0.3355651173857778 | T | T | T |
| 0.4198899869999977 | 0.3573899869999977  | 0.1309400049999994 | F | F | F |
| 0.7532299760000001 | 0.7164899710000014  | 0.0491500010000010 | F | F | F |
| 0.7563452130681196 | 0.8462833326233020  | 0.2441244908239198 | T | T | T |
| 0.9198899869999977 | 0.2164900000000003  | 0.0491500010000010 | F | F | F |
| 0.9202993419475251 | 0.3553118938587643  | 0.2495438031150705 | T | T | T |
| 0.9204060468105241 | 0.0723705094259431  | 0.2009877547014398 | T | T | T |
| 0.9198899869999977 | 0.9322999720000027  | 0.0000000000000000 | F | F | F |
| 0.7532299760000001 | 0.4323000010000015  | 0.0000000000000000 | F | F | F |

|                    |                     |                    |   |   |   |
|--------------------|---------------------|--------------------|---|---|---|
| 0.7568747814240265 | 0.5715978914911937  | 0.2014429843342058 | T | T | T |
| 0.7532299760000001 | 0.0732000020000001  | 0.0817899999999980 | F | F | F |
| 0.7578178343494323 | 0.2164336958348777  | 0.3030316240141754 | T | T | T |
| 0.9198899869999977 | 0.5731999870000024  | 0.0817899999999980 | F | F | F |
| 0.9207983280813126 | 0.7123047422089008  | 0.3057929005629886 | T | T | T |
| 0.9198899869999977 | 0.8573899869999977  | 0.1309400049999994 | F | F | F |
| 0.9205220342965341 | -0.0029278543257352 | 0.3338720913565205 | T | T | T |
| 0.7532299760000001 | 0.3573899869999977  | 0.1309400049999994 | F | F | F |
| 0.7406607096772960 | 0.5000775168650929  | 0.3371444007795897 | T | T | T |
| 0.2673249355654141 | 0.4431951813356815  | 0.3475248836493968 | T | T | T |
| 0.5257253798888594 | 0.6470097382572630  | 0.3995754317646570 | T | T | T |
| 0.4221354685779956 | 0.4713394465385768  | 0.4496742668268751 | T | T | T |
| 0.3171865529489853 | 0.6464450462027700  | 0.3998940668243040 | T | T | T |
| 0.5746841183980040 | 0.4430872751618116  | 0.3474463505179048 | T | T | T |
| 0.4210684362426818 | 0.2950842746388944  | 0.3720308713300904 | T | T | T |
